# Supplementary material for: Identifying leptospirosis hotspots in Selangor: uncovering climatic connections using remote sensing and developing a predictive model
Source: PeerJ. 2025 Mar 5;13:e18851. doi: 10.7717/peerj.18851 (PMC11890033; doi:10.7717/peerj.18851)
Supplement: Supplemental Information 8 [file peerj-13-18851-s008.xls]

## Sheet: 18-04-23 Final_Compile Case Lep
GlobalMain ID	Unique_CaseID	Epid Year (Notification Date)	Age (Years)	Current Address/Incident		Latitude	Longitude	Coordinates	Petient Status	Race	Citizenship	Gender	Country	Event Classification	Status Diagnosis	Method of Case Detection	Initial lab test	Event Month
7	2011_7	2011	20	NO 5,JLN 35A ,SELAYANG BARU,BATU CAVES,SELANGOR		3.25048	101.662	3.2504787, 101.6623826	Alive	Malay	Citizen	Male	MALAYSIA	Single/Sporadic	Lab confirmed Positive	Active	SEROLOGY	1
125	2011_125	2011	8	LOT 589,JLN MELATI,KG.TUMBUH DARAT,TANJUNG SEPAT,BANTING		2.66531	101.558	2.665308, 101.5576981	Alive	Malay	Citizen	Male	MALAYSIA	Single/Sporadic	Lab confirmed Positive	Passive	SEROLOGY	1
152	2011_152	2011	70	NO 14, JLN BK1/5, BANDAR KINRARA, PUCHONG		3.05422	101.65	3.0542184, 101.649809	Alive	Indian	Citizen	Female	MALAYSIA	Single/Sporadic	Lab confirmed Positive	Passive	SEROLOGY	1
156	2011_156	2011	73	NO 48 JALAN MUHIBBAH 10 TAMAN MUHIBBAH SERI KEMBANGAN		3.02575	101.714	3.0257457, 101.7136373	Alive	Chinese	Citizen	Male	MALAYSIA	Single/Sporadic	Lab confirmed Positive	Passive	SEROLOGY	1
248	2011_248	2011	81	NO 59, JALAN 2 AMPANG JAYA AMPANG		3.16149	101.763	3.1614891, 101.7625982	Deceased	Malay	Citizen	Female	MALAYSIA	Single/Sporadic	Lab confirmed Positive	Passive	SEROLOGY	1
175	2011_175	2011	49	76, JLN SS4B/18, KELANA JAYA		3.10802	101.601	3.1080236, 101.6006881	Alive	Malay	Citizen	Male	MALAYSIA	Single/Sporadic	Lab confirmed Positive	Passive	SEROLOGY	1
205	2011_205	2011	19	JALAN TEBUK RUKUN, SABAK BERNAM		3.82469	100.837	3.8246895, 100.8371949	Alive	Malay	Citizen	Female	MALAYSIA	Single/Sporadic	Lab confirmed Positive	Passive	PCR	1
154	2011_154	2011	24	NO.30 JLN SR 2/2 TMN SERDANG RAYA		3.03213	101.704	3.0321285, 101.7044499	Alive	Malay	Citizen	Male	MALAYSIA	Single/Sporadic	Lab confirmed Positive	Passive	SEROLOGY	1
198	2011_198	2011	12	JALAN TORKINTON SABAK BERNAM		3.75541	100.989	3.7554091, 100.9885934	Alive	Indian	Citizen	Female	MALAYSIA	Single/Sporadic	Lab confirmed Positive	Passive	PCR	1
29	2011_29	2011	12	HK017 KAMPUNG KEMENSAH HULU KELANG		3.21183	101.768	3.211825, 101.767685	Alive	Malay	Citizen	Male	MALAYSIA	Single/Sporadic	Lab confirmed Positive	Passive	SEROLOGY	1
90	2011_90	2011	20	41-01-2 FLAT BUKIT TINGGI JLN BATU NILAM 1C KLANG		3.00627	101.44	3.0062689, 101.4399076	Alive	Foreigners	Non-citizen	Male	MYANMAR	Single/Sporadic	Lab confirmed Positive	Passive	SEROLOGY	1
14	2011_14	2011	15	NO.35, JLN 11, TMN MATANG JAYA 35, Jalan Matang Jaya 11, Taman Matang Jaya, 47000 Sungai Buloh, Selangor		3.24385	101.568	3.24385, 101.5682771	Alive	Indian	Citizen	Male	MALAYSIA	Single/Sporadic	Lab confirmed Positive	Passive	SEROLOGY	1
150	2011_150	2011	29	RUMAH KONGSI PUCHONG PUTRA HEIGHT		3.00581	101.578	3.005805, 101.5777559	Alive	Foreigners	Non-citizen	Male	INDONESIA	Single/Sporadic	Lab confirmed Positive	Passive	SEROLOGY	1
28	2011_28	2011	20	17/3B JALAN UP 1/2 TAMAN UKAY PERDANA ULU KELANG KUALA LUMPUR		3.20793	101.78	3.2079347, 101.7802778	Alive	Malay	Citizen	Male	MALAYSIA	Single/Sporadic	Lab confirmed Positive	Passive	SEROLOGY	1
128	2011_128	2011	26	KG.ORANG ASLI SG.JUDAH,PULAU CAREY		2.83289	101.36	2.8328859, 101.3602481	Alive	Malay	Citizen	Female	MALAYSIA	Single/Sporadic	Lab confirmed Positive	Passive	SEROLOGY	1
1	2011_1	2011	25	NO.12 JALAN AU 4/17D, TAMAN SRI KERAMAT TENGAH, KUALA LUMPUR		3.19794	101.759	3.1979352, 101.7594852	Alive	Malay	Citizen	Male	MALAYSIA	Single/Sporadic	Lab confirmed Positive	Passive	SEROLOGY	1
215	2011_215	2011	20	NO 17 JALAN BUKIT MEWAH 15 TAMAN BUKIT MEWAH KAJANG		2.98844	101.799	2.9884371, 101.7985734	Alive	Malay	Citizen	Male	MALAYSIA	Single/Sporadic	Lab confirmed Positive	Passive	SEROLOGY	1
159	2011_159	2011	26	33 JLN SS 18/59 SUBANG JAYA		3.0729	101.585	3.072899, 101.584985	Alive	Malay	Citizen	Female	MALAYSIA	Single/Sporadic	Lab confirmed Positive	Passive	SEROLOGY	1
216	2011_216	2011	58	NO24,JLN WATAN 12,TAMAN SERI WATAN,AMPANG, SELANGOR		3.13782	101.772	3.137819, 101.7716595	Alive	Others	Citizen	Male	MALAYSIA	Single/Sporadic	Lab confirmed Positive	Passive	SEROLOGY	1
77	2011_77	2011	18	LOT 1139,LORONG HAJI OSMAN,RANTAU PANJANG,KLANG		3.06315	101.402	3.0631502, 101.401917	Alive	Malay	Citizen	Male	MALAYSIA	Single/Sporadic	Lab confirmed Positive	Passive	SEROLOGY	1
169	2011_169	2011	28	D-9-8, PELANGI DAMANSARA, PJ		3.15387	101.604	3.153867, 101.6036489	Alive	Foreigners	Non-citizen	Male	MYANMAR	Single/Sporadic	Lab confirmed Positive	Passive	SEROLOGY	1
6	2011_6	2011	35	NO 5 JLN 11C MATANG JAYA, SG BULOH		3.24928	101.668	3.2492783, 101.6684026	Alive	Malay	Citizen	Male	MALAYSIA	Single/Sporadic	Lab confirmed Positive	Passive	SEROLOGY	2
217	2011_217	2011	29	NO 17,JLN 23,TMN CHERAS BARU		3.10756	101.746	3.107556, 101.7463397	Alive	Foreigners	Non-citizen	Male	INDONESIA	Single/Sporadic	Lab confirmed Positive	Passive	SEROLOGY	2
140	2011_140	2011	22	LOT 3358,JALAN RIZAB MASJID, DEPAN KLINIK, KG BKT CHERAKAH, JERAM		3.27253	101.365	3.2725282, 101.3650768	Alive	Malay	Citizen	Female	MALAYSIA	Single/Sporadic	Lab confirmed Positive	Passive	SEROLOGY	2
180	2011_180	2011	34	NO 12 PARIT 3 BARAT 45300 SUNGAI BESAR SELANGOR		3.69803	100.992	3.6980289, 100.9919763	Deceased	Malay	Citizen	Male	MALAYSIA	Single/Sporadic	Lab confirmed Positive	Passive	PCR	2
288	2011_288	2011	10	NO 127 FELDA SG TENGI SELATAN_x000D_ KUALA KUBU BHARU		3.56529	101.435	3.565293, 101.4347761	Alive	Malay	Citizen	Female	MALAYSIA	Single/Sporadic	Lab confirmed Positive	Passive	SEROLOGY	2
91	2011_91	2011	22	NO.8,LORONG PAK MAT,LOT 557,TELOK GADONG KECIL,KLANG		3.03193	101.416	3.0319255, 101.4160249	Alive	Malay	Citizen	Male	MALAYSIA	Single/Sporadic	Lab confirmed Positive	Passive	SEROLOGY	2
136	2011_136	2011	25	NO 4, Jalan Reko Mutiara 1/3, Taman Reko Mutiara, Jalan Reko, 43000 Kajang, Selangor		2.95278	101.79	2.9527786, 101.7897392	Alive	Indian	Citizen	Female	MALAYSIA	Single/Sporadic	Lab confirmed Positive	Passive	SEROLOGY	2
24	2011_24	2011	14	LOT 2539 LORONG KENANGA,BATU 17, KUANG, Kampung Cempedak, 47000 Sungai Buloh, Selangor		3.23024	101.536	3.2302397, 101.5358991	Alive	Malay	Citizen	Male	MALAYSIA	Single/Sporadic	Lab confirmed Positive	Passive	SEROLOGY	2
168	2011_168	2011	22	Air Terjun Sungai Gabai, 41300 Hulu Langat, Selangor		3.16609	101.909	3.1660921, 101.9090289	Alive	Malay	Citizen	Male	MALAYSIA	Single/Sporadic	Lab confirmed Positive	Passive	SEROLOGY	2
185	2011_185	2011	21	L1-01 TINGKAT 1 QUATERS BOMBA 45300 SUNGAI BESAR		3.6754	100.986	3.675398, 100.9857899	Alive	Malay	Citizen	Male	MALAYSIA	Single/Sporadic	Lab confirmed Positive	Passive	SEROLOGY	2
75	2011_75	2011	59	NO 645 SUNGAI DALAM 42940 PULAU KETAM SELANGOR DARUL EHSAN		3.03341	101.247	3.0334114, 101.2467116	Alive	Chinese	Citizen	Male	MALAYSIA	Single/Sporadic	Lab confirmed Positive	Passive	SEROLOGY	2
76	2011_76	2011	24	NO. 2, JALAN KASPAN 2B/KU8, TAMAN MERU MAKMUR, MERU, KLANG		3.13026	101.433	3.130259, 101.4334481	Alive	Malay	Citizen	Female	MALAYSIA	Single/Sporadic	Lab confirmed Positive	Passive	SEROLOGY	2
131	2011_131	2011	73	5,JLN IDAMAN,TMN DESA IDAMAN,KG.OLAK LEMPIT,BANTING		2.8373	101.582	2.8372967, 101.5822643	Deceased	Malay	Citizen	Male	MALAYSIA	Single/Sporadic	Lab confirmed Positive	Passive	ELISA	3
11	2011_11	2011	20	LOT 6F,KG LAKSAMANA,BATU CAVES		3.24692	101.68	3.246923, 101.679773	Alive	Indian	Citizen	Male	MALAYSIA	Single/Sporadic	Lab confirmed Positive	Passive	SEROLOGY	3
172	2011_172	2011	26	BLOK 2054 G8, PINTU 2 RKAT KEM PAYA JARAS, SG BULOH		3.20144	101.554	3.2014361, 101.5539037	Alive	Malay	Citizen	Male	MALAYSIA	Single/Sporadic	Lab confirmed Positive	Passive	SEROLOGY	3
200	2011_200	2011	55	LOT 1773 JALAN CERI TAMAN RAYA SG BESAR		3.67556	100.981	3.6755634, 100.9813961	Alive	Malay	Citizen	Female	MALAYSIA	Single/Sporadic	Lab confirmed Positive	Passive	PCR	3
106	2011_106	2011	24	LOT 970, JLN BATU 37, KG KUNDANG, tanjong sepat		2.67321	101.543	2.6732092, 101.5429212	Alive	Malay	Citizen	Male	MALAYSIA	Single/Sporadic	Lab confirmed Positive	Passive	ELISA	3
74	2011_74	2011	7	NO 22-2-20 SRI NERVILLIA APT KOTA KEMUNING 40000 SHAH ALAM SELANGOR DARUL EHSAN		2.98409	101.551	2.984092, 101.550783	Alive	Malay	Citizen	Female	MALAYSIA	Single/Sporadic	Lab confirmed Positive	Passive	SEROLOGY	3
9	2011_9	2011	31	P1-1-3A,GARDEN VILLA,JLN SH2/1,SELAYANG HEIGHT,SELAYANG		3.27106	101.653	3.2710553, 101.6526219	Alive	Indian	Citizen	Male	MALAYSIA	Single/Sporadic	Lab confirmed Positive	Passive	SEROLOGY	3
162	2011_162	2011	15	19,JLN BELATI 19/32A,SEK.19,SHAH ALAM		3.04865	101.534	3.048653, 101.5343561	Alive	Malay	Citizen	Male	MALAYSIA	Single/Sporadic	Lab confirmed Positive	Passive	SEROLOGY	3
194	2011_194	2011	15	LOT 441, KAMPUNG BATU 37 BARAT, SABAK BERNAM		3.7696	100.984	3.769601, 100.9836551	Alive	Malay	Citizen	Male	MALAYSIA	Single/Sporadic	Lab confirmed Positive	Passive	PCR	3
246	2011_246	2011	25	UP 2 UKAY PERDANA AMPANG PERDANA		3.20842	101.782	3.2084159, 101.7815913	Alive	Malay	Citizen	Male	MALAYSIA	Single/Sporadic	Lab confirmed Positive	Passive	SEROLOGY	3
19	2011_19	2011	55	A17 JALAN KUALA GARING RAWANG, 48000 SELANGOR		3.32737	101.562	3.3273682, 101.5615359	Alive	Indian	Citizen	Male	MALAYSIA	Single/Sporadic	Lab confirmed Positive	Passive	SEROLOGY	3
73	2011_73	2011	13	LOT 1959 JLN NENAS MERU KLANG		3.1419	101.425	3.1418996, 101.4247752	Alive	Malay	Citizen	Male	MALAYSIA	Single/Sporadic	Lab confirmed Positive	Passive	SEROLOGY	3
260	2011_260	2011	30	A-12-3 PANGSAPURI KENANGA SARI, 17/56		3.18214	101.754	3.1821395, 101.7542099	Alive	Malay	Citizen	Male	MALAYSIA	Single/Sporadic	Lab confirmed Positive	Passive	SEROLOGY	3
135	2011_135	2011	76	LOT 2629, JALAN KENANGA, TANJONG KARANG		3.43169	101.202	3.431689, 101.202471	Alive	Malay	Citizen	Male	MALAYSIA	Single/Sporadic	Lab confirmed Positive	Active	SEROLOGY	4
143	2011_143	2011	18	NO.10A,JLN RENANG 13/26,SEK.13,SHAH ALAM		3.08801	101.545	3.088011, 101.544728	Alive	Malay	Citizen	Male	MALAYSIA	Single/Sporadic	Lab confirmed Positive	Passive	SEROLOGY	4
92	2011_92	2011	51	NO.10,LOT 518,JLN TELOK GADONG KECIL,KLANG		3.03502	101.422	3.0350192, 101.4215899	Alive	Malay	Citizen	Female	MALAYSIA	Single/Sporadic	Lab confirmed Positive	Passive	SEROLOGY	4
138	2011_138	2011	49	NO.12,LRG 13, LDG SELANGOR RIVER, KG. KUANTAN		3.36116	101.3	3.361159, 101.2999792	Alive	Malay	Citizen	Female	MALAYSIA	Single/Sporadic	Lab confirmed Positive	Passive	SEROLOGY	4
247	2011_247	2011	27	BLOK JADE 2-3-04 JLN SRI MERDEKA 1,TMN SRI MERDEKA,AMPANG		3.14026	101.768	3.1402606, 101.7683491	Alive	Malay	Citizen	Male	MALAYSIA	Single/Sporadic	Lab confirmed Positive	Passive	SEROLOGY	4
72	2011_72	2011	27	03-02-06 JALAN MANTAP 25/126 TAMAN SERI LEMBAYUNG SHAH ALAM SELANGOR DARUL EHSAN		3.02505	101.528	3.0250507, 101.5284881	Alive	Malay	Citizen	Female	MALAYSIA	Single/Sporadic	Lab confirmed Positive	Passive	SEROLOGY	4
139	2011_139	2011	18	121 U, JLN DC 5/6, TAMAN DESA COALFIELDS TOWN HOUSE		3.23656	101.486	3.2365614, 101.4855729	Alive	Indian	Citizen	Male	MALAYSIA	Single/Sporadic	Lab confirmed Positive	Passive	SEROLOGY	4
226	2011_226	2011	46	NO17,JLN TENTERAM 4,TMN KAJANG UTAMA		2.97209	101.795	2.97209, 101.7953573	Alive	Malay	Citizen	Female	MALAYSIA	Single/Sporadic	Lab confirmed Positive	Passive	SEROLOGY	4
167	2011_167	2011	20	LOT 911B LRG MELOR,KG SUNGAI KAYU ARA,DAMANSARA UTAMA,PJ		3.13267	101.612	3.132667, 101.611863	Alive	Malay	Citizen	Male	MALAYSIA	Single/Sporadic	Lab confirmed Positive	Passive	SEROLOGY	4
269	2011_269	2011	26	8-C,JLN WAWASAN,BANDAR BARU AMPANG		3.13995	101.77	3.1399491, 101.7697102	Alive	Foreigners	Non-citizen	Male	PAKISTAN	Single/Sporadic	Lab confirmed Positive	Passive	SEROLOGY	4
165	2011_165	2011	9	B 310 TAMAN SUBANG IMPIAN JLN ZUHAL U5/177 SHAH ALAM		3.15801	101.552	3.1580065, 101.5515672	Alive	Malay	Citizen	Female	MALAYSIA	Single/Sporadic	Lab confirmed Positive	Passive	SEROLOGY	4
157	2011_157	2011	21	WISMA JUARA NO 24 JLN PUTRA PERDANA 312 TMN PUTRA PERDANA PUCHONG		2.93993	101.608	2.9399327, 101.6083865	Alive	Foreigners	Non-citizen	Male	INDONESIA	Single/Sporadic	Lab confirmed Positive	Passive	SEROLOGY	4
178	2011_178	2011	32	PT 1869 A, JALAN 2, BAGAN SUNGAI BESAR		3.67449	100.982	3.67449, 100.982484	Alive	Foreigners	Non-citizen	Male	MYANMAR	Single/Sporadic	Lab confirmed Positive	Passive	PCR	4
2	2011_2	2011	24	02-68, PANGSAPURI OAKWOOD COURT BANDAR TASIK PUTERI RAWANG		3.2843	101.474	3.284304, 101.474379	Alive	Indian	Citizen	Male	MALAYSIA	Single/Sporadic	Lab confirmed Positive	Passive	SEROLOGY	4
137	2011_137	2011	44	29B ,TAMAN SERI JAYA,45500 TANJONG KARANG		3.42377	101.169	3.4237738, 101.1692629	Deceased	Malay	Citizen	Male	MALAYSIA	Single/Sporadic	Lab confirmed Positive	Passive	SEROLOGY	4
297	2011_297	2011	9	53 JLN ROS 1B BKT SENTOSA		3.37612	101.568	3.3761233, 101.5682608	Alive	Malay	Citizen	Male	MALAYSIA	Single/Sporadic	Lab confirmed Positive	Passive	SEROLOGY	4
69	2011_69	2011	6	LOT 6012 A25 LOTONG BATU 6 BUKIT NAGA 42100 KLANG SELANGOR DARUL EHSAN		3.04485	101.445	3.0448516, 101.44471	Alive	Foreigners	Non-citizen	Female	BANGLADESH	Single/Sporadic	Lab confirmed Positive	Passive	SEROLOGY	5
174	2011_174	2011	22	26-1-B PANGSAPURI ILHAM TAMAN TTDI JAYA, SEKSYEN U2, SHAH ALAM, SELANGOR		3.10133	101.552	3.101328, 101.551938	Alive	Malay	Citizen	Male	MALAYSIA	Single/Sporadic	Lab confirmed Positive	Passive	SEROLOGY	5
190	2011_190	2011	18	B 534 KEBUN BARU, KG TEBUK JAWA, SABAK BERNAM		3.756	100.9	3.7559979, 100.9000352	Alive	Malay	Citizen	Male	MALAYSIA	Single/Sporadic	Lab confirmed Positive	Passive	SEROLOGY	5
228	2011_228	2011	21	KOLEJ AMINUDIN BAKI UNIVERSITI KEBANGSAAN MALAYSIA BANGI		2.92892	101.78	2.9289226, 101.7800233	Alive	Malay	Citizen	Male	MALAYSIA	Single/Sporadic	Lab confirmed Positive	Passive	SEROLOGY	5
16	2011_16	2011	10	NO 84 LORONG 6 SG SERAI, KUANG RAWANG		3.31008	101.588	3.3100828, 101.5875012	Alive	Malay	Citizen	Male	MALAYSIA	Single/Sporadic	Lab confirmed Positive	Passive	SEROLOGY	5
252	2011_252	2011	22	C-9-7 SRI PANDAN MEWAH, TAMAN PANDAN MEWAH, AMPANG		3.12772	101.763	3.1277239, 101.7625349	Alive	Malay	Citizen	Male	MALAYSIA	Single/Sporadic	Lab confirmed Positive	Passive	SEROLOGY	5
12	2011_12	2011	50	A-03-4-20 JALAN SAMUDRA TIMUR 7,TAMAN SAMUDRA,GOMBAK,BT CAVES		3.23535	101.699	3.2353525, 101.6989884	Alive	Malay	Citizen	Male	MALAYSIA	Single/Sporadic	Lab confirmed Positive	Passive	SEROLOGY	5
208	2011_208	2011	71	BUMI HIJAU, SUNGAI PANJANG SABAK BERNAM, SELANGOR		3.75484	100.908	3.754842, 100.9075559	Deceased	Malay	Citizen	Male	MALAYSIA	Single/Sporadic	Lab confirmed Positive	Passive	PCR	5
211	2011_211	2011	23	KILANG WRP, LOT 1JALAN 3, KAWASAN PERUSAHAAN BANDAR BARU SEPANG		2.69137	101.751	2.691369, 101.7505271	Alive	Foreigners	Non-citizen	Female	NEPAL	Single/Sporadic	Lab confirmed Positive	Passive	SEROLOGY	5
274	2011_274	2011	23	16, SKC BERNAM SECTION, ULU SELANGOR, KUALA SELANGOR		3.34018	101.25	3.340184, 101.249762	Alive	Indian	Citizen	Female	MALAYSIA	Single/Sporadic	Lab confirmed Positive	Passive	SEROLOGY	5
222	2011_222	2011	1	RUMAH B, BT 20 1/2 KG SG LUI HULU LANGAT		3.1629	101.887	3.1629009, 101.8867913	Deceased	Malay	Citizen	Male	MALAYSIA	Single/Sporadic	Lab confirmed Positive	Passive	SEROLOGY	5
3	2011_3	2011	56	B-1-19, PERDANA VILLA APT JLN SG JATI, Taman Sentosa Perdana,		3.00608	101.487	3.0060752, 101.4870725	Alive	Malay	Citizen	Female	MALAYSIA	Single/Sporadic	Lab confirmed Positive	Passive	SEROLOGY	5
67	2011_67	2011	23	4 JLN MERANTI PUTEH 1 TMN DESA PERMAI MERU		3.14725	101.438	3.1472511, 101.4381949	Alive	Malay	Citizen	Male	MALAYSIA	Single/Sporadic	Lab confirmed Positive	Passive	ELISA	5
68	2011_68	2011	32	NO 72 JLN HJ YAKUB 23 TMN KAPAR PERMAI		3.14871	101.372	3.148711, 101.372472	Alive	Indian	Citizen	Male	MALAYSIA	Single/Sporadic	Lab confirmed Positive	Passive	SEROLOGY	5
71	2011_71	2011	45	NO 32A-02-1 LORONG NILAM 1C BANDAR BUKIT TINGGI KLANG SELANGOR DARUL EHSAN		3.01029	101.439	3.0102935, 101.438933	Alive	Malay	Citizen	Male	MALAYSIA	Single/Sporadic	Lab confirmed Positive	Passive	SEROLOGY	5
82	2011_82	2011	17	LOT 1357 Jalan Uganda Kampung Jawa, Klang, 41000, Klang, Selangor		3.03005	101.459	3.0300544, 101.4592151	Alive	Malay	Citizen	Male	MALAYSIA	Single/Sporadic	Lab confirmed Positive	Passive	SEROLOGY	5
144	2011_144	2011	10	6C BLOK 10 FLAT PKNS SEK 16 SHAH ALAM SELANGOR DARUL EHSAN		3.07328	101.518	3.073281, 101.518461	Alive	Malay	Citizen	Male	MALAYSIA	Single/Sporadic	Lab confirmed Positive	Passive	SEROLOGY	5
25	2011_25	2011	43	60 JALAN RP 10/6, TAMAN RAWANG PERDANA, RAWANG 48000 SELANGOR		3.32763	101.588	3.3276273, 101.5882232	Alive	Indian	Citizen	Male	MALAYSIA	Single/Sporadic	Lab confirmed Positive	Passive	SEROLOGY	5
70	2011_70	2011	22	BATU 8 1/2 KAMPUNG PEREPAT 42200 KAPAR SELANGOR DARUL EHSAN		3.10388	101.366	3.103877, 101.3659135	Alive	Malay	Citizen	Male	MALAYSIA	Single/Sporadic	Lab confirmed Positive	Passive	SEROLOGY	5
258	2011_258	2011	44	LOT 164, JALAN PERMAI 7, KG TASEK PERMAI, AMPANG		3.12678	101.777	3.1267798, 101.7767447	Alive	Malay	Citizen	Male	MALAYSIA	Single/Sporadic	Lab confirmed Positive	Passive	SEROLOGY	5
66	2011_66	2011	35	B-1-40 FLAT CEMPAKA JALAN PERSIARAN BUKIT RAJA 41150 KLANG SELANGOR DARUL EHSAN		3.05927	101.474	3.0592661, 101.4736467	Alive	Malay	Citizen	Male	MALAYSIA	Single/Sporadic	Lab confirmed Positive	Passive	PCR	5
146	2011_146	2011	27	21-4-11 P'PURI KIAMBANG, TMN BKT SUBANG SHAH ALAM		3.17092	101.517	3.1709221, 101.516572	Alive	Malay	Citizen	Male	MALAYSIA	Single/Sporadic	Lab confirmed Positive	Passive	SEROLOGY	5
220	2011_220	2011	23	MCA-211 JLN PINGGIRAN DELIMA, TMN PINGGIRAN DELIMA, HULU LANGAT 43100 SELANGOR		3.12261	101.81	3.122606, 101.8095491	Alive	Malay	Citizen	Male	MALAYSIA	Single/Sporadic	Lab confirmed Positive	Passive	SEROLOGY	5
240	2011_240	2011	22	G-20 BLK KENARI D,JLN TEMBUSU 4,TMN IMPIAN EHSAN,BALAKONG		3.01876	101.754	3.018758, 101.7544162	Alive	Malay	Citizen	Male	MALAYSIA	Single/Sporadic	Lab confirmed Positive	Passive	SEROLOGY	5
249	2011_249	2011	10	264 LORONG PERMAI 10, KG TASEK PERMAI, AMPANG		3.12912	101.779	3.1291244, 101.7793836	Alive	Indian	Citizen	Female	MALAYSIA	Single/Sporadic	Lab confirmed Positive	Passive	SEROLOGY	5
64	2011_64	2011		LOT 6150 JLN HAJI ABDUL MANAN BATU 5 1/5 JLN MERU, klang		3.11243	101.438	3.112431, 101.4384723	Alive	Foreigners	Non-citizen	Male	MYANMAR	Single/Sporadic	Lab confirmed Positive	Passive	MAT	5
65	2011_65	2011	20	NO 53 JALAN CERMAT 25/36 TAMAN SRI MUDA 40400 SHAH ALAM SELANGOR DARUL EHSAN		3.03466	101.538	3.0346578, 101.5375429	Alive	Malay	Citizen	Male	MALAYSIA	Single/Sporadic	Lab confirmed Positive	Passive	SEROLOGY	5
158	2011_158	2011	22	PROSPEED CHAY SERVICES SDN BHD,JLN PUCHONG		3.03272	101.619	3.0327152, 101.618802	Alive	Foreigners	Non-citizen	Male	MYANMAR	Single/Sporadic	Lab confirmed Positive	Passive	SEROLOGY	5
63	2011_63	2011	37	LOT 2390 JLN BATU BATA DESA KEMUNING SEK 35 SHAH ALAM		3.01789	101.525	3.0178919, 101.524671	Alive	Foreigners	Non-citizen	Female	INDONESIA	Single/Sporadic	Lab confirmed Positive	Passive	SEROLOGY	5
250	2011_250	2011	22	NO.2B JLN WAWASAN 4/5 BANDAR BARU AMPANG		3.14627	101.765	3.146272, 101.7653331	Alive	Foreigners	Non-citizen	Male	BANGLADESH	Single/Sporadic	Lab confirmed Positive	Passive	SEROLOGY	5
293	2011_293	2011	32	459 KG SG MASIN, BATANG KALI		3.46516	101.66	3.465158, 101.6596379	Alive	Malay	Citizen	Male	MALAYSIA	Single/Sporadic	Lab confirmed Positive	Passive	PCR	5
192	2011_192	2011	84	NO 4 JALAN MASJID KAMPUNG BANTING SABAK BERNAM		3.75629	100.953	3.7562895, 100.9527256	Alive	Malay	Citizen	Male	MALAYSIA	Single/Sporadic	Lab confirmed Positive	Passive	PCR	5
87	2011_87	2011	34	NO.1-D,LORONG BATU NILAM,BDR BKT TINGGI,KLANG		3.00554	101.43	3.005536, 101.429863	Alive	Malay	Citizen	Male	MALAYSIA	Single/Sporadic	Lab confirmed Positive	Passive	SEROLOGY	5
160	2011_160	2011	27	V1-42A JLN PLUMBUM V7/V PUSAT KOMERSIAL SEK 7 SHAH ALAM		3.06498	101.49	3.064978, 101.4902394	Alive	Malay	Citizen	Male	MALAYSIA	Single/Sporadic	Lab confirmed Positive	Passive	SEROLOGY	5
13	2011_13	2011	24	NO 14 , TINGKAT 5 BLOK A FLAT TAMAN SAMUDERA		3.23309	101.698	3.233091, 101.6977838	Alive	Malay	Citizen	Male	MALAYSIA	Single/Sporadic	Lab confirmed Positive	Passive	SEROLOGY	5
62	2011_62	2011	34	7 SOLOK MESRA 5 TMN CHI LIUNG KLANG		3.01356	101.425	3.0135555, 101.4251154	Alive	Chinese	Citizen	Male	MALAYSIA	Single/Sporadic	Lab confirmed Positive	Passive	MAT	5
253	2011_253	2011	53	NO 6/3F TINGKAT 3,JLN MULIA 3/1 TAMAN MULIA JAYA 68000 AMPANG SELANGOR.		3.13309	101.79	3.1330908, 101.7895149	Alive	Indian	Citizen	Male	MALAYSIA	Single/Sporadic	Lab confirmed Positive	Passive	SEROLOGY	5
266	2011_266	2011	19	LOT 1518 JLN INDAH 2, KG AMPANG INDAH 68000 AMPANG		3.13686	101.784	3.1368582, 101.7842276	Alive	Malay	Citizen	Male	MALAYSIA	Single/Sporadic	Lab confirmed Positive	Passive	SEROLOGY	5
267	2011_267	2011	13	04-15 PANGSAPURI SRI INTAN, TMN SRI INTAN, LEMBAH JAYA SELATAN, AMPANG		3.13805	101.782	3.13805, 101.781722	Alive	Malay	Citizen	Male	MALAYSIA	Single/Sporadic	Lab confirmed Positive	Passive	SEROLOGY	5
81	2011_81	2011	18	LOT 498-B,JLN YADI OFF SG BERTEK,TELOK GADONG,KLANG		3.03952	101.416	3.0395221, 101.4162687	Alive	Malay	Citizen	Female	MALAYSIA	Single/Sporadic	Lab confirmed Positive	Passive	ELISA	5
259	2011_259	2011	15	35 JALAN 14, KAMPUNG BARU AMPANG 68000 AMPANG SELANGOR.		3.1352	101.76	3.1351985, 101.7596353	Alive	Chinese	Citizen	Female	MALAYSIA	Single/Sporadic	Lab confirmed Positive	Passive	SEROLOGY	5
296	2011_296	2011	31	720 JALAN KUALA KALI, RASA		3.49446	101.63	3.494457, 101.6296307	Alive	Indian	Citizen	Male	MALAYSIA	Single/Sporadic	Lab confirmed Positive	Passive	PCR	5
61	2011_61	2011	53	NO 5,LOT 2862 JLN LIMAU MERU KLANG		3.15373	101.431	3.1537256, 101.4314972	Alive	Malay	Citizen	Male	MALAYSIA	Single/Sporadic	Lab confirmed Positive	Passive	MAT	6
95	2011_95	2011	18	MAAHAD HAFIZ KLANG, WISMA HAFIZ JLN BATU TIGA		3.04647	101.449	3.0464737, 101.4493266	Alive	Malay	Citizen	Male	MALAYSIA	Cluster/Outbreak	Lab confirmed Positive	Passive	MAT	6
101	2011_101	2011	24	NO 10, BLOCK C, JLN IKLIM 25/83,SYEKSEN 25 TMN SRI MUDA		3.03173	101.535	3.03173, 101.534841	Alive	Malay	Citizen	Female	MALAYSIA	Single/Sporadic	Lab confirmed Positive	Passive	ELISA	6
173	2011_173	2011	20	KOLEJ KEMAHIRAN TINGGI MARA,NO.12 JLN TEMPLER		3.09121	101.65	3.0912106, 101.6502459	Alive	Malay	Citizen	Male	MALAYSIA	Single/Sporadic	Lab confirmed Positive	Passive	SEROLOGY	6
264	2011_264	2011	31	BLOK L21A 306 PERSIARAN PANDAN 4 PANDAN JAYA		3.13598	101.743	3.1359796, 101.7427778	Alive	Malay	Citizen	Male	MALAYSIA	Single/Sporadic	Lab confirmed Positive	Passive	SEROLOGY	6
60	2011_60	2011	20	NO 58 JLJN NAKHODA YUSUF 3 TMN NAKHODA YUSUF		3.03167	101.457	3.0316652, 101.4566077	Alive	Malay	Citizen	Male	MALAYSIA	Single/Sporadic	Lab confirmed Positive	Passive	ELISA	6
59	2011_59	2011	23	LOT 16 TAMAN DESA TERATAI UTAMA TELOK GONG PELABUHAN KLANG SELANGOR DARUL EHSAN		2.93557	101.368	2.935572, 101.3682681	Alive	Malay	Citizen	Male	MALAYSIA	Single/Sporadic	Lab confirmed Positive	Passive	SEROLOGY	6
4	2011_4	2011	21	NO.12, RUMAH KEDAI TAMAN GREENWOOD, BATU CAVES		3.23325	101.705	3.2332475, 101.7046945	Alive	Malay	Citizen	Male	MALAYSIA	Single/Sporadic	Lab confirmed Positive	Passive	SEROLOGY	6
155	2011_155	2011	42	NO.11, PINGGIRAN PUTRA PERMAI, TINGKAT 4		2.99336	101.676	2.9933589, 101.6762318	Alive	Malay	Citizen	Male	MALAYSIA	Single/Sporadic	Lab confirmed Positive	Passive	SEROLOGY	6
256	2011_256	2011	53	NO.1 JLN 5 LEMBAH JAYA UTARA, AMPANG		3.13923	101.782	3.1392298, 101.7818502	Alive	Malay	Citizen	Male	MALAYSIA	Single/Sporadic	Lab confirmed Positive	Passive	SEROLOGY	6
263	2011_263	2011	22	5324, PANGSAPURI INTAN, JALAN BUKIT PERMAI, TAMAN BUKIT PERMAI, CHERAS		3.11136	101.759	3.1113553, 101.7588674	Alive	Malay	Citizen	Male	MALAYSIA	Single/Sporadic	Lab confirmed Positive	Passive	MAT	6
284	2011_284	2011	24	Jalan Tunku Abdul Rahman Yaakop, Taman Juta, 44000 Kuala Kubu Baru, Selangor		3.57314	101.656	3.573137, 101.6559954	Alive	Malay	Citizen	Male	MALAYSIA	Cluster/Outbreak	Lab confirmed Positive	Passive	PCR	6
57	2011_57	2011	34	NO 5 SOLOK ISKANDAR 1B TMN ISKANDAR KG BKT ISKANDAR KAPAR		3.16133	101.437	3.1613266, 101.4366182	Alive	Malay	Citizen	Male	MALAYSIA	Single/Sporadic	Lab confirmed Positive	Passive	ELISA	6
58	2011_58	2011	29	67 JLN SEMANGAT 25/8 TMN SRI MUDA SHAH ALAM		3.03037	101.534	3.0303674, 101.5340652	Alive	Malay	Citizen	Male	MALAYSIA	Single/Sporadic	Lab confirmed Positive	Passive	ELISA	6
21	2011_21	2011	45	126 LORONG SERAI 6,KG SG SERAI,KUANG, RAWANG		3.2853	101.546	3.2852964, 101.5464785	Alive	Foreigners	Non-citizen	Male	INDONESIA	Single/Sporadic	Lab confirmed Positive	Passive	SEROLOGY	6
22	2011_22	2011	23	4 JLN GU 1/9 TMN GARING UTAMA		3.34402	101.557	3.3440172, 101.5566603	Alive	Indian	Citizen	Male	MALAYSIA	Single/Sporadic	Lab confirmed Positive	Passive	SEROLOGY	6
56	2011_56	2011	23	44 LRG SETIA 1G TMN JOHAN SETIA		2.97554	101.484	2.9755422, 101.4837105	Alive	Malay	Citizen	Male	MALAYSIA	Single/Sporadic	Lab confirmed Positive	Passive	ELISA	6
94	2011_94	2011	14	135,JLN SERULING 44,KAW.3,TMN KLANG JAYA,KLANG		3.00786	101.451	3.0078592, 101.4510659	Alive	Malay	Citizen	Male	MALAYSIA	Single/Sporadic	Lab confirmed Positive	Passive	ELISA	6
214	2011_214	2011	20	BLOK A4 ASRAMA GMI GERMAN MALAYSIA INSTITUT JALAN ILMIAH TAMAN UNIVERSITI BANGI SELANGOR		2.93314	101.798	2.933142, 101.7980111	Alive	Malay	Citizen	Male	MALAYSIA	Single/Sporadic	Lab confirmed Positive	Passive	SEROLOGY	6
295	2011_295	2011	24	3 JLN DAMAR `4 TAMAN RASA INDAH, RASA, SELANGOR		3.49901	101.637	3.4990111, 101.6372522	Alive	Indian	Citizen	Male	MALAYSIA	Single/Sporadic	Lab confirmed Positive	Passive	MAT	6
27	2011_27	2011	58	LOT 2326 NO 5A KAMPUNG TENGAH TAMBAHAN KM 16, TAMAN MELATI GOMBAK		3.23187	101.718	3.231866, 101.7182048	Alive	Others	Citizen	Female	MALAYSIA	Single/Sporadic	Lab confirmed Positive	Passive	SEROLOGY	6
164	2011_164	2011	13	NO 24 JALAN TUNTUNG 20/11 SEK 20 40300 SHAH ALAM SELANGOR DARUL EHSAN		3.05199	101.537	3.051985, 101.5370829	Alive	Malay	Citizen	Male	MALAYSIA	Single/Sporadic	Lab confirmed Positive	Passive	SEROLOGY	6
184	2011_184	2011	38	37 A, JALAN MENTERI, SG BESAR, SELANGOR		3.67599	100.986	3.6759873, 100.9863091	Alive	Foreigners	Non-citizen	Male	BANGLADESH	Single/Sporadic	Lab confirmed Positive	Passive	PCR	6
55	2011_55	2011	22	A-05-02 PANGSAPURI RIMBA KG PADANG JAWA		3.05434	101.483	3.0543382, 101.4825585	Alive	Malay	Citizen	Male	MALAYSIA	Single/Sporadic	Lab confirmed Positive	Passive	ELISA	6
261	2011_261	2011	47	BLOK E28, TAMAN DATO AHMAD RAZALI, JLN AMPANG		3.15675	101.752	3.156748, 101.7520628	Alive	Malay	Citizen	Male	MALAYSIA	Single/Sporadic	Lab confirmed Positive	Passive	SEROLOGY	6
277	2011_277	2011	39	P-L-6-13 APT DAHLIA, TAMAN BUNGA RAYA, RAWANG		3.44077	101.552	3.44077, 101.551644	Alive	Malay	Citizen	Male	MALAYSIA	Single/Sporadic	Lab confirmed Positive	Passive	PCR	6
18	2011_18	2011	11	LOT 2529 D LRG TANJUNG, KG DAMAI KUANG, Sungai Buloh		3.23487	101.543	3.2348691, 101.5425186	Alive	Malay	Citizen	Female	MALAYSIA	Single/Sporadic	Lab confirmed Positive	Passive	SEROLOGY	6
183	2011_183	2011	54	NO 20 TAMAN PENGAWA JALAN PENGAWA 1 SUNGAI BESAR		3.68051	100.983	3.6805094, 100.9829283	Alive	Malay	Citizen	Male	MALAYSIA	Single/Sporadic	Lab confirmed Positive	Passive	PCR	6
20	2011_20	2011	52	LOT 99A BATU 13 1/2, KAMPUNG MELAYU SUNGAI BULOH, 47000 SELANGOR		3.2195	101.573	3.2195011, 101.5734842	Alive	Malay	Citizen	Male	MALAYSIA	Single/Sporadic	Lab confirmed Positive	Passive	SEROLOGY	6
251	2011_251	2011	24	NO 24 C JLN PANDAN MEWAH, PANDAN MEWAH 68000 AMPANG SELANGOR.		3.12642	101.763	3.1264192, 101.7632746	Alive	Foreigners	Non-citizen	Male	BANGLADESH	Single/Sporadic	Lab confirmed Positive	Passive	SEROLOGY	6
54	2011_54	2011		16 LORONG MESRA 8 TAMAN CHI LIUNG 42000 PELABUHAN KLANG SELANGOR DARUL EHSAN		3.01604	101.426	3.0160392, 101.4262345	Alive	Foreigners	Non-citizen	Male	INDIA	Single/Sporadic	Lab confirmed Positive	Passive	ELISA	6
199	2011_199	2011	52	NO 77 LORONG 5,TAMAN MUHIBAH,SABAK BERNAM		3.67237	100.976	3.6723722, 100.9758719	Alive	Indian	Citizen	Male	MALAYSIA	Single/Sporadic	Lab confirmed Positive	Passive	PCR	6
52	2011_52	2011		NO 57B JALAN MAKMUR 25/64 TAAN SRI MUDA 40400 SHAH ALAM SELANGOR DARUL EHSAN		3.03246	101.537	3.032455, 101.537125	Alive	Foreigners	Non-citizen	Male	NEPAL	Single/Sporadic	Lab confirmed Positive	Passive	ELISA	6
53	2011_53	2011	15	NO 29 LORONG BATU UNJUR 3B TAMAN BAYU PERDANA 41200 KLANG SELANGOR DARUL EHSAN		3.01867	101.438	3.0186659, 101.4378897	Alive	Indian	Citizen	Male	MALAYSIA	Single/Sporadic	Lab confirmed Positive	Passive	SEROLOGY	6
202	2011_202	2011	40	SIMPANG 4 BAGAN NAKHODA OMAR SABAK BERNAM		3.77583	100.882	3.7758344, 100.8820506	Alive	Malay	Citizen	Male	MALAYSIA	Single/Sporadic	Lab confirmed Positive	Passive	PCR	7
292	2011_292	2011	64	28 KG MENYOROK, BATANG KALI		3.46014	101.655	3.4601368, 101.6550138	Alive	Chinese	Citizen	Male	MALAYSIA	Single/Sporadic	Lab confirmed Positive	Passive	PCR	7
5	2011_5	2011	18	NO.97 JLN SG 9/8 TMN SRI GOMBAK,BT CAVES		3.252	101.699	3.2520032, 101.6985471	Alive	Indian	Citizen	Male	MALAYSIA	Single/Sporadic	Lab confirmed Positive	Passive	SEROLOGY	7
83	2011_83	2011	29	LOT1378, Lorong Hj Yusof, Kampung Jawa, Klang, 41000, Klang, Selangor		3.02335	101.46	3.0233505, 101.4602196	Alive	Malay	Citizen	Female	MALAYSIA	Single/Sporadic	Lab confirmed Positive	Passive	SEROLOGY	7
268	2011_268	2011	31	BLOK A 18-01 TAMAN INDUSTRI,LEMBAH JAYA SELATAN,AMPANG		3.14033	101.783	3.1403315, 101.7826484	Alive	Malay	Citizen	Female	MALAYSIA	Single/Sporadic	Lab confirmed Positive	Passive	SEROLOGY	7
15	2011_15	2011	15	NO 8 JALAN JU 10, TAMAN JASA UTAMA, 68100 BATU CVAES SELANGOR		3.27081	101.682	3.270813, 101.681537	Alive	Foreigners	Non-citizen	Male	INDONESIA	Single/Sporadic	Lab confirmed Positive	Passive	PCR	7
50	2011_50	2011	4	E7006 BLOK B APT KLANG VILLA JLN SABAH PANDAMARAN		3.00987	101.41	3.0098706, 101.4096319	Alive	Pribumi Sabah	Citizen	Male	MALAYSIA	Single/Sporadic	Lab confirmed Positive	Passive	ELISA	7
182	2011_182	2011	13	35C BT 6 1/2, SG LIAS 45300 SG BESAR, SELANGOR		3.68473	100.971	3.684729, 100.9713269	Alive	Malay	Citizen	Male	MALAYSIA	Single/Sporadic	Lab confirmed Positive	Passive	SEROLOGY	7
241	2011_241	2011	35	D-04-23 TMN CHERAS UTAMA,CHERAS		3.04674	101.747	3.046742, 101.746886	Alive	Malay	Citizen	Male	MALAYSIA	Single/Sporadic	Lab confirmed Positive	Passive	SEROLOGY	7
51	2011_51	2011	35	NO 7 JLN DATO DAGANG 42 TMN SRI SENTOSA		2.99566	101.479	2.9956553, 101.4786492	Alive	Malay	Citizen	Female	MALAYSIA	Single/Sporadic	Lab confirmed Positive	Passive	ELISA	7
153	2011_153	2011	16	E-08-17 MENTARI COURT TAMAN SERI MENTARI,JLN PJS 8/9 BANDAR SUNWAY.		3.08134	101.611	3.0813392, 101.6105336	Alive	Malay	Citizen	Male	MALAYSIA	Single/Sporadic	Lab confirmed Positive	Passive	SEROLOGY	7
49	2011_49	2011		1 JLN PASAR BARU 2 OFF JLN MERU		3.1334	101.441	3.1334027, 101.4410127	Alive	Foreigners	Non-citizen	Male	INDIA	Single/Sporadic	Lab confirmed Positive	Passive	MAT	7
102	2011_102	2011	55	LOT 4048,BATU 7,JLN KEBUN,KLANG		2.97279	101.524	2.972785, 101.5242732	Alive	Malay	Citizen	Female	MALAYSIA	Single/Sporadic	Lab confirmed Positive	Passive	ELISA	7
203	2011_203	2011	21	NO. 4, TEBUK HAJI DOLAH, PARIT BARU, SABAK BERNAM		3.80222	100.812	3.8022222, 100.8122222	Alive	Malay	Citizen	Male	MALAYSIA	Single/Sporadic	Lab confirmed Positive	Passive	PCR	7
105	2011_105	2011	29	LOT 1252,BATU 8,BUKIT KEMUNING,KLANG		3.00808	101.513	3.0080792, 101.5131345	Alive	Pribumi Sarawak	Citizen	Male	MALAYSIA	Single/Sporadic	Lab confirmed Positive	Passive	ELISA	7
134	2011_134	2011		2-4 JLN BAGAN SUNGAI BULOH JERAM		3.25758	101.304	3.2575838, 101.3042473	Alive	Foreigners	Non-citizen	Male	BANGLADESH	Single/Sporadic	Lab confirmed Positive	Passive	MAT	7
276	2011_276	2011	35	NO 15, KG GESIR HULU, SUNGA SELISEK, KUALA KUBU BARU, SELANGOR		3.56093	101.659	3.560932, 101.658546	Alive	Malay	Citizen	Female	MALAYSIA	Single/Sporadic	Lab confirmed Positive	Passive	SEROLOGY	7
46	2011_46	2011		NO 22 JALAN MOHD TAHIR 2 TAMAN SUNGAI JATI 41200 KLANG SELANGOR DARUL EHSAN		3.01215	101.463	3.0121537, 101.4633937	Alive	Foreigners	Non-citizen	Female	INDONESIA	Single/Sporadic	Lab confirmed Positive	Passive	ELISA	7
177	2011_177	2011	38	BATU 4 PANCHANG BEDENA, 45300 SUNGAI BESAR		3.70145	100.955	3.7014475, 100.9545214	Alive	Malay	Citizen	Male	MALAYSIA	Single/Sporadic	Lab confirmed Positive	Passive	PCR	7
196	2011_196	2011	53	k132 batu 7 Kampung Sungai Tengar SABAK BERNAM		3.82432	100.877	3.824323, 100.8771059	Alive	Malay	Citizen	Female	MALAYSIA	Single/Sporadic	Lab confirmed Positive	Passive	PCR	7
44	2011_44	2011	34	lot 6419 , Jln Rantau Panjang, Kampung Sg Udang, 42200 Klang, Selangor		3.06247	101.41	3.062466, 101.4099027	Alive	Malay	Citizen	Female	MALAYSIA	Single/Sporadic	Lab confirmed Positive	Passive	MAT	7
80	2011_80	2011	26	MAAHAD HAFIZ KLANG, WISMA HAFIZ JALAN BATU TIGA		3.04647	101.449	3.0464737, 101.4493266	Alive	Foreigners	Non-citizen	Male	INDONESIA	Cluster/Outbreak	Lab confirmed Positive	Passive	ELISA	7
163	2011_163	2011	17	NO 308 BLOK 9 TKT 2 JLN CANGKUL 19/3 SEK 19 SHAH ALAM		3.04929	101.526	3.0492857, 101.5258268	Alive	Malay	Citizen	Male	MALAYSIA	Single/Sporadic	Lab confirmed Positive	Passive	SEROLOGY	7
275	2011_275	2011	33	D2-23A,APARTMENT TERATAI,TMN BUNGA RAYA,BKT BERUNTUNG,RAWANG		3.44489	101.552	3.4448856, 101.5518525	Alive	Malay	Citizen	Female	MALAYSIA	Single/Sporadic	Lab confirmed Positive	Passive	SEROLOGY	7
45	2011_45	2011	40	24-4-9, PDK KONDO, JALAN PERSIARAN, BANDAR BARU KLANG		2.97637	101.772	2.976373, 101.771514	Alive	Malay	Citizen	Female	MALAYSIA	Single/Sporadic	Lab confirmed Positive	Passive	ELISA	7
47	2011_47	2011	40	NO 21 LORONG BENDAHARA 55C TAMAN SEJATI OFF JALAN RAJA NONG 41000 KLANG SELANGOR DARUL EHSAN		3.01704	101.469	3.0170399, 101.4688718	Alive	Indian	Citizen	Female	MALAYSIA	Single/Sporadic	Lab confirmed Positive	Passive	ELISA	7
245	2011_245	2011	53	6/3F FLAT TAMAN MULIA JAYA TAMAN MULIA JAYA AMPANG JAYA SELANGOR		3.13308	101.788	3.1330841, 101.7881234	Alive	Indian	Citizen	Male	MALAYSIA	Single/Sporadic	Lab confirmed Positive	Passive	SEROLOGY	7
291	2011_291	2011	53	25F JLN 1, TAMAN SERI, BATANG KALI		3.46185	101.651	3.4618491, 101.650808	Alive	Malay	Citizen	Male	MALAYSIA	Single/Sporadic	Lab confirmed Positive	Passive	MAT	7
26	2011_26	2011	36	LOT 2652-10 JLN KG KERDAS 5,BATU 6 GOMBAK		3.20332	101.675	3.2033225, 101.6751974	Alive	Malay	Citizen	Female	MALAYSIA	Single/Sporadic	Lab confirmed Positive	Passive	SEROLOGY	8
298	2011_298	2011	29	15 JLN WIDURI 2/FA, TAMAN WIDURI, BKT BERUNTUNG		3.43315	101.592	3.4331476, 101.5917773	Alive	Indian	Citizen	Male	MALAYSIA	Single/Sporadic	Lab confirmed Positive	Passive	SEROLOGY	8
132	2011_132	2011	47	NO.34,JLN 3,TMN DESA CHANGGANG JAYA,BKT CHANGGANG,BANTING		2.82983	101.605	2.8298303, 101.605177	Deceased	Malay	Citizen	Female	MALAYSIA	Single/Sporadic	Lab confirmed Positive	Passive	ELISA	8
213	2011_213	2011		11 B JLN PANDAN INDAH 4/6 PANDAN INDAH		3.13052	101.754	3.1305237, 101.7544863	Alive	Foreigners	Non-citizen	Male	MYANMAR	Single/Sporadic	Lab confirmed Positive	Passive	SEROLOGY	8
17	2011_17	2011	27	NO 148 KG BUNGA RAYA, KUANG, RAWANG		3.26455	101.558	3.264547, 101.5581999	Alive	Indian	Citizen	Male	MALAYSIA	Single/Sporadic	Lab confirmed Positive	Passive	SEROLOGY	8
171	2011_171	2011	26	LOT 170 ZON TERATAI, KG PAYA JARAS HILIR		3.20174	101.547	3.201735, 101.5473128	Alive	Malay	Citizen	Male	MALAYSIA	Single/Sporadic	Lab confirmed Positive	Passive	PCR	8
141	2011_141	2011		AL 42, JLN KG BARU, SG BULOH( BANGLA PASAR)		3.18412	101.554	3.1841169, 101.5536618	Alive	Foreigners	Non-citizen	Male	BANGLADESH	Single/Sporadic	Lab confirmed Positive	Passive	SEROLOGY	8
265	2011_265	2011		NO 129 KAMPUNG BARU CINA,68000 AMPANG.		3.16648	101.748	3.16648, 101.7483451	Alive	Foreigners	Non-citizen	Male	MYANMAR	Single/Sporadic	Lab confirmed Positive	Passive	SEROLOGY	8
278	2011_278	2011	27	A1, KAMPUNG GESIR ULU SG. SELISIK, KUALA KUBU BHARU, SELANGOR		3.73056	101.439	3.730562, 101.4387649	Alive	Malay	Citizen	Male	MALAYSIA	Single/Sporadic	Lab confirmed Positive	Passive	SEROLOGY	9
107	2011_107	2011	25	LOT 2426 BATU SATU JALAN BUNGA RAYA SIJANGKANG TELOK 42500 PANGLIMA GARANG SELANGOR DARUL EHSAN		2.93768	101.457	2.9376802, 101.4566219	Alive	Malay	Citizen	Male	MALAYSIA	Single/Sporadic	Lab confirmed Positive	Passive	SEROLOGY	9
224	2011_224	2011	24	LOT 7,JLN KAWASAN MIEL,SEKS 10 BB.BANGI		2.96191	101.757	2.961915, 101.757051	Alive	Foreigners	Non-citizen	Male	VIETNAM	Single/Sporadic	Lab confirmed Positive	Passive	SEROLOGY	9
281	2011_281	2011		LDG SG. TENGI SELATAN BESTARI JAYA, KUALA SELANGOR		3.37795	101.406	3.377953, 101.4062371	Alive	Foreigners	Non-citizen	Male	BANGLADESH	Single/Sporadic	Lab confirmed Positive	Passive	SEROLOGY	9
166	2011_166	2011		LOT 625A 23, JLN P'SIARAN MERANTI, SEK PJU 9, MUKIM BDR SRI DAMANSARA		3.19015	101.603	3.1901485, 101.6026943	Alive	Foreigners	Non-citizen	Male	INDONESIA	Single/Sporadic	Lab confirmed Positive	Passive	ELISA	9
204	2011_204	2011	70	TANAH KUBUR PARIT BARU BAROH		3.82776	100.851	3.827761, 100.8512921	Alive	Malay	Citizen	Male	MALAYSIA	Single/Sporadic	Lab confirmed Positive	Passive	PCR	9
232	2011_232	2011	3	NO 24,JLN SURADA 6,DESA SURADA SG RAMAL DALAM		2.97043	101.769	2.9704274, 101.7686507	Alive	Malay	Citizen	Male	MALAYSIA	Cluster/Outbreak	Lab confirmed Positive	Passive	SEROLOGY	9
207	2011_207	2011	25	NO29 PARIT 9 TIMUR		3.71821	101.039	3.7182081, 101.0392829	Alive	Malay	Citizen	Female	MALAYSIA	Single/Sporadic	Lab confirmed Positive	Passive	PCR	9
43	2011_43	2011	55	JALAN BAHAGIA PAYA BARAT KAMPUNG BUKIT KAPAR 42200 KLANG SELANGOR DARUL EHSAN		3.16784	101.415	3.1678412, 101.4152223	Alive	Malay	Citizen	Male	MALAYSIA	Single/Sporadic	Lab confirmed Positive	Passive	ELISA	9
78	2011_78	2011	23	YI SHIN ENGINEERING_x000D_ NO.10A,LOT 726,BATU 2 1/2,JLN SUNGAI RASAH,KLANG		3.05833	101.488	3.058332, 101.4881235	Alive	Foreigners	Non-citizen	Male	NEPAL	Single/Sporadic	Lab confirmed Positive	Passive	SEROLOGY	9
42	2011_42	2011	16	NO 4A-1A PANGSAPURI MARU EHSAN PERSIARAN HAMZAH ALAM 41200 KLANG SELANGOR DARUL EHSAN		2.96701	101.491	2.967008, 101.490712	Alive	Malay	Citizen	Male	MALAYSIA	Single/Sporadic	Lab confirmed Positive	Passive	ELISA	9
151	2011_151	2011		BLOK A 10-7 PANGSAPURI INDAH , JLN KINRARA 6F, BANDAR KINRARA 47100 PUCHONG		3.036	101.673	3.0360002, 101.6727339	Alive	Malay	Citizen	Male	MALAYSIA	Single/Sporadic	Lab confirmed Positive	Passive	SEROLOGY	9
181	2011_181	2011	68	PEKAN SELASA LAMA SUNGAI HAJI DORANI 45300 SUNGAI BESAR		3.63897	101.029	3.638966, 101.0289899	Alive	Malay	Citizen	Male	MALAYSIA	Single/Sporadic	Lab confirmed Positive	Passive	PCR	9
280	2011_280	2011	64	LOT 1195 KG SG CHOH, RAWANG		3.34352	101.587	3.343516, 101.5873729	Alive	Malay	Citizen	Male	MALAYSIA	Single/Sporadic	Lab confirmed Positive	Passive	MAT	9
286	2011_286	2011	28	NO. 6, KG. DESA KASIH, KALUMPANG		3.63871	101.573	3.638709, 101.5729639	Alive	Malay	Citizen	Female	MALAYSIA	Single/Sporadic	Lab confirmed Positive	Passive	PCR	9
285	2011_285	2011		KUARTERS IPD HULU SELANGOR KUALA KUBU BHARU		3.56358	101.661	3.5635842, 101.6609477	Alive	Malay	Citizen	Male	MALAYSIA	Single/Sporadic	Lab confirmed Positive	Passive	MAT	9
41	2011_41	2011	73	LOT 6810 KG BARU 2 BT 7 JLN KEBUN KLANG		2.97279	101.524	2.972785, 101.5242732	Alive	Malay	Citizen	Male	MALAYSIA	Single/Sporadic	Lab confirmed Positive	Passive	SEROLOGY	10
290	2011_290	2011	32	2 JLN MAHAGONI 2B/B, TAMU HILL PARK, BATANG KALI		3.4607	101.662	3.4606964, 101.6616937	Alive	Indian	Citizen	Male	MALAYSIA	Single/Sporadic	Lab confirmed Positive	Passive	PCR	10
301	2011_301	2011	51	NO. 21, JALAN GAPI 1E/5, ANTARA GAPI SERENDAH		3.43169	101.639	3.4316851, 101.6387864	Alive	Malay	Citizen	Male	MALAYSIA	Single/Sporadic	Lab confirmed Positive	Passive	PCR	10
48	2011_48	2011	39	LOT 2460 TLK KAPAS RANTAU PANJANG KLANG		3.05677	101.408	3.056769, 101.4080665	Alive	Malay	Citizen	Male	MALAYSIA	Single/Sporadic	Lab confirmed Positive	Passive	SEROLOGY	10
130	2011_130	2011	15	NO.16,JLN RAMBAI 5,TMN RAMBAI INDAH,JENJAROM		2.88431	101.494	2.8843054, 101.4941975	Alive	Indian	Citizen	Male	MALAYSIA	Single/Sporadic	Lab confirmed Positive	Passive	ELISA	10
10	2011_10	2011	20	BK 13-2-9,TMN SELAYANG SEJATI 2C,SELAYANG BARU		3.25306	101.671	3.253057, 101.670897	Alive	Malay	Citizen	Male	MALAYSIA	Single/Sporadic	Lab confirmed Positive	Passive	SEROLOGY	10
40	2011_40	2011	27	97 JLN SERI KENANGAN 4 JLN MERU KLANG		3.13267	101.444	3.1326705, 101.4435549	Alive	Indian	Citizen	Female	MALAYSIA	Single/Sporadic	Lab confirmed Positive	Passive	SEROLOGY	10
201	2011_201	2011		PARIT 12, SG NIBONG, PASIR PANJANG		3.59689	101.067	3.5968937, 101.0669514	Alive	Malay	Citizen	Female	MALAYSIA	Single/Sporadic	Lab confirmed Positive	Passive	ELISA	10
279	2011_279	2011	20	ASRAMA KOLEJ HARUN AMINURRASHID, TAMAN BERNAM		3.72306	101.521	3.723062, 101.521108	Alive	Malay	Citizen	Male	MALAYSIA	Single/Sporadic	Lab confirmed Positive	Passive	SEROLOGY	10
39	2011_39	2011	31	NO 24 BLOK J PANGSAPURI KELOMPOK CAMAR LRG SULTAN ABD SAMAD 4D PEL KLANG		3.03093	101.388	3.0309337, 101.3876067	Alive	Pribumi Sabah	Citizen	Male	MALAYSIA	Single/Sporadic	Lab confirmed Positive	Passive	SEROLOGY	10
149	2011_149	2011	23	NO.13,JLN KRISTAL L7/L,SEK.7,SHAH ALAM		3.07557	101.486	3.0755693, 101.4855468	Alive	Malay	Citizen	Female	MALAYSIA	Single/Sporadic	Lab confirmed Positive	Passive	SEROLOGY	10
189	2011_189	2011	52	NO 23 DESA EHSAN PARIT 8 GAMBUT SG PANJANG 45300 SG BESAR SELANGOR		3.61393	101.053	3.613925, 101.0527531	Alive	Malay	Citizen	Male	MALAYSIA	Single/Sporadic	Lab confirmed Positive	Passive	PCR	10
282	2011_282	2011	41	NO 30, JALAN BERLIAN 3D, TAMAN LEMBAH DAMAI KERLING		3.60142	101.612	3.601424, 101.6121596	Alive	Indian	Citizen	Male	MALAYSIA	Single/Sporadic	Lab confirmed Positive	Passive	MAT	10
127	2011_127	2011	86	KG ORANG ASLI, SG BUMBUN PULAU CAREY, TANJUNG 12,		2.85002	101.398	2.8500186, 101.3981164	Deceased	Aborigins	Citizen	Male	MALAYSIA	Single/Sporadic	Lab confirmed Positive	Passive	ELISA	10
257	2011_257	2011	54	G3 BLOK ANGGERIK JLN DAGANG 5/1, TAMAN DAGANG 68000 AMPANG SELANGOR		3.13612	101.776	3.1361192, 101.7762694	Alive	Malay	Citizen	Male	MALAYSIA	Single/Sporadic	Lab confirmed Positive	Passive	SEROLOGY	10
238	2011_238	2011		NO.62,PRIMA 7,CHERAS		3.10684	101.726	3.1068447, 101.7259197	Alive	Foreigners	Non-citizen	Male	INDIA	Single/Sporadic	Lab confirmed Positive	Passive	SEROLOGY	10
287	2011_287	2011		NO. 102, KG. BARU SEJANTUNG, KALUMPANG		3.63492	101.571	3.6349172, 101.571012	Alive	Foreigners	Non-citizen	Female	INDIA	Single/Sporadic	Lab confirmed Positive	Passive	MAT	10
254	2011_254	2011	60	NO 9 JLN 5/3 TMN SRI RAYA TASIK TAMBAHAN AMPANG		3.12237	101.768	3.1223727, 101.7680833	Alive	Malay	Citizen	Female	MALAYSIA	Single/Sporadic	Lab confirmed Positive	Passive	SEROLOGY	10
299	2011_299	2011	47	NO. 18, JALAN KIAMBANG 1A/5, DESA KIAMBANG SERENDAH		3.36394	101.597	3.36394, 101.5967004	Alive	Chinese	Citizen	Male	MALAYSIA	Single/Sporadic	Lab confirmed Positive	Passive	MAT	10
294	2011_294	2011	16	NO. 75, JALAN MERANTI 6A/3, BANDAR BARU,BATANG KALI		3.45555	101.655	3.4555519, 101.6545168	Alive	Malay	Citizen	Male	MALAYSIA	Single/Sporadic	Lab confirmed Positive	Passive	MAT	10
186	2011_186	2011	50	NO. 28, JALAN TPJ, TAMAN PERDANA, SG BESAR		3.66446	100.988	3.66446, 100.9882411	Alive	Indian	Citizen	Female	MALAYSIA	Single/Sporadic	Lab confirmed Positive	Passive	PCR	10
270	2011_270	2011	44	F-102, ASCADIA LAKE VIEW APRT, JALAN PERDANA 5/1, PANDAN PERDANA, KL		3.11593	101.744	3.1159311, 101.7441833	Alive	Chinese	Citizen	Male	MALAYSIA	Single/Sporadic	Lab confirmed Positive	Passive	SEROLOGY	10
272	2011_272	2011	49	NO 12,JLN 12 TMN SEMENYIH INDAH		2.94958	101.842	2.9495793, 101.842444	Alive	Malay	Citizen	Male	MALAYSIA	Single/Sporadic	Lab confirmed Positive	Passive	SEROLOGY	10
289	2011_289	2011		ASRAMA PEKERJA, FELDA TECHNO PLANT SG. TENGI SELATAN, KUALA KUBU BHARU		3.64757	101.417	3.647573, 101.4166199	Alive	Foreigners	Non-citizen	Male	INDONESIA	Single/Sporadic	Lab confirmed Positive	Passive	SEROLOGY	10
123	2011_123	2011	47	LOT 1871, JALAN TUMBOK PANTAI, TANJUNG SEPAT, SELANGOR.		2.68368	101.518	2.6836846, 101.5181466	Alive	Foreigners	Non-citizen	Male	INDONESIA	Single/Sporadic	Lab confirmed Positive	Passive	ELISA	10
227	2011_227	2011	22	C-05-17 JALAN 6/3 APPT SERI CEMPAKA KAJANG		3.0177	101.715	3.0177048, 101.7145045	Alive	Malay	Citizen	Male	MALAYSIA	Single/Sporadic	Lab confirmed Positive	Passive	SEROLOGY	10
142	2011_142	2011	43	15 BLOK A TKT 18 PPR HICOM JLN BKT BELIMBING SEK 26 SHAH ALAM		3.03633	101.544	3.0363326, 101.544069	Alive	Indian	Citizen	Male	MALAYSIA	Single/Sporadic	Lab confirmed Positive	Passive	SEROLOGY	11
147	2011_147	2011	20	Y3/14A,BLOK H,JLN PLUMBUM Y7/Y,PUSAR KOMERSIAL SEK.7,SHAH ALAM		3.06498	101.49	3.064978, 101.4902394	Alive	Malay	Citizen	Male	MALAYSIA	Single/Sporadic	Lab confirmed Positive	Passive	SEROLOGY	11
195	2011_195	2011	41	NO 4,JLN ANGKASA KG TEBUK PULAI		3.71612	100.99	3.7161206, 100.9902097	Alive	Malay	Citizen	Female	MALAYSIA	Single/Sporadic	Lab confirmed Positive	Passive	ELISA	11
209	2011_209	2011	17	HOSTEL CENDIKIAWAN, UNITEN BANGI		2.97749	101.731	2.9774901, 101.7307035	Alive	Indian	Citizen	Male	MALAYSIA	Single/Sporadic	Lab confirmed Positive	Passive	SEROLOGY	11
231	2011_231	2011		NO. 8, BATU 12, SG. SEKAMAT KAJANG		3.02272	101.776	3.022724, 101.7762604	Deceased	Foreigners	Non-citizen	Male	BANGLADESH	Single/Sporadic	Lab confirmed Positive	Passive	Rapid Test	11
38	2011_38	2011	64	NO 10 SOLOK BATU UNJUR 3-A TMN BAYU PERDANA		3.01817	101.437	3.0181687, 101.4373725	Alive	Indian	Citizen	Male	MALAYSIA	Single/Sporadic	Lab confirmed Positive	Passive	SEROLOGY	11
148	2011_148	2011	23	NO.19,JLN NAPUH 20/10,SEK.20,SHAH ALAM		3.05465	101.539	3.0546467, 101.5391395	Alive	Indian	Citizen	Female	MALAYSIA	Single/Sporadic	Lab confirmed Positive	Passive	ELISA	11
103	2011_103	2011	34	NO.17,JLN HAPARAN 25/29,TMN SRI MUDA,SHAH ALAM		3.03529	101.533	3.0352868, 101.5327909	Alive	Indian	Citizen	Male	MALAYSIA	Single/Sporadic	Lab confirmed Positive	Passive	SEROLOGY	11
262	2011_262	2011		IOI 3A FLAT PANDAN PERDANA 55300 KL		3.12482	101.746	3.1248193, 101.7459695	Alive	Malay	Citizen	Male	MALAYSIA	Single/Sporadic	Lab confirmed Positive	Passive	SEROLOGY	11
255	2011_255	2011	18	NO 18, JLN TMN SRI RAYA KG TASIK TAMBAHAN, 68000 AMPANG SELANGOR.		3.12888	101.776	3.128881, 101.775623	Alive	Malay	Citizen	Male	MALAYSIA	Single/Sporadic	Lab confirmed Positive	Passive	SEROLOGY	11
271	2011_271	2011		1927 JLN PERMAI E LORONG PERMAI , 29 KG TASEK PERMAI 68000 AMPANG SELANGOR.		3.12462	101.777	3.1246151, 101.7769401	Alive	Foreigners	Non-citizen	Male	BANGLADESH	Single/Sporadic	Lab confirmed Positive	Passive	SEROLOGY	11
283	2011_283	2011	26	No. 242, Kampung Baru, Selangor, 44100 Kerling		3.60827	101.548	3.608267, 101.5475409	Alive	Foreigners	Non-citizen	Male	MYANMAR	Single/Sporadic	Lab confirmed Positive	Passive	PCR	11
37	2011_37	2011		NO 73 SOLOK SULTAN MUHAMED 1 BDR SULTAN SULAIMAN PEL KLANG		3.03099	101.382	3.0309948, 101.3821337	Alive	Foreigners	Non-citizen	Male	INDIA	Single/Sporadic	Lab confirmed Positive	Passive	SEROLOGY	11
124	2011_124	2011	72	NO 8 JLN TIOMAN 15, TMN. SRI PUTRA		3.2047	101.713	3.2047, 101.71314	Alive	Indian	Citizen	Male	MALAYSIA	Single/Sporadic	Lab confirmed Positive	Passive	PCR	11
36	2011_36	2011		NO 11 TKT 3 BLOK A TMN CHI LIUNG		3.024	101.432	3.024001, 101.4321989	Alive	Foreigners	Non-citizen	Male	INDONESIA	Single/Sporadic	Lab confirmed Positive	Passive	SEROLOGY	11
170	2011_170	2011	11	LOT 3391, KG MELAYU ,SUBANG, 40000 SHAH ALAM ,SELANGOR		3.07978	101.508	3.0797788, 101.5077573	Alive	Malay	Citizen	Female	MALAYSIA	Single/Sporadic	Lab confirmed Positive	Passive	SEROLOGY	11
225	2011_225	2011	33	JABATAN PATOLOGI HOSPITAL KAJANG		2.99288	101.793	2.992875, 101.7928458	Alive	Malay	Citizen	Female	MALAYSIA	Single/Sporadic	Lab confirmed Positive	Passive	SEROLOGY	11
230	2011_230	2011	26	TAMAN SRI KENARI, SG CHUA KAJANG		2.99011	101.77	2.9901091, 101.7695338	Alive	Malay	Citizen	Male	MALAYSIA	Single/Sporadic	Lab confirmed Positive	Passive	SEROLOGY	11
233	2011_233	2011	27	JABATAN PATOLOGI HOSPITAL KAJANG		2.99288	101.793	2.992875, 101.7928458	Alive	Malay	Citizen	Female	MALAYSIA	Single/Sporadic	Lab confirmed Positive	Passive	SEROLOGY	11
239	2011_239	2011	24	Taman Sri Indah, 43200 Cheras, Selangor		3.03106	101.767	3.03106, 101.7673279	Alive	Indian	Citizen	Male	MALAYSIA	Single/Sporadic	Lab confirmed Positive	Passive	Rapid Test	11
221	2011_221	2011	7	NO 12A KG JAWA BATU 18 HULU LANGAT, SELANGOR.		3.16706	101.853	3.1670647, 101.852668	Alive	Malay	Citizen	Female	MALAYSIA	Single/Sporadic	Lab confirmed Positive	Passive	SEROLOGY	11
229	2011_229	2011	20	NO 51, Jalan Sakap 4, Taman Sakap, 43000 Kajang, Selangor		2.99017	101.814	2.9901685, 101.8138299	Alive	Chinese	Citizen	Male	MALAYSIA	Single/Sporadic	Lab confirmed Positive	Passive	Rapid Test	11
88	2011_88	2011	38	NO.50,LORONG BATU NILAM 33A,BDR BKT TINGGI,KLANG		2.99677	101.432	2.9967742, 101.4318101	Alive	Chinese	Citizen	Male	MALAYSIA	Single/Sporadic	Lab confirmed Positive	Passive	SEROLOGY	11
300	2011_300	2011	61	BLOK SBG-G-01 SRI BAKAWALI,BKT SENTOSA3, SEKSYEN B.S. 10, RAWANG		3.40753	101.598	3.407532, 101.5981859	Alive	Malay	Citizen	Male	MALAYSIA	Single/Sporadic	Lab confirmed Positive	Passive	SEROLOGY	11
108	2011_108	2011	23	KEM TUDM JUGRA		2.82535	101.453	2.8253506, 101.4525263	Alive	Malay	Citizen	Male	MALAYSIA	Cluster/Outbreak	Lab confirmed Positive	Passive	SEROLOGY	11
109	2011_109	2011	19	KEM TUDM JUGRA		2.82535	101.453	2.8253506, 101.4525263	Alive	Malay	Citizen	Male	MALAYSIA	Cluster/Outbreak	Lab confirmed Positive	Passive	SEROLOGY	11
110	2011_110	2011	20	KEM TUDM JUGRA		2.82535	101.453	2.8253506, 101.4525263	Alive	Malay	Citizen	Male	MALAYSIA	Cluster/Outbreak	Lab confirmed Positive	Passive	SEROLOGY	11
111	2011_111	2011	21	KEM TUDM JUGRA		2.82535	101.453	2.8253506, 101.4525263	Alive	Malay	Citizen	Male	MALAYSIA	Cluster/Outbreak	Lab confirmed Positive	Passive	SEROLOGY	11
112	2011_112	2011	19	KEM TUDM JUGRA		2.82535	101.453	2.8253506, 101.4525263	Alive	Malay	Citizen	Male	MALAYSIA	Cluster/Outbreak	Lab confirmed Positive	Passive	SEROLOGY	11
113	2011_113	2011	28	KEM TUDM JUGRA		2.82535	101.453	2.8253506, 101.4525263	Alive	Malay	Citizen	Male	MALAYSIA	Cluster/Outbreak	Lab confirmed Positive	Passive	SEROLOGY	11
114	2011_114	2011	20	KEM TUDM JUGRA		2.82535	101.453	2.8253506, 101.4525263	Alive	Malay	Citizen	Male	MALAYSIA	Cluster/Outbreak	Lab confirmed Positive	Passive	SEROLOGY	11
115	2011_115	2011	23	KEM TUDM JUGRA		2.82535	101.453	2.8253506, 101.4525263	Alive	Malay	Citizen	Male	MALAYSIA	Cluster/Outbreak	Lab confirmed Positive	Passive	SEROLOGY	11
116	2011_116	2011	22	KEM TUDM JUGRA		2.82535	101.453	2.8253506, 101.4525263	Alive	Malay	Citizen	Male	MALAYSIA	Cluster/Outbreak	Lab confirmed Positive	Passive	SEROLOGY	11
117	2011_117	2011	21	KEM TUDM JUGRA		2.82535	101.453	2.8253506, 101.4525263	Alive	Malay	Citizen	Male	MALAYSIA	Cluster/Outbreak	Lab confirmed Positive	Passive	SEROLOGY	11
118	2011_118	2011	23	KEM TUDM JUGRA		2.82535	101.453	2.8253506, 101.4525263	Alive	Malay	Citizen	Male	MALAYSIA	Cluster/Outbreak	Lab confirmed Positive	Passive	SEROLOGY	11
119	2011_119	2011	20	KEM TUDM JUGRA		2.82535	101.453	2.8253506, 101.4525263	Alive	Malay	Citizen	Male	MALAYSIA	Cluster/Outbreak	Lab confirmed Positive	Passive	SEROLOGY	11
120	2011_120	2011	23	KEM TUDM JUGRA		2.82535	101.453	2.8253506, 101.4525263	Alive	Malay	Citizen	Male	MALAYSIA	Cluster/Outbreak	Lab confirmed Positive	Passive	SEROLOGY	11
121	2011_121	2011	19	KEM TUDM JUGRA		2.82535	101.453	2.8253506, 101.4525263	Alive	Malay	Citizen	Male	MALAYSIA	Cluster/Outbreak	Lab confirmed Positive	Passive	MAT	11
126	2011_126	2011		KEM TUDM JUGRA,BANTING		2.82535	101.453	2.8253506, 101.4525263	Deceased	Malay	Citizen	Male	MALAYSIA	Cluster/Outbreak	Lab confirmed Positive	Passive	MAT	11
236	2011_236	2011	23	LOT 302,BATU 12 1/2 JLN CHERAS		3.01236	101.779	3.012364, 101.7785796	Alive	Malay	Citizen	Male	MALAYSIA	Single/Sporadic	Lab confirmed Positive	Passive	Rapid Test	11
244	2011_244	2011	64	NO.01-02 TAMAN MESRA RIA,AMPANG CAMPURAN,AMPANG		3.13224	101.773	3.1322435, 101.7729753	Alive	Malay	Citizen	Male	MALAYSIA	Single/Sporadic	Lab confirmed Positive	Passive	SEROLOGY	11
122	2011_122	2011		TUDM JUGRA, BANTING		2.82535	101.453	2.8253506, 101.4525263	Alive	Pribumi Sarawak	Citizen	Male	MALAYSIA	Cluster/Outbreak	Lab confirmed Positive	Passive	SEROLOGY	12
235	2011_235	2011	14	NO 15-5-D KAJANG PERDANA 2 TMN KAJANG PERDANA		2.98908	101.821	2.9890773, 101.8206787	Alive	Malay	Citizen	Female	MALAYSIA	Single/Sporadic	Lab confirmed Positive	Passive	Rapid Test	12
242	2011_242	2011	26	A2-4-16 PANGSAPURI GHAZAL AZ, BALAKONG		3.02568	101.738	3.0256822, 101.738147	Alive	Indian	Citizen	Female	MALAYSIA	Single/Sporadic	Lab confirmed Positive	Passive	Rapid Test	12
212	2011_212	2011	52	NO 3, JLN 5/23 ,AMPANG TASEK TAMBAHAN		3.12686	101.77	3.126858, 101.769834	Alive	Indian	Citizen	Male	MALAYSIA	Single/Sporadic	Lab confirmed Positive	Passive	SEROLOGY	12
179	2011_179	2011	17	LOT 26, BATU 41/2 KG. PANCANG BEDENA 45300 SG.BESAR		3.68728	100.971	3.687275, 100.971339	Alive	Malay	Citizen	Female	MALAYSIA	Single/Sporadic	Lab confirmed Positive	Passive	PCR	12
210	2011_210	2011	52	NO 17 JLN KEDIDI 12 TAMAN SEPANG PUTRA, SG PELEK		2.6164	101.694	2.6163979, 101.6942656	Alive	Indian	Citizen	Male	MALAYSIA	Single/Sporadic	Lab confirmed Positive	Passive	SEROLOGY	12
79	2011_79	2011	31	NO 57 JALAN SUNGAI KERAMAT 36,KLANG UTAMA		3.08729	101.423	3.0872861, 101.4226858	Alive	Malay	Citizen	Female	MALAYSIA	Single/Sporadic	Lab confirmed Positive	Passive	ELISA	12
100	2011_100	2011	19	BLOK B TKT 3 SEGI CENTRAL TRAINING PULAU INDAH		2.94904	101.332	2.9490389, 101.3317605	Alive	Malay	Citizen	Male	MALAYSIA	Single/Sporadic	Lab confirmed Positive	Passive	SEROLOGY	12
129	2011_129	2011	44	NO.5,JLN PERKASA 10,TMN PERKASA,TELOK PANGLIMA GARANG		2.90969	101.468	2.909686, 101.468448	Deceased	Indian	Citizen	Male	MALAYSIA	Single/Sporadic	Lab confirmed Positive	Passive	ELISA	12
96	2011_96	2011	31	NO.130 JLN BATU UNJUR 1, TMN BAYU PERDANA,		3.01497	101.435	3.0149663, 101.4346463	Alive	Pribumi Sabah	Citizen	Male	MALAYSIA	Single/Sporadic	Lab confirmed Positive	Passive	SEROLOGY	12
99	2011_99	2011	25	NO.14,JLN DATO YUSOF SHAHBUDIN 27,TMN SENTOSA,KLANG		3.01064	101.465	3.0106387, 101.4654614	Alive	Indian	Citizen	Male	MALAYSIA	Single/Sporadic	Lab confirmed Positive	Passive	SEROLOGY	12
35	2011_35	2011	24	8 SOLOK 3C JLN SRI SARAWAK 35A TMN SRI ANDALAS		3.01326	101.447	3.0132621, 101.4466902	Alive	Malay	Citizen	Male	MALAYSIA	Single/Sporadic	Lab confirmed Positive	Passive	SEROLOGY	12
145	2011_145	2011		1C BLOK 8 FLAT PKNS SEK 16 SHAH ALAM		3.05719	101.502	3.05719, 101.5017559	Alive	Foreigners	Non-citizen	Male	BANGLADESH	Single/Sporadic	Lab confirmed Positive	Passive	SEROLOGY	12
34	2011_34	2011	31	NO 7 FASA 18 JLN DATO YUSOF SHAHBUDIN 40 TMN SENTOSA		3.01064	101.465	3.0106387, 101.4654614	Alive	Indian	Citizen	Male	MALAYSIA	Single/Sporadic	Lab confirmed Positive	Passive	SEROLOGY	12
161	2011_161	2011	39	NO 6 TKT 3 BLOK E 1963 PERSIARAN DAMAR SEK 11 SHAH ALAM		3.07411	101.529	3.07411, 101.52878	Alive	Malay	Citizen	Male	MALAYSIA	Single/Sporadic	Lab confirmed Positive	Passive	SEROLOGY	12
237	2011_237	2011	52	NO 59,JLN 7 TMN MAJU OFF JLN SEMENYIH		2.949	101.832	2.9490019, 101.8322098	Alive	Malay	Citizen	Male	MALAYSIA	Single/Sporadic	Lab confirmed Positive	Passive	Rapid Test	12
84	2011_84	2011		28,JLN MOHD TAHIR 1,TMN SENTOSA,KLANG		3.01305	101.464	3.0130474, 101.4639854	Alive	Indian	Citizen	Male	MALAYSIA	Single/Sporadic	Lab confirmed Positive	Passive	ELISA	12
98	2011_98	2011	21	NO.91,BLOK E2-5,PANDAMARAN JAYA,PELABUHAN KLANG		2.99886	101.424	2.9988619, 101.4243958	Alive	Indian	Citizen	Female	MALAYSIA	Single/Sporadic	Lab confirmed Positive	Passive	SEROLOGY	12
133	2011_133	2011	30	TAWEI (M) BT 14, JLN KAPAR, KLANG		3.07246	101.413	3.0724577, 101.4134507	Alive	Foreigners	Non-citizen	Male	NEPAL	Single/Sporadic	Lab confirmed Positive	Passive	SEROLOGY	12
206	2011_206	2011	25	NO.101 KG. DESA KASIH MERBAU BERDARAH, SG. PANJANG		3.71391	101.13	3.71391, 101.1295411	Alive	Malay	Citizen	Male	MALAYSIA	Single/Sporadic	Lab confirmed Positive	Passive	PCR	12
219	2011_219	2011	3	NO 28,JLN MUTIARA 4/2 TMN SRI NANDING		3.10069	101.807	3.1006871, 101.8067446	Alive	Malay	Citizen	Female	MALAYSIA	Single/Sporadic	Lab confirmed Positive	Passive	Rapid Test	12
187	2011_187	2011	61	95B JALAN ANGGERIK SG BESAR		3.67754	100.986	3.6775408, 100.9860711	Alive	Malay	Citizen	Female	MALAYSIA	Single/Sporadic	Lab confirmed Positive	Passive	PCR	12
273	2011_273	2011	27	NO 6,JLN DESA MEWAH 13,TMN DESA MEWAH		2.96199	101.844	2.9619858, 101.8440825	Alive	Malay	Citizen	Male	MALAYSIA	Single/Sporadic	Lab confirmed Positive	Passive	SEROLOGY	12
97	2011_97	2011	53	NO.19,JLN DATO DAGANG 2,TMN SENTOSA,KLANG		3.00262	101.463	3.0026156, 101.4632892	Alive	Indian	Citizen	Male	MALAYSIA	Single/Sporadic	Lab confirmed Positive	Passive	SEROLOGY	12
32	2011_32	2011	21	LOT 617 JLN KUNDANG KG PADANG JAWA		3.04806	101.489	3.0480553, 101.4888605	Alive	Malay	Citizen	Male	MALAYSIA	Single/Sporadic	Lab confirmed Positive	Passive	SEROLOGY	12
33	2011_33	2011	18	NO 11 JALAN DAMAR MERAH 6, Taman PENDAMAR INDAH 2, PELABUHAN KLANG		2.98254	101.427	2.9825418, 101.4266294	Alive	Indian	Citizen	Male	MALAYSIA	Single/Sporadic	Lab confirmed Positive	Passive	SEROLOGY	12
86	2011_86	2011	31	NO.40,JLN DAMAR 6,SRI PANDAMAR,KLANG		2.98078	101.432	2.9807788, 101.4316516	Alive	Indian	Citizen	Female	MALAYSIA	Single/Sporadic	Lab confirmed Positive	Passive	SEROLOGY	12
104	2011_104	2011	29	36,TMN SRI MUDA,SHAH ALAM		3.03173	101.535	3.03173, 101.534841	Alive	Pribumi Sabah	Citizen	Male	MALAYSIA	Single/Sporadic	Lab confirmed Positive	Passive	SEROLOGY	12
416	2012_115	2012	68	NO. 39, JALAN 5A, TAMAN DESA KELISA, ULU YAM BHARU		3.42005	101.659	3.4200495, 101.6588407	Alive	Malay	Citizen	Male	MALAYSIA	Single/Sporadic	Lab confirmed Positive	Passive	MAT	12
30	2011_30	2011	70	NO 24 LOT 1952 jalan sungai putus BaTu BELAH KG RANTAU PANJANG, selangor		3.06953	101.438	3.0695327, 101.4375974	Alive	Indian	Citizen	Male	MALAYSIA	Single/Sporadic	Lab confirmed Positive	Passive	SEROLOGY	12
85	2011_85	2011	27	113A,TMN KEM,PELABUHAN KLANG		2.99985	101.393	2.999852, 101.39283	Alive	Foreigners	Non-citizen	Male	BANGLADESH	Single/Sporadic	Lab confirmed Positive	Passive	SEROLOGY	12
31	2011_31	2011		LOT 10427 A JLN SG JATI KG JAWA		3.00408	101.486	3.0040766, 101.4860429	Alive	Foreigners	Non-citizen	Male	BANGLADESH	Single/Sporadic	Lab confirmed Positive	Passive	SEROLOGY	12
234	2011_234	2011	18	NO 3 JLN SEKS 2/11 TAMAN KAJANG UTAMA		2.9697	101.796	2.9696981, 101.7960706	Alive	Malay	Citizen	Male	MALAYSIA	Single/Sporadic	Lab confirmed Positive	Passive	Rapid Test	12
243	2011_243	2011	14	G8-9-7 KEM PGA CHERAS		3.08283	101.754	3.0828335, 101.7537097	Alive	Malay	Citizen	Female	MALAYSIA	Single/Sporadic	Lab confirmed Positive	Passive	Rapid Test	12
176	2011_176	2011	64	LOT 1002 Kampung Parit Sepuloh, 45300 Sungai Besar, Selangor		3.7165	101.057	3.716496, 101.0573842	Alive	Malay	Citizen	Female	MALAYSIA	Single/Sporadic	Lab confirmed Positive	Passive	PCR	12
197	2011_197	2011	11	NO. 130,JALAN MUTIARA, 45200 SABAK		3.76513	100.984	3.7651282, 100.9837637	Alive	Malay	Citizen	Female	MALAYSIA	Single/Sporadic	Lab confirmed Positive	Passive	PCR	12
223	2011_223	2011	75	57, Jalan Sakap, Taman Sakap, 43000 Kajang, Selangor		2.99058	101.814	2.9905762, 101.8140555	Alive	Malay	Citizen	Male	MALAYSIA	Single/Sporadic	Lab confirmed Positive	Passive	Rapid Test	12
337	2012_36	2012	39	NO 240 TG SEPAT LAUT TANJUNG SEPAT		2.66531	101.558	2.665308, 101.5576981	Alive	Chinese	Citizen	Male	MALAYSIA	Single/Sporadic	Lab confirmed Positive	Passive	SEROLOGY	12
218	2011_218	2011	40	NO 56,JLN KESUMA 1/17 BNDR TASEK KESUMA		2.91417	101.868	2.914174, 101.8679789	Alive	Malay	Citizen	Female	MALAYSIA	Single/Sporadic	Lab confirmed Positive	Passive	Rapid Test	12
384	2012_83	2012	77	NO 1A JALAN LAMA, SUNGAI LIMAU TEBOK HJ YUSOF, 45300 SG.BESAR		3.67308	100.984	3.6730772, 100.9840765	Alive	Indian	Citizen	Male	MALAYSIA	Single/Sporadic	Lab confirmed Positive	Passive	MAT	1
336	2012_35	2012	41	LOT 1346 BT 2 1/4 JLN SRI CHEEDING		2.88985	101.55	2.889848, 101.5504409	Alive	Chinese	Citizen	Male	MALAYSIA	Single/Sporadic	Lab confirmed Positive	Passive	ELISA	1
304	2012_3	2012	42	2A-1A JALAN 05 1/2 ONE SELAYANG BATU CAVES,68100,SELANGOR		3.24803	101.652	3.248028, 101.651621	Alive	Others	Citizen	Male	MALAYSIA	Single/Sporadic	Lab confirmed Positive	Passive	SEROLOGY	1
321	2012_20	2012	52	LOT 3547 NO 125 BT 9 JLN KAPAR		3.0512	101.448	3.0511959, 101.4476889	Alive	Indian	Citizen	Male	MALAYSIA	Single/Sporadic	Lab confirmed Positive	Passive	ELISA	1
436	2012_135	2012	10	NO. 6, JALAN MERANTI 5/1, SEKSYEN 3, BANDAR UTAMA, BATANG KALI.		3.45633	101.654	3.4563338, 101.6541093	Alive	Indian	Citizen	Male	MALAYSIA	Single/Sporadic	Lab confirmed Positive	Passive	PCR	1
328	2012_27	2012	92	NO.6,JLN BKT KUDA,KLANG		3.04723	101.451	3.0472321, 101.4509718	Alive	Indian	Citizen	Male	MALAYSIA	Single/Sporadic	Lab confirmed Positive	Passive	ELISA	1
352	2012_51	2012	25	GR 13, TANGGA 4, BLOK LILI ASTANA ALAM 3, BANDAR BARU PUNCAK ALAM, KUALA SELANGOR		3.22969	101.425	3.229688, 101.425235	Alive	Malay	Citizen	Male	MALAYSIA	Single/Sporadic	Lab confirmed Positive	Passive	PCR	1
399	2012_98	2012	17	JALAN SEKOLAH, SG. AIR TAWAR		3.78689	100.852	3.786892, 100.8523054	Alive	Malay	Citizen	Female	MALAYSIA	Single/Sporadic	Lab confirmed Positive	Passive	PCR	1
382	2012_81	2012	29	LOT 316 JLN LAMA PANCANG BEDENA SG BESAR		3.6582	100.996	3.6581979, 100.996364	Alive	Malay	Citizen	Male	MALAYSIA	Single/Sporadic	Lab confirmed Positive	Passive	PCR	1
420	2012_119	2012	10	LOT. 2804, JLN. KUBUR LAMA, ULU YAM BHARU		3.42496	101.66	3.424962, 101.659725	Alive	Malay	Citizen	Female	MALAYSIA	Single/Sporadic	Lab confirmed Positive	Passive	SEROLOGY	1
307	2012_6	2012	25	NO 24 13/2 JLN DESA , BDR COUNTRY HOMES, RAWANG, SELANGOR		3.33233	101.527	3.3323327, 101.5274055	Alive	Malay	Citizen	Female	MALAYSIA	Single/Sporadic	Lab confirmed Positive	Passive	SEROLOGY	1
333	2012_32	2012	31	NO.5,LORONG MOHD TAHIR 25E,JLN RAJA NONG,SJ.JATI,KLANG		3.02208	101.465	3.0220771, 101.4654331	Alive	Malay	Citizen	Female	MALAYSIA	Single/Sporadic	Lab confirmed Positive	Passive	SEROLOGY	1
443	2012_142	2012	32	B 3/1, PANGSAPURI HARMONI, PUSAT PERKEMBANGAN KEMAHIRAN SERENDAH.		3.36393	101.603	3.363928, 101.6028641	Alive	Malay	Citizen	Male	MALAYSIA	Single/Sporadic	Lab confirmed Positive	Passive	MAT	1
361	2012_60	2012	31	NO 73 JLN PJU 10/14J, SAUJANA D'SARA		3.19682	101.588	3.1968218, 101.5880068	Alive	Malay	Citizen	Male	MALAYSIA	Single/Sporadic	Lab confirmed Positive	Passive	PCR	1
335	2012_34	2012	25	BLOK B-2A,JLN TOKOH 25/28,TMN SRI MUDA,SHAH ALAM		3.03502	101.532	3.0350158, 101.5318185	Alive	Malay	Citizen	Male	MALAYSIA	Single/Sporadic	Lab confirmed Positive	Passive	SEROLOGY	1
409	2012_108	2012	2	B-08-07 MESRA PRIMA APARTMENT, JLN IKAN EMAS, AMPANG CAMPURAN, 68000 AMPANG		3.1319	101.773	3.1318967, 101.7729187	Alive	Malay	Citizen	Female	MALAYSIA	Single/Sporadic	Lab confirmed Positive	Passive	MAT	1
393	2012_92	2012	85	PT 628 LORONG 5 TAMAN SENTOSA SABAK BERNAM		3.50131	101.11	3.5013136, 101.1097407	Alive	Chinese	Citizen	Male	MALAYSIA	Single/Sporadic	Lab confirmed Positive	Passive	PCR	1
318	2012_17	2012	27	73 PT 9630 JLN SERULING 58 TMN KLANG JAYA		3.00616	101.453	3.0061587, 101.4532219	Alive	Foreigners	Non-citizen	Male	BANGLADESH	Single/Sporadic	Lab confirmed Positive	Passive	SEROLOGY	2
309	2012_8	2012	17	C 81 KG MELAYU SRI KUNDANG,KUANG 48050 RAWANG		3.26172	101.536	3.2617183, 101.5361726	Alive	Malay	Citizen	Male	MALAYSIA	Single/Sporadic	Lab confirmed Positive	Passive	SEROLOGY	2
351	2012_50	2012	42	NO.244, LRG AMAN, BKT NO.3, KG. JAYA SETIA, BESTARI JAYA		3.36079	101.417	3.360789, 101.4169568	Alive	Malay	Citizen	Male	MALAYSIA	Single/Sporadic	Lab confirmed Positive	Passive	PCR	2
325	2012_24	2012	33	A1-46 PRIMA BAYU PERDANA		3.01729	101.436	3.017291, 101.436206	Alive	Foreigners	Non-citizen	Female	MYANMAR	Single/Sporadic	Lab confirmed Positive	Passive	SEROLOGY	2
319	2012_18	2012	36	LOT 15030 BT 5 KG JOHAN SETIA, Jalan Klang-Banting, Klang, Selangor		2.96333	101.466	2.963332, 101.4658938	Alive	Malay	Citizen	Female	MALAYSIA	Single/Sporadic	Lab confirmed Positive	Passive	SEROLOGY	2
375	2012_74	2012	25	NO.4,TKT 4, BLOK 5, APARTMENT JASMIN, JLN PLUTO U5/138, 40150 SHAH ALAM		3.07328	101.518	3.073281, 101.518461	Alive	Malay	Citizen	Male	MALAYSIA	Single/Sporadic	Lab confirmed Positive	Passive	PCR	2
385	2012_84	2012	16	NO 40 JLN 7 TMN BERKAT SG BESAR		3.66886	100.989	3.6688632, 100.9891542	Alive	Malay	Citizen	Male	MALAYSIA	Single/Sporadic	Lab confirmed Positive	Passive	PCR	2
311	2012_10	2012	2	NO 4 JLN BKIT INDAH 2/8 TMN BUKIT INDAH, 68000 AMPANG SELANGOR		3.15119	101.776	3.1511862, 101.7759307	Alive	Malay	Citizen	Male	MALAYSIA	Single/Sporadic	Lab confirmed Positive	Passive	SEROLOGY	2
374	2012_73	2012	38	BLOK 54, TINGKAT 1-4-5, ARMT SRI ANGKASA, SEKSYEN 28, SHAH ALAM		3.00464	101.567	3.0046386, 101.5673963	Alive	Malay	Citizen	Female	MALAYSIA	Single/Sporadic	Lab confirmed Positive	Passive	PCR	2
387	2012_86	2012	10	PT 6931,LORONG SELUANG,TMN SETIA JAYA,SUNGAI BESAR		3.66694	100.994	3.666936, 100.993963	Deceased	Malay	Citizen	Male	MALAYSIA	Single/Sporadic	Lab confirmed Positive	Passive	SEROLOGY	2
395	2012_94	2012	21	NO 19 RUMAH MURAH, SPG 4 BNO, SABAK BERNAM, SELANGOR.		3.76924	100.892	3.769235, 100.891913	Alive	Malay	Citizen	Male	MALAYSIA	Single/Sporadic	Lab confirmed Positive	Passive	PCR	2
327	2012_26	2012	25	3-2A JLN HULUBALANG 37A TMN MILLENIUM SENTOSA		3.00112	101.475	3.0011164, 101.4752026	Alive	Indian	Citizen	Male	MALAYSIA	Single/Sporadic	Lab confirmed Positive	Passive	SEROLOGY	2
306	2012_5	2012	35	25 & 27 JLN BJ 6,TMN PERINDUSTRIAN BELMAS,JOHAN, RAWANG		3.3073	101.556	3.3072958, 101.555938	Alive	Foreigners	Non-citizen	Male	MYANMAR	Single/Sporadic	Lab confirmed Positive	Passive	SEROLOGY	2
316	2012_15	2012	16	MAAHAD INTEGRASI TAHFIZ SAINS DAN TEKNOLOGI KLANG		3.03057	101.46	3.0305686, 101.4604797	Alive	Malay	Citizen	Female	MALAYSIA	Cluster/Outbreak	Lab confirmed Positive	Active	MAT	2
330	2012_29	2012	15	MAAHAD INTEGRASI TAHFIZ SAINS DAN TEKNOLOGI		3.03057	101.46	3.0305686, 101.4604797	Alive	Malay	Citizen	Male	MALAYSIA	Cluster/Outbreak	Lab confirmed Positive	Active	MAT	2
359	2012_58	2012	16	8 TKT 7 BLOK C JLN PJS 2C/2 TMN MEDAN CAHAYA		3.07322	101.637	3.0732207, 101.6372498	Alive	Malay	Citizen	Male	MALAYSIA	Single/Sporadic	Lab confirmed Positive	Passive	SEROLOGY	2
312	2012_11	2012	18	NO.20 JLN AU 4/1 AMPANG HULU KELANG		3.1967	101.758	3.1966969, 101.7578805	Alive	Malay	Citizen	Female	MALAYSIA	Single/Sporadic	Lab confirmed Positive	Passive	SEROLOGY	2
413	2012_112	2012	40	NO23 BLOK M, RUMAH MURAH BATANG KALI		3.46014	101.655	3.4601368, 101.6550138	Alive	Indian	Citizen	Male	MALAYSIA	Single/Sporadic	Lab confirmed Positive	Passive	PCR	2
389	2012_88	2012	16	ASRAMA YAYASAN SELANGOR SABAK BERNAM		3.76992	100.987	3.7699169, 100.9872515	Alive	Malay	Citizen	Male	MALAYSIA	Single/Sporadic	Lab confirmed Positive	Passive	PCR	2
326	2012_25	2012	54	123 LENGKOK SRI SIANTAN 51 TMN SRI ANDALAS		3.01858	101.445	3.0185806, 101.4450061	Alive	Malay	Citizen	Female	MALAYSIA	Single/Sporadic	Lab confirmed Positive	Passive	SEROLOGY	2
378	2012_77	2012	12	NO JALAN TP 2B TAMAN PERDANA 45300 SUNGAI BESAR SELANGOR		3.66528	100.987	3.6652761, 100.9874991	Alive	Chinese	Citizen	Female	MALAYSIA	Single/Sporadic	Lab confirmed Positive	Passive	PCR	2
397	2012_96	2012	45	NO. 6, JALAN MARSOM, PT 12 BARAT SG PANJANG SG BESAR		3.72918	101.091	3.729181, 101.090695	Alive	Malay	Citizen	Male	MALAYSIA	Single/Sporadic	Lab confirmed Positive	Passive	PCR	2
380	2012_79	2012	11	PARIT 3 SUNGAI HAJI DORANI SUNGAI BESAR		3.63897	101.029	3.638966, 101.0289899	Alive	Malay	Citizen	Female	MALAYSIA	Single/Sporadic	Lab confirmed Positive	Passive	PCR	2
417	2012_116	2012	76	LOT. 14, TAMAN SERI LIAM, ULU YAM BHARU.		3.43712	101.656	3.4371155, 101.6564119	Deceased	Malay	Citizen	Female	MALAYSIA	Single/Sporadic	Lab confirmed Positive	Passive	MAT	2
390	2012_89	2012	24	LRG KUBUR, KG. BAGAN NIRA, SABAK BERNAM		3.78918	100.993	3.7891783, 100.9934131	Alive	Foreigners	Non-citizen	Female	INDONESIA	Single/Sporadic	Lab confirmed Positive	Passive	PCR	2
392	2012_91	2012	19	KLINIK DESA KAMPUNG BARU SABAK SELANGOR		3.79283	100.955	3.792832, 100.9548821	Alive	Malay	Citizen	Male	MALAYSIA	Single/Sporadic	Lab confirmed Positive	Passive	PCR	2
433	2012_132	2012	39	NO. 85, JALAN MERANTI 3A/19, BANDAR UTAMA BATANG KALI		3.46122	101.652	3.4612153, 101.6520662	Alive	Malay	Citizen	Male	MALAYSIA	Single/Sporadic	Lab confirmed Positive	Passive	PCR	2
303	2012_2	2012	50	B80 JLN MP 46, KG MATANG PAGAR		3.24295	101.563	3.2429524, 101.5629117	Alive	Malay	Citizen	Male	MALAYSIA	Single/Sporadic	Lab confirmed Positive	Passive	SEROLOGY	2
383	2012_82	2012	15	278 JALAN BAN LAMA, SG. HJ. DORANI, SG. BESAR		3.63897	101.029	3.638966, 101.0289899	Alive	Malay	Citizen	Male	MALAYSIA	Single/Sporadic	Lab confirmed Positive	Passive	PCR	2
391	2012_90	2012	7	NO 6,JLN MELATI KG TEBUK PULAI		3.71993	100.972	3.7199288, 100.972476	Alive	Malay	Citizen	Female	MALAYSIA	Single/Sporadic	Lab confirmed Positive	Passive	PCR	2
428	2012_127	2012	35	NO. 176, JALAN ARIF 10, TAMAN ARIF UTAMA, KUALA KUBU BHARU		3.56204	101.646	3.5620432, 101.6462563	Alive	Malay	Citizen	Male	MALAYSIA	Single/Sporadic	Lab confirmed Positive	Passive	PCR	3
423	2012_122	2012	56	LOT. 492, KG. PAYA DALAM, KUALA KUBU BHARU		3.56834	101.63	3.5683443, 101.6297988	Alive	Malay	Citizen	Male	MALAYSIA	Single/Sporadic	Lab confirmed Positive	Passive	PCR	3
446	2012_145	2012	29	NO. 30, JLN. TERATAI 7, SEKSYEN BB 2, BUKIT BERUNTUNG, RAWANG		3.42451	101.565	3.4245058, 101.5645958	Alive	Indian	Citizen	Male	MALAYSIA	Single/Sporadic	Lab confirmed Positive	Passive	MAT	3
422	2012_121	2012	81	NO. 142, KG. JAWA KERLING, HULU SELANGOR		3.58648	101.593	3.586477, 101.593228	Alive	Malay	Citizen	Male	MALAYSIA	Single/Sporadic	Lab confirmed Positive	Passive	PCR	3
421	2012_120	2012	73	NO. 142, KG. JAWA, KERLING		3.58648	101.593	3.586477, 101.593228	Alive	Malay	Citizen	Female	MALAYSIA	Single/Sporadic	Lab confirmed Positive	Passive	PCR	3
424	2012_123	2012	56	NO. 18B, KG. PAYA DALAM, KUALA KUBU BHARU		3.56834	101.63	3.5683443, 101.6297988	Alive	Malay	Citizen	Male	MALAYSIA	Single/Sporadic	Lab confirmed Positive	Passive	PCR	3
425	2012_124	2012	43	NO. 457/1, JKR QUARTERS, JLN. PAHANG, KUALA KUBU BHARU		3.56529	101.666	3.5652934, 101.6655457	Alive	Malay	Citizen	Male	MALAYSIA	Single/Sporadic	Lab confirmed Positive	Passive	MAT	3
418	2012_117	2012	30	KAMI FOOD SERVICE SDN BHD LOT 8 JALAN SUNGAI TUA ULU YAM BHARU		3.42795	101.659	3.427953, 101.659144	Alive	Foreigners	Non-citizen	Male	MYANMAR	Single/Sporadic	Lab confirmed Positive	Passive	MAT	3
407	2012_106	2012	29	NO.28, JALAN WATAN 5, TAMAN SRI WATAN, AMPANG		3.13836	101.774	3.1383559, 101.7737895	Alive	Malay	Citizen	Female	MALAYSIA	Single/Sporadic	Lab confirmed Positive	Passive	SEROLOGY	3
405	2012_104	2012	20	N12-3B TMN KAJANG SENTRAL KAJANG		2.97728	101.793	2.977278, 101.7930931	Alive	Malay	Citizen	Male	MALAYSIA	Single/Sporadic	Lab confirmed Positive	Passive	MAT	3
388	2012_87	2012	9	NO 9 JALAN 2 TAMAN SERENDAH SABAK BERNAM		3.76477	100.989	3.7647659, 100.9886077	Alive	Indian	Citizen	Female	MALAYSIA	Single/Sporadic	Lab confirmed Positive	Passive	MAT	3
308	2012_7	2012	33	99 JALAN 7/10,BLOK 7 BANDAR TASIK PUTERI,48000 RAWANG		3.284	101.474	3.2840043, 101.4737967	Alive	Malay	Citizen	Female	MALAYSIA	Single/Sporadic	Lab confirmed Positive	Passive	SEROLOGY	4
332	2012_31	2012	30	19,LINTANG SUNGAI 5,OFF JLN TEPI SUNGAI,KLANG		3.05112	101.436	3.0511161, 101.435728	Alive	Indian	Citizen	Male	MALAYSIA	Single/Sporadic	Lab confirmed Positive	Passive	SEROLOGY	4
349	2012_48	2012	5	NO 23 TAMAN MERBAH 18 OLAK LEMPIT		2.83584	101.58	2.8358423, 101.5796988	Alive	Malay	Citizen	Female	MALAYSIA	Single/Sporadic	Lab confirmed Positive	Passive	SEROLOGY	4
364	2012_63	2012	22	NO 111 BLOCK 5D FLAT PKNS SEK 7 S. ALAM		3.07051	101.484	3.0705071, 101.4842009	Alive	Malay	Citizen	Female	MALAYSIA	Single/Sporadic	Lab confirmed Positive	Passive	SEROLOGY	4
376	2012_75	2012	19	4261 C JLN KUALA SELANGOR, KG SG PLONG, SG BULOH		3.20949	101.537	3.2094913, 101.5367827	Alive	Malay	Citizen	Male	MALAYSIA	Single/Sporadic	Lab confirmed Positive	Passive	SEROLOGY	4
322	2012_21	2012	20	18 JALAN SUNGAI CHADONG 2C,TAMAN ARMADA PUTRA, PULAU INDAH		2.97549	101.349	2.9754902, 101.3487799	Alive	Malay	Citizen	Male	MALAYSIA	Single/Sporadic	Lab confirmed Positive	Passive	ELISA	4
369	2012_68	2012	33	LOT 626,JLN LEMBAH SATU,PADANG JAWA,SHAH ALAM		3.04893	101.492	3.0489335, 101.4920588	Alive	Foreigners	Non-citizen	Male	BANGLADESH	Single/Sporadic	Lab confirmed Positive	Passive	SEROLOGY	4
379	2012_78	2012	25	KG. BATU 38 BAROH, SABAK BERNAM		3.73441	100.938	3.7344056, 100.9380555	Alive	Malay	Citizen	Male	MALAYSIA	Single/Sporadic	Lab confirmed Positive	Passive	PCR	4
329	2012_28	2012	25	3 LORORNG WAKAF KAMPUNG 4 3/4 JALAN KAPAR		3.16763	101.429	3.1676286, 101.4293187	Alive	Malay	Citizen	Male	MALAYSIA	Single/Sporadic	Lab confirmed Positive	Passive	ELISA	4
368	2012_67	2012	24	2-3-11,PPURI PERDANA,JLN LOMPAT PAGAR,SEK.13,SHAH ALAM		3.07328	101.518	3.073281, 101.518461	Alive	Malay	Citizen	Female	MALAYSIA	Single/Sporadic	Lab confirmed Positive	Passive	SEROLOGY	4
331	2012_30	2012	50	TBG 952,JLN TEPI SUNGAI,KLANG		3.04632	101.434	3.0463194, 101.4344717	Alive	Indian	Citizen	Male	MALAYSIA	Single/Sporadic	Lab confirmed Positive	Passive	ELISA	4
445	2012_144	2012	42	NO M-1-29 APT KENANGA TAMAN BUNGA RAYA BUKIT BERUNTUNG RAWANG		3.43799	101.551	3.4379889, 101.5508346	Alive	Malay	Citizen	Male	MALAYSIA	Single/Sporadic	Lab confirmed Positive	Passive	MAT	4
406	2012_105	2012	48	N0 1-14, JLN TEMBUSU TMN IMPIAN EHSAN SERI KEMBANGAN, SELANGOR		3.01443	101.755	3.0144295, 101.7552584	Alive	Foreigners	Non-citizen	Male	INDONESIA	Single/Sporadic	Lab confirmed Positive	Passive	MAT	4
411	2012_110	2012	18	Jln Broga, 43500 Semenyih, Selangor		2.94298	101.873	2.9429753, 101.8731992	Alive	Foreigners	Non-citizen	Male	PAKISTAN	Single/Sporadic	Lab confirmed Positive	Passive	PCR	4
323	2012_22	2012	24	LOT 3806 KG DELEK KANAN KLANG		3.03946	101.412	3.039465, 101.4119752	Alive	Malay	Citizen	Male	MALAYSIA	Single/Sporadic	Lab confirmed Positive	Passive	ELISA	4
427	2012_126	2012	41	PT 195 JALAN 4 TAMAN AMPANG INDAH KUALA KUBU BHARU		3.5472	101.656	3.5471952, 101.6556071	Alive	Malay	Citizen	Male	MALAYSIA	Single/Sporadic	Lab confirmed Positive	Passive	SEROLOGY	4
363	2012_62	2012	30	9-1 PANGSAPURI SERI NIPAH TMN PINGGIRAN USJ SUBANG JAYA		3.05224	101.558	3.0522359, 101.5581554	Alive	Malay	Citizen	Male	MALAYSIA	Single/Sporadic	Lab confirmed Positive	Passive	SEROLOGY	4
431	2012_130	2012	11	NO. 13, JLN. SAMUDERA 6, TAMAN SAMUDERA, HULU BERNAM		3.67076	101.519	3.6707599, 101.5191301	Alive	Malay	Citizen	Female	MALAYSIA	Single/Sporadic	Lab confirmed Positive	Passive	SEROLOGY	4
402	2012_101	2012	50	NO 57 JALAN 5/9, TAMAN LANGAT J, SECTION 5, BANDAR BANGI, SELANGOR		2.96355	101.787	2.963555, 101.787311	Alive	Malay	Citizen	Female	MALAYSIA	Single/Sporadic	Lab confirmed Positive	Passive	PCR	5
444	2012_143	2012	30	NO 2 JALAN KEMBOJA 4A/5 BUKIT SENTOSA RAWANG		3.41657	101.594	3.4165683, 101.5942005	Alive	Malay	Citizen	Male	MALAYSIA	Single/Sporadic	Lab confirmed Positive	Passive	PCR	5
371	2012_70	2012	59	NO.70,JLN KAP 17/17,SEK.17,SHAH ALAM		3.04371	101.505	3.0437128, 101.5047586	Alive	Malay	Citizen	Male	MALAYSIA	Single/Sporadic	Lab confirmed Positive	Passive	SEROLOGY	5
356	2012_55	2012	17	NO 15, JLN SS 9/5, 47300, SG WEI PETALING JAYA		3.08546	101.618	3.085459, 101.6182437	Alive	Malay	Citizen	Male	MALAYSIA	Single/Sporadic	Lab confirmed Positive	Passive	Rapid Test	5
440	2012_139	2012	39	NO. 3, JALAN RAMPAISARI 2B/3, BANDAR SG. BUAYA		3.37854	101.528	3.3785421, 101.5280852	Alive	Malay	Citizen	Male	MALAYSIA	Single/Sporadic	Lab confirmed Positive	Passive	SEROLOGY	5
372	2012_71	2012	24	NO.22,JLN PANGKALAN 19/50,SEK.19,SHAH ALAM		3.05146	101.532	3.0514588, 101.5317702	Alive	Malay	Citizen	Female	MALAYSIA	Single/Sporadic	Lab confirmed Positive	Passive	SEROLOGY	5
355	2012_54	2012	19	NO 104 JLN 1A/7 BANDAR BARU SG BULOH		3.21216	101.568	3.2121628, 101.5675567	Alive	Malay	Citizen	Male	MALAYSIA	Single/Sporadic	Lab confirmed Positive	Passive	SEROLOGY	5
415	2012_114	2012	17	NO 30, KG PADANG, ULU YAM BHARU		3.44558	101.652	3.4455768, 101.6518397	Alive	Malay	Citizen	Male	MALAYSIA	Single/Sporadic	Lab confirmed Positive	Passive	SEROLOGY	5
430	2012_129	2012	30	NO. 38, TAMAN PERINDUSTRIAN FELCRA, SG. GUMUT, KALUMPANG.		3.63871	101.573	3.638709, 101.5729639	Alive	Foreigners	Non-citizen	Male	INDONESIA	Single/Sporadic	Lab confirmed Positive	Passive	MAT	5
358	2012_57	2012	29	88 JLN PLATINUM 54,SEK.7 SHAH ALAM		3.27322	101.45	3.2732194, 101.4497607	Alive	Malay	Citizen	Male	MALAYSIA	Single/Sporadic	Lab confirmed Positive	Passive	SEROLOGY	5
414	2012_113	2012	41	ROCK ECORESORT,KM 7,JLN ULU YAM-SG TUA,ULU YAM BARU,BTG KALI		3.43434	101.657	3.4343438, 101.656627	Alive	Malay	Citizen	Male	MALAYSIA	Single/Sporadic	Lab confirmed Positive	Passive	SEROLOGY	5
339	2012_38	2012	22	BATU 24, KANCHONG TENGAH, BANTING		2.74942	101.495	2.7494157, 101.495003	Alive	Malay	Citizen	Male	MALAYSIA	Cluster/Outbreak	Lab confirmed Positive	Active	SEROLOGY	5
341	2012_40	2012	17	BATU 24, JALAN BAKTI, KANCHONG TENGAH		2.73905	101.498	2.7390538, 101.4977522	Alive	Malay	Citizen	Male	MALAYSIA	Cluster/Outbreak	Lab confirmed Positive	Active	SEROLOGY	5
342	2012_41	2012	20	LOT 2271, JALAN SERAI, KAMPUNG KANCHONG TENGAH, BANTING		2.74852	101.506	2.7485224, 101.5059655	Alive	Malay	Citizen	Male	MALAYSIA	Cluster/Outbreak	Lab confirmed Positive	Active	SEROLOGY	5
354	2012_53	2012	31	BLOK C-1 38/39 JLN 2 TMN SRI SUBANG,PETALING JAYA		3.08404	101.634	3.0840363, 101.6335682	Alive	Foreigners	Non-citizen	Male	MYANMAR	Single/Sporadic	Lab confirmed Positive	Passive	SEROLOGY	5
317	2012_16	2012	1	NO 39 JALAN HIJAU TAMAN KG KUANTAN SELANGOR		3.03986	101.463	3.0398635, 101.4629342	Alive	Malay	Citizen	Male	MALAYSIA	Single/Sporadic	Lab confirmed Positive	Passive	PCR	5
320	2012_19	2012	24	B-10-02,PPURI RIMBA,JLN LENGKUAS 16/19,SEK.16,SHAH ALAM		3.05437	101.484	3.0543688, 101.4843645	Alive	Malay	Citizen	Male	MALAYSIA	Single/Sporadic	Lab confirmed Positive	Passive	ELISA	5
401	2012_100	2012	22	CONGKAK PARK RESORT, KG PADANG HULU LANGAT		3.21004	101.843	3.2100407, 101.8432558	Deceased	Malay	Citizen	Male	MALAYSIA	Single/Sporadic	Lab confirmed Positive	Passive	SEROLOGY	5
313	2012_12	2012	23	NO.24, JALAN AU1C/3H, TAMAN KERAMAT PERMAI		3.17546	101.745	3.1754574, 101.7449768	Alive	Malay	Citizen	Male	MALAYSIA	Single/Sporadic	Lab confirmed Positive	Passive	SEROLOGY	6
345	2012_44	2012	29	LADANG SIME DARBY, PULAU CAREY, BANTING.		2.91638	101.352	2.9163839, 101.3516769	Alive	Foreigners	Non-citizen	Male	INDONESIA	Single/Sporadic	Lab confirmed Positive	Passive	ELISA	6
324	2012_23	2012	55	NO371 JLN SUTERA TMN MAZNAH KG JAWA KLANG		3.0256	101.477	3.0255983, 101.4769022	Alive	Indian	Citizen	Male	MALAYSIA	Single/Sporadic	Lab confirmed Positive	Passive	ELISA	6
365	2012_64	2012	32	WISMA SITAMAS JLN PAHAT 16/8A SHAH ALAM		3.05455	101.508	3.0545465, 101.5081021	Alive	Foreigners	Non-citizen	Male	NEPAL	Single/Sporadic	Lab confirmed Positive	Passive	SEROLOGY	6
370	2012_69	2012	33	313,BLOK 16,SEKSYEN 20,SHAH ALAM		3.05538	101.539	3.055377, 101.5391002	Alive	Malay	Citizen	Male	MALAYSIA	Single/Sporadic	Lab confirmed Positive	Passive	SEROLOGY	6
381	2012_80	2012	16	NO 10, JALAN 8, TAMAN MUHIBBAH, SABAK BERNAM, SELANGOR.		3.75963	100.979	3.7596264, 100.9790196	Alive	Malay	Citizen	Female	MALAYSIA	Single/Sporadic	Lab confirmed Positive	Passive	PCR	6
305	2012_4	2012	40	BLOK A,TINGKAT 4 FLAT DANAU REBUNG 47000 SG BULOH...		3.21566	101.582	3.2156635, 101.5818534	Alive	Malay	Citizen	Male	MALAYSIA	Single/Sporadic	Lab confirmed Positive	Passive	SEROLOGY	6
435	2012_134	2012	29	NO. 169, JLN. MERANTI 5, BDR. BARU BATANG KALI		3.45641	101.65	3.4564129, 101.6497852	Alive	Indian	Citizen	Male	MALAYSIA	Single/Sporadic	Lab confirmed Positive	Passive	SEROLOGY	6
398	2012_97	2012	16	NO 7 LORONG 1KG DATO HORMAT,SG AIR TAWAR		3.77558	100.882	3.775584, 100.8820721	Alive	Malay	Citizen	Male	MALAYSIA	Single/Sporadic	Lab confirmed Positive	Passive	MAT	6
348	2012_47	2012	57	NO. 12, JALAN TILAPIA 7, TAMAN SERI PUTRA, BANTING.		2.80727	101.491	2.8072742, 101.4913932	Alive	Malay	Citizen	Female	MALAYSIA	Single/Sporadic	Lab confirmed Positive	Passive	SEROLOGY	7
366	2012_65	2012	36	NO 76 KG BARU SUNGAI BULOH, BELAKANG ARROW SUPERMARKET		3.19353	101.57	3.1935278, 101.569722	Alive	Foreigners	Non-citizen	Male	INDIA	Single/Sporadic	Lab confirmed Positive	Passive	SEROLOGY	7
357	2012_56	2012	24	LC-04-08,TMN SRI AMAN,PETALING JAYA		3.12789	101.594	3.1278871, 101.5944885	Alive	Malay	Citizen	Female	MALAYSIA	Single/Sporadic	Lab confirmed Positive	Passive	SEROLOGY	7
373	2012_72	2012	34	NO 106 BLOK 12 JALAN 6/1K SEKSYEN 6 SHAH ALAM, SELANGOR		3.15413	101.528	3.1541345, 101.5284557	Alive	Malay	Citizen	Female	MALAYSIA	Single/Sporadic	Lab confirmed Positive	Passive	SEROLOGY	7
410	2012_109	2012	23	BLOK A-13-12 AMPANG PRIMA CONDO JALAN WAWASAN KUALA LUMPUR		3.12118	101.764	3.1211826, 101.7637775	Deceased	Chinese	Citizen	Female	MALAYSIA	Single/Sporadic	Lab confirmed Positive	Passive	SEROLOGY	7
310	2012_9	2012	63	LOT 1852 3E JLN TENGAH 8 KG TENGAH BT 6 GOMBAK		3.2535	101.653	3.2535016, 101.6533256	Alive	Malay	Citizen	Female	MALAYSIA	Single/Sporadic	Lab confirmed Positive	Passive	SEROLOGY	7
362	2012_61	2012	46	NO 218 BLOK 3 TGKT 1 JLN PJS/14 BDR SUNWAY		3.06837	101.602	3.0683743, 101.6024829	Alive	Malay	Citizen	Male	MALAYSIA	Single/Sporadic	Lab confirmed Positive	Passive	SEROLOGY	7
334	2012_33	2012	60	LOT 3070 KG DELEK BARU KLANG		3.03146	101.403	3.0314571, 101.4030823	Alive	Malay	Citizen	Male	MALAYSIA	Single/Sporadic	Lab confirmed Positive	Passive	ELISA	7
314	2012_13	2012	42	8E/8/8 MUTIARA CONDUMINIUM, BUKIT INDAH, AMPANG		3.15077	101.781	3.15077, 101.7805564	Alive	Malay	Citizen	Male	MALAYSIA	Single/Sporadic	Lab confirmed Positive	Passive	SEROLOGY	7
432	2012_131	2012	29	NO 66 JALAN MELUR TAMAN SRI BATANG KALI		3.46362	101.651	3.463617, 101.6506454	Alive	Malay	Citizen	Male	MALAYSIA	Single/Sporadic	Lab confirmed Positive	Passive	SEROLOGY	7
353	2012_52	2012	19	LADANG BUKIT IJOK, JALAN MERBAU, JERAM		3.25808	101.401	3.2580839, 101.4008854	Alive	Malay	Citizen	Male	MALAYSIA	Single/Sporadic	Lab confirmed Positive	Passive	SEROLOGY	8
302	2012_1	2012	80	A-3-9, PANGSAPURI DANAU REBUNG, JALAN HOSPITAL SUNGAI BULOH, 47000 SELANGOR.		3.21566	101.582	3.2156635, 101.5818534	Alive	Malay	Citizen	Male	MALAYSIA	Single/Sporadic	Lab confirmed Positive	Passive	MAT	8
441	2012_140	2012	39	B-5-21 APT KENANGA TAMAN BUNGA RAYA BUKIT BERUNTUNG		3.43905	101.545	3.439045, 101.545301	Alive	Indian	Citizen	Male	MALAYSIA	Single/Sporadic	Lab confirmed Positive	Passive	SEROLOGY	8
426	2012_125	2012	23	NO. 256 B, TMN. AMPANG INDAH, KUALA KUBU BHARU		3.54626	101.657	3.5462594, 101.6566353	Alive	Malay	Citizen	Male	MALAYSIA	Single/Sporadic	Lab confirmed Positive	Passive	SEROLOGY	9
442	2012_141	2012	35	NO. 47, KAMPONG ORANG ASLI, BUKIT MANCHONG, SERENDAH.		3.4184	101.544	3.4183967, 101.5441247	Alive	Malay	Citizen	Male	MALAYSIA	Single/Sporadic	Lab confirmed Positive	Passive	SEROLOGY	9
448	2012_147	2012	54	NO. 31, JALAN BAKAWALI 2A, BUKIT SENTOSA, RAWANG.		3.40938	101.601	3.4093805, 101.6005912	Alive	Malay	Citizen	Male	MALAYSIA	Single/Sporadic	Lab confirmed Positive	Passive	SEROLOGY	9
360	2012_59	2012	3	G 2-A 7/5 PENGKALAN UDARA SUBANG SHAH ALAM, SELANGOR		3.11353	101.547	3.1135324, 101.5466637	Alive	Malay	Citizen	Male	MALAYSIA	Single/Sporadic	Lab confirmed Positive	Passive	PCR	9
403	2012_102	2012	49	BATU 13 1/2 JALAN CHERAS KAJANG		3.0129	101.777	3.0128991, 101.7768848	Alive	Malay	Citizen	Male	MALAYSIA	Single/Sporadic	Lab confirmed Positive	Passive	MAT	10
429	2012_128	2012	62	NO. 35, JALAN TERATAI 7, TAMAN SERI TERATAI, KUALA KUBU BHARU		3.56011	101.646	3.560112, 101.645748	Alive	Malay	Citizen	Male	MALAYSIA	Single/Sporadic	Lab confirmed Positive	Passive	SEROLOGY	10
343	2012_42	2012	18	LOT. 62, BATU 27, SG. MORIB, BANTING.		2.75123	101.444	2.751226, 101.4436451	Alive	Malay	Citizen	Male	MALAYSIA	Single/Sporadic	Lab confirmed Positive	Passive	SEROLOGY	11
346	2012_45	2012	24	T.86, JALAN MELATI, TAMN SRI TELOK DATOK,BANTING		2.81601	101.52	2.8160096, 101.5198129	Alive	Malay	Citizen	Male	MALAYSIA	Single/Sporadic	Lab confirmed Positive	Passive	SEROLOGY	11
377	2012_76	2012	21	NO 17 JLN APOLO U5, CG BDR PINGGIRAN SUBANG, SHAH ALAM		3.13578	101.541	3.135782, 101.5413052	Alive	Malay	Citizen	Male	MALAYSIA	Single/Sporadic	Lab confirmed Positive	Passive	PCR	11
447	2012_146	2012	38	NO 51 JLN MELATI 1 TMN SERI SERENDAH		3.37439	101.616	3.3743876, 101.6156747	Alive	Malay	Citizen	Male	MALAYSIA	Single/Sporadic	Lab confirmed Positive	Passive	SEROLOGY	11
400	2012_99	2012	42	LOT 1075 KG TASIK SENATA INDAH KUALA PAJAM		3.13851	101.687	3.1385059, 101.6869895	Alive	Malay	Citizen	Female	MALAYSIA	Single/Sporadic	Lab confirmed Positive	Passive	PCR	11
344	2012_43	2012	17	B-41 JLN SEMARAK, KG MELAYU , PULAU CAREY		2.8192	101.37	2.8192011, 101.370271	Alive	Malay	Citizen	Female	MALAYSIA	Single/Sporadic	Lab confirmed Positive	Passive	SEROLOGY	11
347	2012_46	2012	21	NO.7, JALAN BERINGIN 2, TAMAN SARI, BANTING		2.81449	101.502	2.8144909, 101.5017351	Alive	Indian	Citizen	Male	MALAYSIA	Single/Sporadic	Lab confirmed Positive	Passive	SEROLOGY	11
412	2012_111	2012	37	DARUL ATIQ RASA		3.52314	101.633	3.5231404, 101.6332763	Alive	Malay	Citizen	Male	MALAYSIA	Single/Sporadic	Lab confirmed Positive	Passive	SEROLOGY	11
338	2012_37	2012	17	LOT 159 NO 3A JALAN SIMPANG MORIB		2.78553	101.463	2.7855266, 101.4630194	Alive	Malay	Citizen	Male	MALAYSIA	Single/Sporadic	Lab confirmed Positive	Passive	SEROLOGY	11
434	2012_133	2012	15	NO.4 JALAN MERANTI,2C/1 BANDAR UTAMA,BATANG KALI,SELANGOR		3.46053	101.657	3.460533, 101.656526	Alive	Malay	Citizen	Male	MALAYSIA	Single/Sporadic	Lab confirmed Positive	Passive	SEROLOGY	11
404	2012_103	2012	19	NO 8 JALAN IMPIAN JAYA 11 SAUJANA IMPIAN KAJANG		3.01107	101.793	3.0110721, 101.7929977	Alive	Malay	Citizen	Male	MALAYSIA	Single/Sporadic	Lab confirmed Positive	Passive	PCR	11
340	2012_39	2012	40	LOT 197 JLN RAMBUTAN, KG. ENDAH, banting selangor		2.73111	101.472	2.7311116, 101.4717572	Alive	Malay	Citizen	Male	MALAYSIA	Single/Sporadic	Lab confirmed Positive	Passive	MAT	11
367	2012_66	2012	42	NO 25 JLN PP3/3 TMN PUTRA PERMAI PUCHONG		2.97459	101.592	2.9745946, 101.5919013	Alive	Foreigners	Non-citizen	Male	INDONESIA	Single/Sporadic	Lab confirmed Positive	Passive	SEROLOGY	11
438	2012_137	2012	64	NO. 55, JALAN CEMPERAI 10, TAMAN RASA UTAMA, RASA		3.48682	101.63	3.4868178, 101.6296572	Alive	Indian	Citizen	Male	MALAYSIA	Single/Sporadic	Lab confirmed Positive	Passive	SEROLOGY	12
350	2012_49	2012	27	SAUJANA UTAMA(RUMAH KONGSI BERHAMPIRAN IRIS APARTMEN)		3.21029	101.48	3.2102945, 101.480282	Alive	Foreigners	Non-citizen	Male	INDONESIA	Single/Sporadic	Lab confirmed Positive	Passive	SEROLOGY	12
408	2012_107	2012	13	NO 339 LORONG IKAN EMAS 9, KG TASIK AMPANG, 68000 SELANGOR.		3.1333	101.772	3.1332996, 101.7721916	Alive	Malay	Citizen	Male	MALAYSIA	Single/Sporadic	Lab confirmed Positive	Passive	SEROLOGY	12
437	2012_136	2012	65	NO. 33, JALAN CEMPERAI 6, TAMAN RASA UTAMA, RASA		3.48761	101.63	3.4876094, 101.6300791	Alive	Indian	Citizen	Male	MALAYSIA	Single/Sporadic	Lab confirmed Positive	Passive	SEROLOGY	12
396	2012_95	2012	63	T-24 JALAN SELEKOH BAGAN TERAP SG BESAR		3.74687	101.056	3.746866, 101.056091	Alive	Malay	Citizen	Female	MALAYSIA	Single/Sporadic	Lab confirmed Positive	Passive	ELISA	12
386	2012_85	2012	17	NO 117B LRG 8 KG BARU NELAYAN SUNGAI BESAR		3.6719	100.978	3.6719001, 100.9776347	Alive	Malay	Citizen	Male	MALAYSIA	Single/Sporadic	Lab confirmed Positive	Passive	ELISA	12
394	2012_93	2012	62	JALAN BESAR PARIT BARU SUNGAI AYER TAWAR		3.84413	100.896	3.8441266, 100.8956516	Alive	Malay	Citizen	Female	MALAYSIA	Single/Sporadic	Lab confirmed Positive	Passive	PCR	12
439	2012_138	2012	37	LADANG GETAH WIDURI BUKIT SENTOSA		3.39846	101.568	3.398464, 101.5676399	Alive	Foreigners	Non-citizen	Male	MYANMAR	Single/Sporadic	Lab confirmed Positive	Passive	SEROLOGY	12
315	2012_14	2012	39	LOT 10434 C-18 JLN KAMPUNG JAWA BATU 41/2 KLANG		3.01213	101.49	3.0121255, 101.4902345	Alive	Indian	Citizen	Female	MALAYSIA	Single/Sporadic	Lab confirmed Positive	Passive	SEROLOGY	12
419	2012_118	2012	16	NO 36 JALAN AROWANA 7 TAMAN DESA ULU YAM BHARU		3.43958	101.66	3.4395759, 101.6598521	Alive	Malay	Citizen	Male	MALAYSIA	Single/Sporadic	Lab confirmed Positive	Passive	SEROLOGY	12
485	2013_37	2013	20	NO 703 BLOK 1 APARTMENT KOMUTER JAYA JALAN PARANG 19/8,SHAH ALAM.		3.05504	101.526	3.0550384, 101.5259494	Alive	Malay	Citizen	Male	MALAYSIA	Single/Sporadic	Lab confirmed Positive	Passive	MAT	12
543	2013_95	2013	43	1 JLN 8 TMN JELOK INDAH SUNGAI JELOK		2.99062	101.806	2.990615, 101.8057651	Alive	Chinese	Citizen	Male	MALAYSIA	Single/Sporadic	Lab confirmed Positive	Passive	SEROLOGY	12
576	2013_128	2013	37	6 JLN TTS TMN PELANGI,SEMENYIH		2.94744	101.845	2.947441, 101.8451441	Alive	Malay	Citizen	Male	MALAYSIA	Single/Sporadic	Lab confirmed Positive	Passive	SEROLOGY	12
503	2013_55	2012	31	ARA DAMANSARA,PETALING JAYA		3.12444	101.583	3.1244431, 101.583075	Alive	Foreigners	Non-citizen	Male	BANGLADESH	Single/Sporadic	Lab confirmed Positive	Passive	PCR	1
531	2013_83	2013	45	BLOK L- 15, JALAN KEMBOJA 2, IPD SEPANG		2.80297	101.741	2.8029702, 101.7407864	Alive	Malay	Citizen	Female	MALAYSIA	Single/Sporadic	Lab confirmed Positive	Passive	SEROLOGY	1
542	2013_94	2013	32	6 JALAN BA/3 KAWASAN PERINDUSTRIAN BUKIT ANGKAT SG CHUA		3.0058	101.768	3.0058029, 101.7684949	Alive	Foreigners	Non-citizen	Male	MYANMAR	Single/Sporadic	Lab confirmed Positive	Passive	MAT	1
557	2013_109	2013	22	NO 29, TINGKAT 1, BUNGA 7, TAMAN MUDA, AMPANG		3.11928	101.757	3.119282, 101.756795	Alive	Foreigners	Non-citizen	Male	INDONESIA	Single/Sporadic	Lab confirmed Positive	Passive	SEROLOGY	1
488	2013_40	2013	37	TAC CONTRACT, 43-A, JALAN KENARI 7C, BANDAR PUCHONG JAYA, PUCHONG		3.04503	101.622	3.0450315, 101.6220637	Alive	Foreigners	Non-citizen	Male	BANGLADESH	Single/Sporadic	Lab confirmed Positive	Passive	SEROLOGY	1
569	2013_121	2013	32	NO 18 JALAN 34 KG CHERAS BARU JALAN CHERAS 56100		3.10924	101.75	3.1092417, 101.7498589	Deceased	Chinese	Citizen	Male	MALAYSIA	Single/Sporadic	Lab confirmed Positive	Passive	SEROLOGY	1
457	2013_9	2013	36	375A, JALAN MELATI, KAMPUNG CHANGKAT, GREENWOOD, SELAYANG		3.2301	101.707	3.2301003, 101.7067013	Alive	Malay	Citizen	Male	MALAYSIA	Single/Sporadic	Lab confirmed Positive	Passive	SEROLOGY	1
534	2013_86	2013	28	PANGSAPURI RISTA VILLA 06-G-04, TMN PUTRA PERDANA PUCHONG		2.94605	101.608	2.946046, 101.6075961	Alive	Malay	Citizen	Male	MALAYSIA	Single/Sporadic	Lab confirmed Positive	Passive	MAT	1
466	2013_18	2013	21	NO 16A JELAWAT A6,TMN SRI ANDALAS		3.01978	101.451	3.019775, 101.450543	Alive	Pribumi Sabah	Citizen	Male	MALAYSIA	Single/Sporadic	Lab confirmed Positive	Passive	SEROLOGY	1
463	2013_15	2013	22	65 JLN BUKIT INDAH 2/2, TAMAN BUKIT INDAH, AMPANG		3.15126	101.776	3.1512601, 101.7762419	Alive	Malay	Citizen	Male	MALAYSIA	Single/Sporadic	Lab confirmed Positive	Passive	SEROLOGY	1
510	2013_62	2013	15	PT 1322 TAMAN FERI 45200 SABAK BERNAM		3.7639	100.988	3.763901, 100.9881749	Alive	Malay	Citizen	Male	MALAYSIA	Single/Sporadic	Lab confirmed Positive	Passive	PCR	1
484	2013_36	2013	28	MHE DEMAG(M) PT. 79, SEC 26, HICOM INDUSTRIAL AREA, SHAH ALAM		3.07328	101.518	3.073281, 101.518461	Deceased	Indian	Citizen	Male	MALAYSIA	Single/Sporadic	Lab confirmed Positive	Passive	SEROLOGY	1
450	2013_2	2013	27	74, JALAN 4 TAMAN AMANIAH, BATU CAVES		3.23738	101.675	3.2373815, 101.6750947	Alive	Malay	Citizen	Male	MALAYSIA	Single/Sporadic	Lab confirmed Positive	Passive	SEROLOGY	1
549	2013_101	2013	27	44 JALAN SG KANTAN KAJANG		3.00313	101.791	3.0031308, 101.7906965	Alive	Malay	Citizen	Male	MALAYSIA	Single/Sporadic	Lab confirmed Positive	Passive	MAT	1
575	2013_127	2013	37	BJ-G-1 JLN PANDAN INDAH 5/2 PANDAN INDAH		3.1288	101.755	3.1288011, 101.7546804	Alive	Others	Citizen	Male	MALAYSIA	Single/Sporadic	Lab confirmed Positive	Passive	SEROLOGY	1
548	2013_100	2013	21	LM 2-5 TAMAN BUKIT KENANGAN KAJANG		2.98471	101.813	2.9847137, 101.8125639	Alive	Malay	Citizen	Male	MALAYSIA	Single/Sporadic	Lab confirmed Positive	Passive	MAT	2
589	2013_141	2013	15	IKBN PERETAK		3.54726	101.678	3.5472602, 101.6780548	Alive	Malay	Citizen	Male	MALAYSIA	Cluster/Outbreak	Lab confirmed Positive	Passive	MAT	2
449	2013_1	2013	46	LOT 258B, JALAN INDAH 14, KAMPUNG SELAYANG INDAH, BATU CAVES		3.24787	101.665	3.2478708, 101.6646501	Alive	Malay	Citizen	Male	MALAYSIA	Single/Sporadic	Lab confirmed Positive	Passive	SEROLOGY	2
552	2013_104	2013	30	RUMAH KONGSI DAMAI PERDANA CHERAS		3.04706	101.739	3.0470559, 101.7394477	Deceased	Foreigners	Non-citizen	Female	INDONESIA	Single/Sporadic	Lab confirmed Positive	Passive	MAT	2
554	2013_106	2013	50	240 PERSIARAN DESA AMPANG 8 TAMAN SRI AMPANG		3.14121	101.774	3.1412116, 101.7736879	Alive	Malay	Citizen	Female	MALAYSIA	Single/Sporadic	Lab confirmed Positive	Passive	SEROLOGY	2
547	2013_99	2013	53	JKR 1339-F3 BLOK D RUMAH KELAMIN BALAI POLIS KAJANG		2.99352	101.787	2.993518, 101.7874058	Alive	Malay	Citizen	Male	MALAYSIA	Single/Sporadic	Lab confirmed Positive	Passive	MAT	2
545	2013_97	2013	23	CN-G-3 BLOK NURI QRTS PENJARA KAJANG		3.01304	101.819	3.0130407, 101.8191081	Alive	Malay	Citizen	Male	MALAYSIA	Single/Sporadic	Lab confirmed Positive	Passive	MAT	2
591	2013_143	2013	17	IKBN PERETAK		3.54726	101.678	3.5472602, 101.6780548	Alive	Malay	Citizen	Male	MALAYSIA	Cluster/Outbreak	Lab confirmed Positive	Active	MAT	2
566	2013_118	2013	14	NO 35 JLN 3/1 KAMPUNG TASIK TAMBAHAN AMPANG		3.12767	101.776	3.1276678, 101.7759926	Alive	Malay	Citizen	Male	MALAYSIA	Single/Sporadic	Lab confirmed Positive	Passive	SEROLOGY	2
561	2013_113	2013	1	BLOK A3-3-12 JALAN MEWAH PANDAN MEWAH AMPANG		3.13957	101.76	3.1395699, 101.7597975	Alive	Malay	Citizen	Male	MALAYSIA	Single/Sporadic	Lab confirmed Positive	Passive	SEROLOGY	2
471	2013_23	2013	25	NO 70, JALAN MELOR 1, SUNGAI BULOH COUNTRY RESORT, 47000, SUNAGAI BULOH, SELANGOR		3.20501	101.472	3.2050137, 101.4719647	Deceased	Malay	Citizen	Female	MALAYSIA	Single/Sporadic	Lab confirmed Positive	Passive	PCR	2
468	2013_20	2013	14	NO 11 LORONG SG KAPAR INDAH 13D TAMAN SUNGAI KAPAR INDAH		3.10212	101.381	3.102119, 101.3805302	Alive	Malay	Citizen	Male	MALAYSIA	Single/Sporadic	Lab confirmed Positive	Passive	PCR	2
473	2013_25	2013	25	APARTMENT BAIDURI, M2-3-104, BLOK M2,JALAN SERUM,7/31A,SEKSYEN 7,SHAH ALAM		3.07411	101.492	3.0741068, 101.4922193	Alive	Malay	Citizen	Male	MALAYSIA	Single/Sporadic	Lab confirmed Positive	Passive	SEROLOGY	2
602	2013_154	2013	1	NO. 31, KG KOSKAN, JLN SG BUAYA, SG CHOH, 48000 RAWANG		3.3446	101.58	3.3446015, 101.5796433	Alive	Malay	Citizen	Male	MALAYSIA	Single/Sporadic	Lab confirmed Positive	Passive	SEROLOGY	3
459	2013_11	2013	30	A315, JALAN UKAY PERDANA 2, TAMAN UKAY PERDANA, AMPANG		3.20842	101.782	3.2084159, 101.7815913	Alive	Malay	Citizen	Male	MALAYSIA	Single/Sporadic	Lab confirmed Positive	Passive	SEROLOGY	3
536	2013_88	2013	33	35 JLN KESUMA 4B BANDAR TASEK KESUMA BERANANG		2.91364	101.871	2.9136396, 101.8708121	Alive	Malay	Citizen	Male	MALAYSIA	Single/Sporadic	Lab confirmed Positive	Passive	MAT	3
492	2013_44	2013	60	LOT 51 ,KG KUALA SUNGAI BARU,PUCHONG		2.99946	101.583	2.999463, 101.5830163	Alive	Malay	Citizen	Male	MALAYSIA	Single/Sporadic	Lab confirmed Positive	Passive	Rapid Test	3
541	2013_93	2013	30	45 BLOK E RUMAH MURAH KG. PADANG, KAJANG		2.99352	101.787	2.993518, 101.7874058	Alive	Malay	Citizen	Male	MALAYSIA	Single/Sporadic	Lab confirmed Positive	Passive	SEROLOGY	3
474	2013_26	2013	20	NO 37 JALAN LANGKAP SATU 18/6A SEKSYEN 18 SHAH ALAM		3.04609	101.522	3.046092, 101.5219096	Alive	Indian	Citizen	Male	MALAYSIA	Single/Sporadic	Lab confirmed Positive	Passive	PCR	3
486	2013_38	2013	17	626 JALAN 1B/5 BDR BARU SUNGAI BULOH		3.21551	101.565	3.2155084, 101.565151	Alive	Malay	Citizen	Male	MALAYSIA	Single/Sporadic	Lab confirmed Positive	Passive	SEROLOGY	3
540	2013_92	2013	25	LOT 4837 KG KANTAN SG TEKALI HULU LANGAT SELANGOR		3.1219	101.867	3.1219, 101.86687	Alive	Malay	Citizen	Male	MALAYSIA	Single/Sporadic	Lab confirmed Positive	Passive	SEROLOGY	3
455	2013_7	2013	19	ARA 30, TING. 4, ASRAMA LELAKI INSTITUT KRAFTANGAN NEGARA, RAWANG, SELANGOR		3.29145	101.635	3.291447, 101.634736	Alive	Malay	Citizen	Male	MALAYSIA	Single/Sporadic	Lab confirmed Positive	Passive	SEROLOGY	3
559	2013_111	2013	69	NO 28 JALAN 23 TAMAN PUTRA AMPANG		3.11982	101.764	3.1198166, 101.764034	Alive	Chinese	Citizen	Male	MALAYSIA	Single/Sporadic	Lab confirmed Positive	Passive	SEROLOGY	3
452	2013_4	2013	29	16,JALAN 3/3A,TAMAN PENGGIRAN BATU CAVES		3.25334	101.697	3.2533445, 101.6973337	Alive	Foreigners	Non-citizen	Male	BANGLADESH	Single/Sporadic	Lab confirmed Positive	Passive	SEROLOGY	3
588	2013_140	2013	18	NO. 9, KAMPONG ORANG ASLI, TUN ABD. RAZAK, KUALA KUBU BHARU, SELANGOR.		3.57084	101.657	3.570845, 101.6569411	Alive	Aborigins	Citizen	Male	MALAYSIA	Single/Sporadic	Lab confirmed Positive	Passive	SEROLOGY	3
490	2013_42	2013	40	NO.309,BLOK 20, SEKYSEN 6,SHAH ALAM		3.08784	101.524	3.087843, 101.5239199	Alive	Foreigners	Non-citizen	Female	INDONESIA	Single/Sporadic	Lab confirmed Positive	Passive	SEROLOGY	3
574	2013_126	2013	39	1-8 BLOK BUNGA RAYA , JALAN DAGANG 5/1A TAMAN DAGANG 68000 AMPANG.		3.14671	101.755	3.1467134, 101.7547388	Alive	Malay	Citizen	Male	MALAYSIA	Single/Sporadic	Lab confirmed Positive	Passive	SEROLOGY	3
506	2013_58	2013	23	NO 30 PARIT 6 TIMUR, SUNGAI BESAR		3.69466	101.031	3.694663, 101.031385	Alive	Malay	Citizen	Male	MALAYSIA	Single/Sporadic	Lab confirmed Positive	Passive	SEROLOGY	4
590	2013_142	2013	32	BLK C-3-1, QUARTERS KAKITANGAN RUMAH EHSAN KUALA KUBU BHARU		3.57001	101.644	3.5700086, 101.6435065	Alive	Malay	Citizen	Male	MALAYSIA	Single/Sporadic	Lab confirmed Positive	Passive	SEROLOGY	4
538	2013_90	2013	30	BT 14, TMN WAWASAN , HULU LANGAT		2.93178	101.764	2.9317764, 101.763761	Alive	Malay	Citizen	Male	MALAYSIA	Single/Sporadic	Lab confirmed Positive	Passive	SEROLOGY	4
469	2013_21	2013	16	LOT 11680 NO.2 KG DELEK BARU		3.02847	101.405	3.0284693, 101.4052481	Alive	Malay	Citizen	Female	MALAYSIA	Single/Sporadic	Lab confirmed Positive	Passive	ELISA	4
578	2013_130	2013	50	NO 19 JLN 3/2 TAMAN SRI HANECO SEMENYIH		2.97223	101.872	2.9722343, 101.8719751	Deceased	Malay	Citizen	Female	MALAYSIA	Single/Sporadic	Lab confirmed Positive	Passive	MAT	4
579	2013_131	2013	18	80 JLN TPS 1/14 TMN PELANGI SEMENYIH SEMENYIH		2.93086	101.861	2.9308571, 101.8605584	Alive	Malay	Citizen	Male	MALAYSIA	Single/Sporadic	Lab confirmed Positive	Passive	MAT	4
568	2013_120	2013	34	NO 14 JALAN TERATAI 1/11C TAMAN BUKIT TERATAI 68000 AMPANG		3.1195	101.769	3.1195005, 101.7685973	Alive	Malay	Citizen	Male	MALAYSIA	Single/Sporadic	Lab confirmed Positive	Passive	SEROLOGY	4
487	2013_39	2013	31	LOT 223 KAMPUNG PAYAJARAS HILIR, SUNGAI BULOH		3.19305	101.539	3.1930481, 101.5389891	Alive	Malay	Citizen	Male	MALAYSIA	Single/Sporadic	Lab confirmed Positive	Passive	MAT	4
505	2013_57	2013	32	NO 174 JALAN 6 ,KG BARU SG WAY,PETALING JAYA,		3.08799	101.61	3.087987, 101.610284	Alive	Foreigners	Non-citizen	Female	INDONESIA	Single/Sporadic	Lab confirmed Positive	Passive	SEROLOGY	4
555	2013_107	2013	33	LOT 643 AMPANG KG TASEK PERMAI LORONG PERMAI J 68000 AMPANG, SELANGOR		3.12505	101.783	3.1250509, 101.7827875	Alive	Foreigners	Non-citizen	Male	BANGLADESH	Single/Sporadic	Lab confirmed Positive	Passive	SEROLOGY	4
460	2013_12	2013	29	NO5A,LORONG AWAN 5 JALAN KG KUALA AMPANG		3.16778	101.746	3.1677843, 101.7461911	Alive	Foreigners	Non-citizen	Female	INDONESIA	Single/Sporadic	Lab confirmed Positive	Passive	SEROLOGY	4
524	2013_76	2013	14	NO 2 ,JALAN TROPIKANA 11,TAMAN PRIMA TROPIKANA,SERI KEMBANGAN		3.022	101.706	3.021998, 101.7055411	Alive	Malay	Citizen	Male	MALAYSIA	Single/Sporadic	Lab confirmed Positive	Passive	SEROLOGY	4
493	2013_45	2013	29	SA-D3-05 BLOK D ,PANGSAPURI BARATJALAN BS 11/12,TAMAN BUKIT SERDANG,SERI KEMBANGAN		3.03698	101.689	3.0369833, 101.6891515	Alive	Malay	Citizen	Male	MALAYSIA	Single/Sporadic	Lab confirmed Positive	Passive	Rapid Test	4
597	2013_149	2013	19	NO 20 KG ORANG ASLI ULU TAMU BATANG KALI		3.46886	101.697	3.4688555, 101.6965114	Alive	Aborigins	Citizen	Male	MALAYSIA	Single/Sporadic	Lab confirmed Positive	Passive	SEROLOGY	4
465	2013_17	2013	40	LOT 2691 NO.1B JALAN TERSEDIA KERETAPI LAMA, KG SG PINANG PULAU INDAH SELANGOR		2.93568	101.32	2.9356823, 101.3200744	Alive	Malay	Citizen	Male	MALAYSIA	Single/Sporadic	Lab confirmed Positive	Passive	ELISA	4
586	2013_138	2013	61	66, JALAN AMPANG, TAMAN AMPANG PECAH, KUALA KUBU BHARU.		3.16061	101.74	3.1606082, 101.7402206	Alive	Chinese	Citizen	Male	MALAYSIA	Single/Sporadic	Lab confirmed Positive	Passive	SEROLOGY	5
594	2013_146	2013	68	NO. 42, JALAN BESAR, KALUMPANG.		3.63871	101.573	3.638709, 101.5729639	Alive	Chinese	Citizen	Female	MALAYSIA	Single/Sporadic	Lab confirmed Positive	Passive	SEROLOGY	5
601	2013_153	2013	13	NO. 17, JALAN CEMPERAI 2C, TAMAN RASA UTAMA, RASA.		3.49073	101.632	3.4907334, 101.6315323	Alive	Chinese	Citizen	Male	MALAYSIA	Single/Sporadic	Lab confirmed Positive	Passive	SEROLOGY	5
528	2013_80	2013	30	NO 39 A ,JLN HAJI HANAFI,DESA PUTRA,KAJANG		2.91359	101.724	2.9135917, 101.724311	Alive	Malay	Citizen	Male	MALAYSIA	Single/Sporadic	Lab confirmed Positive	Passive	Rapid Test	5
535	2013_87	2013	44	KG SESAPAN BATU REMBAU BERANANG		2.89219	101.88	2.8921885, 101.880039	Alive	Foreigners	Non-citizen	Female	INDONESIA	Single/Sporadic	Lab confirmed Positive	Passive	MAT	5
563	2013_115	2013	46	NO 16 TNGKT 11 BLOK E FLAT SRI NILAM BDR AMPANG 68000 SELANGOR		3.13824	101.769	3.1382421, 101.7691478	Alive	Others	Citizen	Male	MALAYSIA	Single/Sporadic	Lab confirmed Positive	Passive	SEROLOGY	5
577	2013_129	2013	50	LOT 1274 KAMPUNG BATU 3 JALAN BANGI 46000,SEMENYIH		2.90392	101.805	2.9039237, 101.8051956	Deceased	Malay	Citizen	Female	MALAYSIA	Single/Sporadic	Lab confirmed Positive	Passive	SEROLOGY	5
571	2013_123	2013	67	M3-G-06 BLOK M3 JALAN PANDAN INDAH 6/1 PANDAN INDAH KUALA LUMPUR		3.13477	101.758	3.1347692, 101.7575406	Deceased	Chinese	Citizen	Male	MALAYSIA	Single/Sporadic	Lab confirmed Positive	Passive	SEROLOGY	5
470	2013_22	2013	21	NO 17 JALAN ANGGERIK ARANDA 31/19, KOTA KEMUNING SHAH ALAM		3.00015	101.548	3.0001526, 101.5482935	Deceased	Malay	Citizen	Male	MALAYSIA	Single/Sporadic	Lab confirmed Positive	Passive	SEROLOGY	5
498	2013_50	2013	22	NO.34,JALAN KP 2/2,TAMAAN KOTA PERDANA,BANDAR PUTERI PERMAI ,SERI KEMBANGAN		2.98699	101.663	2.9869947, 101.6628074	Alive	Chinese	Citizen	Female	MALAYSIA	Single/Sporadic	Lab confirmed Positive	Passive	Rapid Test	5
573	2013_125	2013	36	A-15-3A AMPANG PRIMA CONDO JLN WAWASAN 2/5 BDR BARU AMPAN 68000 AMPANG SELANGOR		3.14456	101.766	3.1445635, 101.7662837	Alive	Foreigners	Non-citizen	Female	SRI LANKA	Single/Sporadic	Lab confirmed Positive	Passive	SEROLOGY	5
514	2013_66	2013	41	NO 22 JLN SERENDAH, TAMAN SERENDAH, SABAK BERNAM		3.75528	100.984	3.755283, 100.9841925	Alive	Indian	Citizen	Male	MALAYSIA	Single/Sporadic	Lab confirmed Positive	Passive	PCR	5
593	2013_145	2013	28	DEPAN KILANG KAYU KG GUMUT KALUMPANG		3.62293	101.577	3.62293, 101.5771259	Alive	Foreigners	Non-citizen	Male	INDONESIA	Single/Sporadic	Lab confirmed Positive	Passive	SEROLOGY	5
494	2013_46	2013	33	NO 21 & 21A JALAN TIARA ,TIARA SQUARE,TAMAN PERINDUSTRIAN UEP,SUBANG JAYA		3.04465	101.569	3.0446489, 101.5688414	Alive	Foreigners	Non-citizen	Male	BANGLADESH	Single/Sporadic	Lab confirmed Positive	Passive	SEROLOGY	5
587	2013_139	2013	65	NO 32, KG TUN RAZAK, KUALA KUBU BHARU		3.56093	101.659	3.560932, 101.658546	Alive	Aborigins	Citizen	Male	MALAYSIA	Single/Sporadic	Lab confirmed Positive	Passive	SEROLOGY	5
467	2013_19	2013	21	LOT 5005 BATU 5 1/4 JLN MERU,KLANG		3.12189	101.44	3.1218879, 101.4402685	Alive	Foreigners	Non-citizen	Male	NEPAL	Single/Sporadic	Lab confirmed Positive	Passive	MAT	5
509	2013_61	2013	20	PARIT 3 SUNGAI HAJI DORANI SUNGAI BESAR		3.63897	101.029	3.638966, 101.0289899	Alive	Malay	Citizen	Male	MALAYSIA	Single/Sporadic	Lab confirmed Positive	Passive	PCR	6
477	2013_29	2013	45	A507 ARMANEE CONDO JLN PJU 10/1C DAMANSARA DAMAI		3.19257	101.599	3.1925728, 101.5994249	Alive	Chinese	Citizen	Female	MALAYSIA	Single/Sporadic	Lab confirmed Positive	Passive	SEROLOGY	6
476	2013_28	2013	51	NO 12A,LORONG PJU,SUNWAY DAMANSARA		3.14977	101.6	3.1497706, 101.5996135	Alive	Chinese	Citizen	Male	MALAYSIA	Single/Sporadic	Lab confirmed Positive	Passive	SEROLOGY	6
600	2013_152	2013	48	NO. 7, JALAN MAHAGONI 1B/2, BATANG KALI.		3.45889	101.664	3.4588854, 101.6636909	Alive	Malay	Citizen	Male	MALAYSIA	Single/Sporadic	Lab confirmed Positive	Passive	SEROLOGY	6
495	2013_47	2013	54	BTM SECURITY SERVICES SDN BHD , NO 12A JLN SS 3/35,UNIVERSITY GARDEN,PETALING JAYA,		3.09757	101.613	3.0975719, 101.6128151	Alive	Malay	Citizen	Male	MALAYSIA	Single/Sporadic	Lab confirmed Positive	Passive	SEROLOGY	6
516	2013_68	2013	37	TEBOK RUKUN, PARIT BARU, SG AIR TAWAR, SABAK BERNAM		3.77558	100.882	3.775584, 100.8820721	Alive	Malay	Citizen	Male	MALAYSIA	Single/Sporadic	Lab confirmed Positive	Passive	PCR	6
560	2013_112	2013	53	36 JALAN 5/4 TMN SERI RAYA , TASEK TAMBAHAN AMPANG, AMPANG		3.12266	101.768	3.1226568, 101.7676391	Alive	Malay	Citizen	Male	MALAYSIA	Single/Sporadic	Lab confirmed Positive	Passive	SEROLOGY	6
556	2013_108	2013	61	NO 7 JALAN AMPANG SAUJANA 1, AMPANG SAUJANA, AMPANG		3.13603	101.788	3.1360327, 101.7883169	Alive	Chinese	Citizen	Male	MALAYSIA	Single/Sporadic	Lab confirmed Positive	Passive	SEROLOGY	6
480	2013_32	2013	45	29, JLN TMP 5, TMN MUTIARA PUCHONG, PUCHONG		3.03514	101.612	3.035138, 101.6120862	Alive	Chinese	Citizen	Male	MALAYSIA	Single/Sporadic	Lab confirmed Positive	Passive	SEROLOGY	6
539	2013_91	2013	63	BATU 21 SUNGAI LUI 43100 HULU LANGAT SELANGOR		3.16236	101.889	3.1623621, 101.8887191	Alive	Malay	Citizen	Male	MALAYSIA	Single/Sporadic	Lab confirmed Positive	Passive	SEROLOGY	6
567	2013_119	2013	39	B2-6-12A PANDAN COURT 2 JLN MEWAH UTARA JLN MEWAH UTARA		3.12894	101.764	3.1289376, 101.7644474	Alive	Malay	Citizen	Female	MALAYSIA	Single/Sporadic	Lab confirmed Positive	Passive	SEROLOGY	6
530	2013_82	2013	45	JABATAN IMIGRESEN MALAYSIA ,NEGERI SELANGOR,(DEPOT IMIGRESEN KLIA),JALAN PEKELILING 4,SEPANG		2.75963	101.732	2.7596287, 101.7316917	Deceased	Foreigners	Non-citizen	Female	INDONESIA	Single/Sporadic	Lab confirmed Positive	Passive	SEROLOGY	6
598	2013_150	2013	51	NO. 33, JALAN MERANTI 3A/14, BANDAR BARU, BATANG KALI.		3.45957	101.652	3.4595731, 101.6515394	Alive	Malay	Citizen	Male	MALAYSIA	Single/Sporadic	Lab confirmed Positive	Passive	SEROLOGY	6
529	2013_81	2013	46	NO 5-08 BLOK EPISIA ,TMN DESA SENTOSA FASA 2,TERAS JERNANG,BANDAR BARU BANGI		2.92254	101.758	2.9225397, 101.7583554	Alive	Malay	Citizen	Female	MALAYSIA	Single/Sporadic	Lab confirmed Positive	Passive	SEROLOGY	6
520	2013_72	2013	49	NO.16 PARIT 16, SG. PANJANG, SG. BESAR		3.73195	101.107	3.7319503, 101.1069196	Alive	Malay	Citizen	Male	MALAYSIA	Single/Sporadic	Lab confirmed Positive	Passive	PCR	6
511	2013_63	2013	25	LOT 119, JLN TEBUK ABDULLAH BATU 1, SEPINTAS, sabak, selangor		3.78434	101.003	3.7843445, 101.0033232	Alive	Malay	Citizen	Female	MALAYSIA	Single/Sporadic	Lab confirmed Positive	Passive	PCR	7
570	2013_122	2013	40	LOT 35D KG PINGGIR 3 LEMBAH JAYA UTARA 68000 AMPANG SEL		3.1404	101.782	3.1404031, 101.7819906	Alive	Malay	Citizen	Female	MALAYSIA	Single/Sporadic	Lab confirmed Positive	Passive	SEROLOGY	7
526	2013_78	2013	82	RUMAH JAGAAN DAN RAWATAN ORANG TUA AL-IKHLAS, LOT 3530,JLN BT 18,KG PULAU MERANTI,47120 PUCHONG SELANGOR.		2.96306	101.622	2.9630592, 101.6215757	Alive	Malay	Citizen	Female	MALAYSIA	Single/Sporadic	Lab confirmed Positive	Passive	SEROLOGY	7
584	2013_136	2013	15	NO 9 KAMPONG ESTET KERLING		3.59379	101.603	3.59379, 101.6029372	Alive	Aborigins	Citizen	Male	MALAYSIA	Single/Sporadic	Lab confirmed Positive	Passive	SEROLOGY	7
551	2013_103	2013	53	NO 8 JALAN KARUNMAS 8 TAMAN DESA KARUN MAS		3.00598	101.755	3.005984, 101.7554721	Alive	Chinese	Citizen	Male	MALAYSIA	Single/Sporadic	Lab confirmed Positive	Passive	MAT	7
504	2013_56	2013	24	BLOK H 222A, NO 9 APARTMENT IDAMAN JLN PJU, 10/1 DAMANSARA DAMAI, PETALING JAYA, SELANGOR		3.19066	101.592	3.190659, 101.592366	Alive	Malay	Citizen	Male	MALAYSIA	Single/Sporadic	Lab confirmed Positive	Passive	MAT	7
478	2013_30	2013	31	33,JLN MUTIARA 2/10,TAMAN MUTIARA INDAH,PUCHONG		2.99301	101.635	2.993008, 101.6346609	Alive	Chinese	Citizen	Female	MALAYSIA	Single/Sporadic	Lab confirmed Positive	Passive	PCR	7
502	2013_54	2013	18	4-4-14, GUGUSAN SIANTAN, SEK 5, 5/7, JLN SEPAH PUTERI, KOTA DAMANSARA		3.15562	101.585	3.1556181, 101.5851692	Alive	Malay	Citizen	Male	MALAYSIA	Single/Sporadic	Lab confirmed Positive	Passive	SEROLOGY	7
572	2013_124	2013	30	NO 9 B JALAN TAMAN CAHAYA 14 ,AMPANG SELANGOR		3.14288	101.755	3.142876, 101.7546908	Alive	Others	Citizen	Male	MALAYSIA	Single/Sporadic	Lab confirmed Positive	Passive	SEROLOGY	7
595	2013_147	2013	49	RUMAH KONGSI SG SABAI, KELUMPANG KUALA KUBU BARU		3.60683	101.54	3.6068275, 101.5402532	Alive	Foreigners	Non-citizen	Male	INDONESIA	Single/Sporadic	Lab confirmed Positive	Passive	SEROLOGY	7
499	2013_51	2013	36	NO 410 BLOK F ,TMN DESA SERDANG,SERI KEMBANGAN		3.03087	101.778	3.0308669, 101.7782808	Alive	Malay	Citizen	Male	MALAYSIA	Single/Sporadic	Lab confirmed Positive	Passive	SEROLOGY	7
491	2013_43	2013	21	F 1220, MENTARI COURT, BANDAR SUNWAY		3.08134	101.611	3.0813392, 101.6105336	Alive	Malay	Citizen	Female	MALAYSIA	Single/Sporadic	Lab confirmed Positive	Passive	PCR	7
585	2013_137	2013	18	KAMPONG ORANG ASLI KUALA KERLING		3.13851	101.687	3.1385059, 101.6869895	Alive	Aborigins	Citizen	Female	MALAYSIA	Single/Sporadic	Lab confirmed Positive	Passive	SEROLOGY	7
497	2013_49	2013	35	NO 26, JLN ANGGERIK 5, TMN PUCHONG PERDANA, PUCHONG, SELANGOR		3.00961	101.601	3.0096113, 101.6007796	Alive	Indian	Citizen	Male	MALAYSIA	Single/Sporadic	Lab confirmed Positive	Passive	SEROLOGY	7
483	2013_35	2013	55	193, JALAN MEDAN 31, TAMAN BUANA PERDANA, PETALING JAYA		3.07349	101.64	3.0734869, 101.6395713	Alive	Foreigners	Non-citizen	Female	INDONESIA	Single/Sporadic	Lab confirmed Positive	Passive	SEROLOGY	7
518	2013_70	2013	23	LOT 233, PARIT 13 SUNGAI PANJANG , SUNGAI BESAR.		3.71947	101.083	3.7194675, 101.0834072	Alive	Malay	Citizen	Male	MALAYSIA	Single/Sporadic	Lab confirmed Positive	Passive	PCR	8
496	2013_48	2013	16	LOT 21 BT 13,JALAN KLANG KG TENGAH PUCHONG,47100 PUCHONG		3.02022	101.592	3.0202184, 101.5924244	Alive	Malay	Citizen	Male	MALAYSIA	Single/Sporadic	Lab confirmed Positive	Passive	SEROLOGY	8
507	2013_59	2013	79	PARIT CHANGKAT JALAN PEKET 20, SG BESAR		3.65087	101.059	3.6508683, 101.0594093	Alive	Malay	Citizen	Male	MALAYSIA	Single/Sporadic	Lab confirmed Positive	Passive	ELISA	8
512	2013_64	2013	27	NO 15 JALAN 2, TAMAN BERNAM JAYA, SABAK BERNAM		3.76471	100.989	3.7647093, 100.9886521	Alive	Malay	Citizen	Male	MALAYSIA	Single/Sporadic	Lab confirmed Positive	Passive	ELISA	8
501	2013_53	2013	30	NO.5, JALAN 18, TAMAN BUKIT KUCHAI, BATU 8, JALAN PUCHONG		3.05541	101.64	3.0554097, 101.6399967	Alive	Indian	Citizen	Male	MALAYSIA	Single/Sporadic	Lab confirmed Positive	Passive	SEROLOGY	8
500	2013_52	2013	26	A-03-02 PANGSAPURI LILI ,PERSIARAN PRIMA UTAMA,PUCHONG PRIMA 47100,		2.98809	101.596	2.98809, 101.5956839	Alive	Foreigners	Non-citizen	Female	INDONESIA	Single/Sporadic	Lab confirmed Positive	Passive	SEROLOGY	9
582	2013_134	2013	19	PUSAT PERMUNIAN AKIDAH BAITUL IMAN		3.40509	101.669	3.4050891, 101.6690139	Alive	Malay	Citizen	Male	MALAYSIA	Cluster/Outbreak	Lab confirmed Positive	Passive	SEROLOGY	9
583	2013_135	2013	26	PUSAT PERMURNIAAN AKIDAH BAITUL IMAN ULU YAM BHARU		3.40509	101.669	3.4050891, 101.6690139	Alive	Malay	Citizen	Male	MALAYSIA	Cluster/Outbreak	Lab confirmed Positive	Passive	SEROLOGY	9
513	2013_65	2013	66	NO 11 JLN UTAMA, TAMAN KENANGAN, SABAK BERNAM		3.7671	100.976	3.767104, 100.9757948	Alive	Indian	Citizen	Male	MALAYSIA	Single/Sporadic	Lab confirmed Positive	Passive	PCR	9
475	2013_27	2013	9	LOT 3689 JALAN SELUANG, LORONG HARUAN 2, KG BUKIT LANCHONG, SEKSYEN 28, SHAH ALAM		2.9882	101.556	2.9882048, 101.5563705	Alive	Malay	Citizen	Male	MALAYSIA	Single/Sporadic	Lab confirmed Positive	Passive	SEROLOGY	9
472	2013_24	2013	17	NO 153 JLN 18/34 SEK 18 SHAH ALAM		3.07328	101.518	3.073281, 101.518461	Alive	Malay	Citizen	Male	MALAYSIA	Single/Sporadic	Lab confirmed Positive	Passive	SEROLOGY	9
544	2013_96	2013	36	ALAMAT DI BALAKONG (BERHAMPIRAN DENGAN TAPAK PROJEK)		3.02568	101.738	3.0256822, 101.738147	Alive	Foreigners	Non-citizen	Female	BANGLADESH	Single/Sporadic	Lab confirmed Positive	Passive	SEROLOGY	9
596	2013_148	2013	50	NO. 428, JALAN BESAR, KAMPUNG PASIR PUTIH, KALUMPANG (NAHARA RESORT KALUMPANG)		3.63845	101.573	3.638455, 101.5734409	Alive	Malay	Citizen	Male	MALAYSIA	Single/Sporadic	Lab confirmed Positive	Passive	SEROLOGY	9
481	2013_33	2013	34	A-7-5, PANGSAPURI CASARIANA, PERSIARAN PUNCAK JALIL, SERI KEMBANGAN		3.03585	101.677	3.035845, 101.6774098	Alive	Malay	Citizen	Female	MALAYSIA	Single/Sporadic	Lab confirmed Positive	Passive	SEROLOGY	9
553	2013_105	2013	38	7 JLN CJ 1/7 CHERAS JAYA BALAKONG		3.022	101.764	3.0219953, 101.7641507	Alive	Foreigners	Non-citizen	Male	NEPAL	Single/Sporadic	Lab confirmed Positive	Passive	SEROLOGY	9
564	2013_116	2013	20	BLOK A-2-2, TMN PANDAN MEWAH, JLN PANDAN MEWAH 4, 68000 AMPANG, SELANGOR		3.12669	101.763	3.126689, 101.7632465	Alive	Foreigners	Non-citizen	Male	MYANMAR	Single/Sporadic	Lab confirmed Positive	Passive	MAT	9
525	2013_77	2013	37	89-01-G3 ,SPRING COURT 2,JALAN LINGKARAN DAGANG MAS,TAMAN MAS PUCHONG,PUCHONG		2.97517	101.58	2.975174, 101.580116	Alive	Malay	Citizen	Female	MALAYSIA	Single/Sporadic	Lab confirmed Positive	Passive	SEROLOGY	9
519	2013_71	2013	17	NO 4 , PARIT 18 TANJoNG MEDAN, sungai besar, selangor		3.7455	101.124	3.7455017, 101.1244874	Alive	Malay	Citizen	Male	MALAYSIA	Single/Sporadic	Lab confirmed Positive	Passive	PCR	10
522	2013_74	2013	44	164, TAMAN TELOK MERBAU, SG. PELEK, SELANGOR		2.66203	101.684	2.6620299, 101.6840589	Alive	Indian	Citizen	Male	MALAYSIA	Single/Sporadic	Lab confirmed Positive	Active	SEROLOGY	10
527	2013_79	2013	25	NO 13 JALAN ST 2A, TAMAN MAWAR SEPANG SELANGOR		2.82918	101.736	2.829178, 101.736176	Alive	Malay	Citizen	Male	MALAYSIA	Single/Sporadic	Lab confirmed Positive	Passive	SEROLOGY	10
604	2013_156	2013	36	NO. 38, JALAN MATAHARI 1, TAMAN SERENDAH UTAMA, SERENDAH		3.37003	101.618	3.3700316, 101.6177104	Alive	Malay	Citizen	Male	MALAYSIA	Single/Sporadic	Lab confirmed Positive	Passive	SEROLOGY	10
533	2013_85	2013	53	NO 9 JLN SAUJANA 2/11,TMN DESA SAUJANA,SG MERAB,KAJANG		2.90997	101.739	2.9099727, 101.7392816	Deceased	Malay	Citizen	Female	MALAYSIA	Single/Sporadic	Lab confirmed Positive	Passive	SEROLOGY	10
523	2013_75	2013	29	NO.9, JALAN 8, TAMAN SERI SG. PELEK SELANGOR		2.63675	101.707	2.6367505, 101.7068184	Alive	Foreigners	Non-citizen	Female	INDONESIA	Single/Sporadic	Lab confirmed Positive	Passive	SEROLOGY	10
482	2013_34	2013	62	B10-13-18 JALAN PJS 211 DESA MENTARI 2 46000 PETALING JAYA, SELANGOR		3.08356	101.628	3.0835611, 101.6284061	Alive	Malay	Citizen	Female	MALAYSIA	Single/Sporadic	Lab confirmed Positive	Passive	SEROLOGY	10
565	2013_117	2013	30	BLOK A-3-1-16 JLN MEWAH 4,TMN PANDAN MEWAH		3.12894	101.765	3.1289442, 101.7654981	Alive	Others	Citizen	Female	MALAYSIA	Single/Sporadic	Lab confirmed Positive	Passive	SEROLOGY	10
461	2013_13	2013	20	03-05 BLOK L P/PURI DAHLIA, JLN UKAY BISTARI, TMN UKAY, BISTARI, AMPANG, SEL		3.19956	101.766	3.1995627, 101.7663881	Alive	Malay	Citizen	Male	MALAYSIA	Single/Sporadic	Lab confirmed Positive	Passive	Rapid Test	10
462	2013_14	2013	34	NO30 JLN UB8, TAMAN UKAY BESTARI, AMPANG		3.20051	101.766	3.2005082, 101.7659137	Alive	Chinese	Citizen	Male	MALAYSIA	Single/Sporadic	Lab confirmed Positive	Passive	SEROLOGY	10
603	2013_155	2013	28	B-3-07, APARTMENT TELUKI, BUKIT SENTOSA, RAWANG.		3.39629	101.572	3.3962912, 101.5721682	Alive	Foreigners	Non-citizen	Male	NEPAL	Single/Sporadic	Lab confirmed Positive	Passive	SEROLOGY	10
451	2013_3	2013	46	G11 SRI SIANTAN KOMPLEKS PENJARA SG BULOH		3.22987	101.494	3.2298724, 101.4938785	Alive	Malay	Citizen	Female	MALAYSIA	Single/Sporadic	Lab confirmed Positive	Passive	MAT	10
479	2013_31	2013	27	05-02, VISTA IMPIANA APARTMENT, SERI KEMBANGAN		3.03912	101.691	3.0391231, 101.6908629	Alive	Malay	Citizen	Female	MALAYSIA	Single/Sporadic	Lab confirmed Positive	Passive	SEROLOGY	10
517	2013_69	2013	55	K 132, BATU 7 Kampung Sungai Tengar, Sungai Ayer Tawar, Selangor		3.82432	100.877	3.824323, 100.8771059	Alive	Malay	Citizen	Female	MALAYSIA	Single/Sporadic	Lab confirmed Positive	Passive	MAT	10
537	2013_89	2013	31	BT 20 SUNGAI LUI,HULU LANGAT		3.17203	101.863	3.1720295, 101.8628095	Alive	Malay	Citizen	Male	MALAYSIA	Single/Sporadic	Lab confirmed Positive	Passive	SEROLOGY	10
562	2013_114	2013	15	NO 54 JALAN PANDAN INDAH 2/10 PANDAN INDAH		3.12565	101.75	3.1256523, 101.7495584	Alive	Malay	Citizen	Male	MALAYSIA	Single/Sporadic	Lab confirmed Positive	Passive	SEROLOGY	10
456	2013_8	2013	37	NO. 29, TAMAN BERSATU RAWANG SELANGOR		3.30774	101.581	3.30774, 101.5806269	Deceased	Malay	Citizen	Male	MALAYSIA	Single/Sporadic	Lab confirmed Positive	Passive	Rapid Test	10
458	2013_10	2013	35	02-10-1, DESA VIEW TOWER, TAMAN MELAWATI, HULU KELANG		3.22465	101.741	3.2246538, 101.740613	Alive	Malay	Citizen	Male	MALAYSIA	Single/Sporadic	Lab confirmed Positive	Passive	SEROLOGY	10
453	2013_5	2013	31	SELAYANG MAKMUR		3.24164	101.669	3.2416439, 101.6691434	Alive	Foreigners	Non-citizen	Male	NEPAL	Single/Sporadic	Lab confirmed Positive	Passive	ELISA	11
521	2013_73	2013	47	BLOK K 3-04, APARTMENT SIANTAN, TMN. PUTRA PERDANA 47100 PUCHONG		2.94732	101.622	2.94732, 101.62206	Alive	Malay	Citizen	Female	MALAYSIA	Single/Sporadic	Lab confirmed Positive	Passive	SEROLOGY	11
532	2013_84	2013	24	E-1-14 MEGAH VILLA APARTMENT,JALAN KOTA WARISAN 1/6, KOTA WARISAN		2.82533	101.707	2.8253341, 101.7072048	Alive	Malay	Citizen	Female	MALAYSIA	Single/Sporadic	Lab confirmed Positive	Passive	SEROLOGY	11
464	2013_16	2013	30	2-1G JALAN AU 1A/4A, TAMAN KERAMAT PERMAI		3.17638	101.738	3.1763764, 101.7376259	Alive	Foreigners	Non-citizen	Male	BANGLADESH	Single/Sporadic	Lab confirmed Positive	Passive	SEROLOGY	11
454	2013_6	2013	44	BEST ONE BUILDER, NO.G-6, JALAN SM1, SUNWAY, BATU CAVES		3.23584	101.687	3.2358441, 101.686943	Alive	Foreigners	Non-citizen	Male	INDIA	Single/Sporadic	Lab confirmed Positive	Passive	SEROLOGY	11
592	2013_144	2013	43	NO.10, KAMPUNG BARU KELUMPANG, KUALA KUBU BHARU		3.63871	101.573	3.638709, 101.5729639	Alive	Chinese	Citizen	Female	MALAYSIA	Single/Sporadic	Lab confirmed Positive	Passive	SEROLOGY	11
580	2013_132	2013	11	LOT 660 TAMAN SRI KAMIN ULU YAM BHARU SELANGOR		3.43766	101.664	3.4376587, 101.6641738	Alive	Malay	Citizen	Male	MALAYSIA	Single/Sporadic	Lab confirmed Positive	Passive	SEROLOGY	11
489	2013_41	2013	45	LOT 1042, JALAN CEMPAKA, KAMPUNG SG. KAYU ARA, PETALING JAYA SELANGOR		3.13052	101.613	3.1305198, 101.6129742	Deceased	Indian	Citizen	Male	MALAYSIA	Single/Sporadic	Lab confirmed Positive	Passive	SEROLOGY	11
599	2013_151	2013	20	NO. B 819, TAMAN WAWASAN, BATANG KALI		3.46635	101.651	3.466352, 101.650559	Alive	Malay	Citizen	Male	MALAYSIA	Single/Sporadic	Lab confirmed Positive	Passive	SEROLOGY	12
546	2013_98	2013	4	NO.22A, JALAN 8/35A, TAMAN SERI BANGI, SEKSYEN 8, BANDAR BARU BANGI		2.96419	101.762	2.9641939, 101.7617415	Alive	Malay	Citizen	Female	MALAYSIA	Single/Sporadic	Lab confirmed Positive	Passive	PCR	12
550	2013_102	2013	2	NO 22A,JALAN 8/35A TAMAN SERI BANGI SEKSYEN 8		2.96419	101.762	2.9641939, 101.7617415	Alive	Malay	Citizen	Male	MALAYSIA	Single/Sporadic	Lab confirmed Positive	Passive	PCR	12
581	2013_133	2013	50	LOT 285 BATU 30 JALAN IPOH ULU YAM BATANG KALI		3.42496	101.66	3.424962, 101.659725	Alive	Malay	Citizen	Male	MALAYSIA	Single/Sporadic	Lab confirmed Positive	Passive	SEROLOGY	12
610	2014_6	2014	25	A8-13 TMN RAINTREE UTAMA,BT CAVES		3.2423	101.68	3.2423049, 101.6800393	Alive	Malay	Citizen	Male	MALAYSIA	Single/Sporadic	Lab confirmed Positive	Passive	MAT	12
635	2014_31	2013	62	NO 12 7/74 JALAN NURI KOTA DAMANSARA		3.16221	101.587	3.1622148, 101.5869321	Alive	Indian	Citizen	Male	MALAYSIA	Single/Sporadic	Lab confirmed Positive	Passive	MAT	12
515	2013_67	2013	61	PT 5434 LORONG PROJEK UDANG, PANTAI SIMPANG 5, SG. BESAR.		3.62714	101.053	3.627137, 101.0528435	Alive	Malay	Citizen	Male	MALAYSIA	Single/Sporadic	Lab confirmed Positive	Passive	MAT	12
558	2013_110	2013	66	NO 15B JLN BUNGA TANJUNG 8, TMN PUTRA,68000 AMPANG SELANGOR		3.12063	101.761	3.1206318, 101.7612672	Alive	Chinese	Citizen	Male	MALAYSIA	Single/Sporadic	Lab confirmed Positive	Passive	SEROLOGY	12
508	2013_60	2013	47	PARIT 7 TIMUR		3.69448	101.038	3.694478, 101.0380928	Alive	Malay	Citizen	Male	MALAYSIA	Single/Sporadic	Lab confirmed Positive	Passive	MAT	12
653	2014_49	2014	18	PARIT 11 BAN 1 PASIR PANJANG SEKINCAN		3.58935	101.088	3.5893474, 101.0877892	Alive	Malay	Citizen	Female	MALAYSIA	Single/Sporadic	Lab confirmed Positive	Passive	MAT	12
761	2014_157	2014	46	NO 14 KG OA CHANGKAT BINTANG ,HULU SELANGOR		3.5601	101.658	3.5601046, 101.6583123	Alive	Aborigins	Citizen	Male	MALAYSIA	Single/Sporadic	Lab confirmed Positive	Passive	SEROLOGY	12
624	2014_20	2014	23	BLOK11, NO109 PANGSAPURI RIMAU PERDANA, JALAN SUNGAI GOMBAK, 32/67, SEKSYEN 32, SHAH ALAM.		3.0009	101.522	3.0009046, 101.5224524	Alive	Malay	Citizen	Male	MALAYSIA	Single/Sporadic	Lab confirmed Positive	Passive	MAT	1
657	2014_53	2014	32	NO. 25, JALAN 6B, TAMAN MAWAR, BANDAR BARU SALAK TINGGI, DENGKIL		2.7877	101.715	2.7877034, 101.7147351	Alive	Malay	Citizen	Female	MALAYSIA	Single/Sporadic	Lab confirmed Positive	Active	SEROLOGY	1
614	2014_10	2014	15	KONDO VILLA RIA , BUKIT ANTARABANGSA , KUALA LUMPUR		3.13851	101.687	3.1385059, 101.6869895	Alive	Pribumi Sarawak	Citizen	Female	MALAYSIA	Single/Sporadic	Lab confirmed Positive	Passive	Rapid Test	1
633	2014_29	2014	1	NO 101 BLOK 28 SEKSYEN 24 SHAH ALAM		3.04287	101.522	3.0428724, 101.5218295	Alive	Malay	Citizen	Female	MALAYSIA	Single/Sporadic	Lab confirmed Positive	Passive	SEROLOGY	1
682	2014_78	2014	55	9,LAMAN KASTURI, JLN FECRA SEMUNGKIS, BT 14, HULU LANGAT		3.12462	101.819	3.1246222, 101.8185276	Alive	Malay	Citizen	Male	MALAYSIA	Single/Sporadic	Lab confirmed Positive	Passive	SEROLOGY	1
605	2014_1	2014	2	NO 19 JALAN KOTA PUTERI 5/18B SEKSYEN 5 KOTA PUTERI 48000 RAWANG		3.30698	101.451	3.3069763, 101.4505821	Alive	Malay	Citizen	Female	MALAYSIA	Single/Sporadic	Lab confirmed Positive	Passive	SEROLOGY	1
778	2014_174	2014	57	NO. 112, KG. TOK PINANG, SERENDAH		3.37022	101.604	3.37022, 101.6036905	Alive	Malay	Citizen	Male	MALAYSIA	Single/Sporadic	Lab confirmed Positive	Passive	SEROLOGY	1
668	2014_64	2014	12	NO.65, JALAN DAHLIA 1/2, TAMAN DAHLIA BBST SEPANG		2.83383	101.724	2.8338311, 101.7244568	Alive	Malay	Citizen	Male	MALAYSIA	Single/Sporadic	Lab confirmed Positive	Passive	SEROLOGY	2
794	2014_190	2014	29	NO. 3, JALAN DAHLIA 4, BUKIT BERUNTONG		3.42439	101.557	3.4243887, 101.5568671	Alive	Foreigners	Non-citizen	Male	INDIA	Single/Sporadic	Lab confirmed Positive	Passive	SEROLOGY	2
643	2014_39	2014	72	PT 7341 JALAN MAKMUR, SUNGAI BESAR		3.66751	100.989	3.6675096, 100.988942	Alive	Chinese	Citizen	Female	MALAYSIA	Single/Sporadic	Lab confirmed Positive	Passive	MAT	2
606	2014_2	2014	44	NO.25 JALAN MELATI KG SG TUA BATU CAVES SELANGOR		3.25233	101.675	3.2523311, 101.6753823	Alive	Malay	Citizen	Male	MALAYSIA	Single/Sporadic	Lab confirmed Positive	Passive	ELISA	3
651	2014_47	2014	58	LORONG 1 TEBUK HAJI OMAR, KAMPONG BANTING SEKENDI, SABAK BERNAM		3.74549	100.916	3.7454895, 100.9163468	Alive	Malay	Citizen	Male	MALAYSIA	Single/Sporadic	Lab confirmed Positive	Passive	PCR	3
746	2014_142	2014	55	NO. 5, JLN. KELISA 7B, TMN DESA KELISA, ULU YAM BHARU		3.42147	101.66	3.4214651, 101.6597151	Alive	Malay	Citizen	Female	MALAYSIA	Single/Sporadic	Lab confirmed Positive	Passive	SEROLOGY	3
734	2014_130	2014	22	LOT 10 LORONG DATO MUFTI 10 KG TENGAH LEMBAH JAYA 68000 AMPANG SELANGOR		3.14956	101.781	3.1495576, 101.7807122	Alive	Malay	Citizen	Female	MALAYSIA	Single/Sporadic	Lab confirmed Positive	Passive	SEROLOGY	3
733	2014_129	2014	62	NO 19 JLN BUNGA MELATI 1 TMN MAJU JAYA 56100 KL		3.12992	101.745	3.1299233, 101.7447149	Alive	Malay	Citizen	Male	MALAYSIA	Single/Sporadic	Lab confirmed Positive	Passive	SEROLOGY	3
749	2014_145	2014	14	NO. 15, JLN. 1, TAMAN ZAMRUD, KERLING		2.99693	101.804	2.9969274, 101.8041716	Alive	Indian	Citizen	Male	MALAYSIA	Single/Sporadic	Lab confirmed Positive	Passive	SEROLOGY	3
790	2014_186	2014	50	BLOK K1-8, APT. SRI TROMPET, SEK. BB7, BUKIT BERUNTUNG, RAWANG.		3.41944	101.575	3.4194447, 101.5746241	Alive	Malay	Citizen	Male	MALAYSIA	Single/Sporadic	Lab confirmed Positive	Passive	SEROLOGY	3
737	2014_133	2014	15	NO 20 JLN PANDAN INDAH 16 PANDAN INDAH KL		3.13495	101.75	3.1349543, 101.7495265	Alive	Malay	Citizen	Female	MALAYSIA	Single/Sporadic	Lab confirmed Positive	Passive	SEROLOGY	3
725	2014_121	2014	14	KONDO MEWAH AMPANG, SEBELAH HOSPITAL AMPANG		3.12834	101.763	3.128339, 101.7634717	Alive	Malay	Citizen	Male	MALAYSIA	Single/Sporadic	Lab confirmed Positive	Passive	SEROLOGY	3
758	2014_154	2014	18	NO 17/6C TAMAN TEMPUA BESTARI KALUMPANG		3.62009	101.575	3.6200922, 101.5748548	Alive	Malay	Citizen	Female	MALAYSIA	Single/Sporadic	Lab confirmed Positive	Passive	ELISA	3
791	2014_187	2014	28	NO. 17 & 19, (RUMAH KEDAI), JLN. JENJARUM 3A, BDR. BARU BKT. BERUNTUNG		3.40726	101.558	3.4072565, 101.5581788	Alive	Foreigners	Non-citizen	Male	NEPAL	Single/Sporadic	Lab confirmed Positive	Passive	SEROLOGY	3
720	2014_116	2014	30	B3-07-01 PANGSAPURI TANJUNG MERDEKA VILLA 68000 AMPANG SELANGOR		3.1376	101.766	3.1375992, 101.7661125	Alive	Malay	Citizen	Male	MALAYSIA	Single/Sporadic	Lab confirmed Positive	Passive	SEROLOGY	3
641	2014_37	2014	34	NO 12(3A), JLN SR7/4,SERDANG RAYA43300 SERDANGTEMPAT KERJA; WP MARKETING SDN BHD, SERDANG RAYA01115720624, 01115618504 ISTERI, MIMI		3.04328	101.696	3.0432817, 101.6964973	Alive	Malay	Citizen	Male	MALAYSIA	Single/Sporadic	Lab confirmed Positive	Passive	SEROLOGY	3
636	2014_32	2014	4	NO 3-8 P'PURI SRI NIPAH ,47610 SUBANG JAYA,		3.05673	101.585	3.0567333, 101.5851192	Alive	Malay	Citizen	Female	MALAYSIA	Single/Sporadic	Lab confirmed Positive	Passive	SEROLOGY	3
729	2014_125	2014	27	BLK 4 G-11 PPURI INTAN TMN BKT PERMAI 56100 KUALA LUMPUR		3.11005	101.758	3.110052, 101.7583931	Alive	Malay	Citizen	Male	MALAYSIA	Single/Sporadic	Lab confirmed Positive	Passive	SEROLOGY	3
744	2014_140	2014	69	NO.1068, KG JELUTONG TAMBAHAN, KALUMPANG		3.66067	101.543	3.6606676, 101.5425309	Alive	Malay	Citizen	Female	MALAYSIA	Single/Sporadic	Lab confirmed Positive	Passive	SEROLOGY	4
787	2014_183	2014	3	E-3 13A APT KEMUNING TMN BUNGA RAYA BUKIT BERUNTUNG		3.43799	101.551	3.4379889, 101.5508346	Alive	Malay	Citizen	Female	MALAYSIA	Single/Sporadic	Lab confirmed Positive	Passive	ELISA	4
699	2014_95	2014	25	3 JLN 4/11F SEK 4 TAMBAHAN, BANDAR BARU BANGI,		2.96318	101.781	2.9631841, 101.7807835	Alive	Malay	Citizen	Male	MALAYSIA	Single/Sporadic	Lab confirmed Positive	Passive	SEROLOGY	4
644	2014_40	2014	58	NO 18 SIMPANG 4, SG DEDAP, BAGAN TERAP.		3.75072	101.065	3.7507172, 101.0654021	Alive	Malay	Citizen	Male	MALAYSIA	Single/Sporadic	Lab confirmed Positive	Passive	PCR	4
726	2014_122	2014	2	BH-2-15 JLN PANDAN INDAH 5/20, PANDAN INDAH, AMPANG		3.12855	101.76	3.1285545, 101.7599816	Alive	Malay	Citizen	Male	MALAYSIA	Single/Sporadic	Lab confirmed Positive	Passive	SEROLOGY	4
735	2014_131	2014	19	NO 4-14 TINGKAT 15 PERMAI COURT, 16800 AMPANG		3.15795	101.758	3.1579529, 101.7575028	Alive	Foreigners	Non-citizen	Male	INDONESIA	Single/Sporadic	Lab confirmed Positive	Passive	SEROLOGY	4
679	2014_75	2014	11	F2-05 P/PURI SRI RIA JLN WAWASAN 3 TMN WAWASAN 43100 HULU LANGAT SEL		3.11787	101.812	3.117872, 101.811654	Alive	Malay	Citizen	Female	MALAYSIA	Single/Sporadic	Lab confirmed Positive	Passive	SEROLOGY	4
612	2014_8	2014	16	LOT 414-4, KG CHANGKAT, GOMBAK KL		3.22407	101.706	3.224068, 101.705567	Alive	Malay	Citizen	Male	MALAYSIA	Single/Sporadic	Lab confirmed Positive	Passive	SEROLOGY	4
662	2014_58	2014	85	LOT 6108 JALAN KERMBOJA KG DATO ABU BAKAR KAJANG 03-89252891 RUMAH MENANTU(NORHAYATI) 019-2255799		2.95296	101.735	2.9529582, 101.7352431	Alive	Malay	Citizen	Female	MALAYSIA	Single/Sporadic	Lab confirmed Positive	Passive	SEROLOGY	4
713	2014_109	2014	47	BLOK H-6-10 JALAN IMPIAN INDAH 2 TAMAN IMPIAN INDAH , BALAKONG		3.02434	101.752	3.0243367, 101.7524578	Alive	Chinese	Citizen	Male	MALAYSIA	Single/Sporadic	Lab confirmed Positive	Passive	SEROLOGY	4
724	2014_120	2014	14	B1-1-19 TAMAN AMPANG HILIR KAMPUNG PANDAN 55000 KUALA LUMPUR		3.14964	101.748	3.1496439, 101.7482221	Alive	Malay	Citizen	Male	MALAYSIA	Single/Sporadic	Lab confirmed Positive	Passive	SEROLOGY	4
611	2014_7	2014	18	NO 47 JALAN BIDARA 1/5 TAMAN BIDARA		3.24111	101.643	3.2411081, 101.6430844	Alive	Malay	Citizen	Male	MALAYSIA	Single/Sporadic	Lab confirmed Positive	Passive	Rapid Test	4
722	2014_118	2014	32	NO 88 JLN 4 PANDAN INDAH INDUSTRIAL PARK PANDAN INDAH 55100		3.13461	101.766	3.1346125, 101.7657644	Alive	Foreigners	Non-citizen	Male	BANGLADESH	Single/Sporadic	Lab confirmed Positive	Passive	SEROLOGY	4
629	2014_25	2014	1	409 BLOCK 31, SEKSYEN 24, SHAH ALAM		3.03865	101.518	3.03865, 101.51807	Alive	Chinese	Citizen	Female	MALAYSIA	Single/Sporadic	Lab confirmed Positive	Passive	MAT	4
714	2014_110	2014	34	B1-4-21 JLN DESA PERMAI 13 DESA LEMBAH PERMAI AMPANG		3.14549	101.787	3.1454875, 101.7869749	Alive	Malay	Citizen	Male	MALAYSIA	Single/Sporadic	Lab confirmed Positive	Passive	SEROLOGY	4
650	2014_46	2014	40	127 LORONG MAWAR, JALAN HAJI HARUN, SEPINTAS, SABAK BERNAM.		3.78197	101.01	3.7819659, 101.00959	Alive	Malay	Citizen	Male	MALAYSIA	Single/Sporadic	Lab confirmed Positive	Passive	PCR	4
728	2014_124	2014	26	NO 47 JLN MEWAH 3/4 PANDAN MEWAH 68000 AMPANG SEL		3.12813	101.769	3.1281322, 101.7690137	Alive	Foreigners	Non-citizen	Male	MYANMAR	Single/Sporadic	Lab confirmed Positive	Passive	MAT	4
727	2014_123	2014	23	BLOK B - 5,TINGKAT 2 FLAT TAMAN DATO AHMAD RAZALI 68000 AMPANG,SELANGOR		3.15406	101.757	3.1540623, 101.7571532	Alive	Malay	Citizen	Female	MALAYSIA	Single/Sporadic	Lab confirmed Positive	Passive	SEROLOGY	4
753	2014_149	2014	49	81, KAMPONG ORANG ASLI, TUN ABD. RAZAK, KUALA KUBU BHARU.		3.56093	101.659	3.560932, 101.658546	Alive	Aborigins	Citizen	Male	MALAYSIA	Single/Sporadic	Lab confirmed Positive	Passive	SEROLOGY	4
759	2014_155	2014	84	NO 28 KG GUMUT KALUMPANG		3.62293	101.577	3.62293, 101.5771259	Alive	Malay	Citizen	Male	MALAYSIA	Single/Sporadic	Lab confirmed Positive	Passive	SEROLOGY	4
764	2014_160	2014	26	KILANG AMBASY BATANG KALI		3.46014	101.655	3.4601368, 101.6550138	Alive	Foreigners	Non-citizen	Male	BANGLADESH	Single/Sporadic	Lab confirmed Positive	Passive	SEROLOGY	4
623	2014_19	2014	16	NO 82 LENGKUK SIANTAN 50 TAMAN SRI ANDALAS KLANG		3.01668	101.408	3.0166842, 101.408254	Alive	Malay	Citizen	Male	MALAYSIA	Single/Sporadic	Lab confirmed Positive	Passive	Rapid Test	5
639	2014_35	2014	26	NO 407 BLOK 10 FALT PROTON SEKSYEN 27 SHAH ALAM		3.02333	101.57	3.0233313, 101.5698756	Alive	Malay	Citizen	Male	MALAYSIA	Single/Sporadic	Lab confirmed Positive	Passive	SEROLOGY	5
619	2014_15	2014	41	A4009 BLOKA KLANG VILLA ,PANDAMANRAN 42000,P/KLANG SELANGOR		3.00987	101.41	3.0098706, 101.4096319	Alive	Indian	Citizen	Male	MALAYSIA	Single/Sporadic	Lab confirmed Positive	Passive	PCR	5
760	2014_156	2014	27	NO. 102, KG. GUMUT, KALUMPANG.		3.62293	101.577	3.62293, 101.5771259	Alive	Malay	Citizen	Male	MALAYSIA	Single/Sporadic	Lab confirmed Positive	Passive	ELISA	5
642	2014_38	2014	73	BLOK L16 SG LEMAN, SEKINCHAN.		3.53279	101.088	3.5327929, 101.0881314	Alive	Malay	Citizen	Female	MALAYSIA	Single/Sporadic	Lab confirmed Positive	Passive	PCR	5
770	2014_166	2014	20	3 JLN CEMPERAI 2C/3 TMN RASA UTAMA BATANG KALI		3.48997	101.633	3.4899709, 101.632899	Alive	Malay	Citizen	Male	MALAYSIA	Single/Sporadic	Lab confirmed Positive	Passive	ELISA	5
773	2014_169	2014	19	PUSAT LATIHAN REJIMEN 502, ASKAR WATANIYAH SUNGAI TENGGI, HULU SELANGOR		3.71253	100.964	3.7125298, 100.9644956	Deceased	Malay	Citizen	Female	MALAYSIA	Cluster/Outbreak	Lab confirmed Positive	Passive	SEROLOGY	5
789	2014_185	2014	58	B-G-13A APT DAHLIA TAMAN BUNGA RAYA BUKIT BERUNTUNG		3.43799	101.551	3.4379889, 101.5508346	Alive	Malay	Citizen	Male	MALAYSIA	Single/Sporadic	Lab confirmed Positive	Passive	SEROLOGY	5
620	2014_16	2014	35	BLOCK E TINGKAT 6 NO 16 FLAT SRI PERANTAU PELABUHAN KLANG		3.05315	101.396	3.0531507, 101.3963012	Alive	Malay	Citizen	Male	MALAYSIA	Single/Sporadic	Lab confirmed Positive	Passive	MAT	5
648	2014_44	2014	67	NO 46 PT 6 TIMUR, SG BESAR		3.6754	100.986	3.675398, 100.9857899	Alive	Malay	Citizen	Male	MALAYSIA	Single/Sporadic	Lab confirmed Positive	Passive	MAT	5
666	2014_62	2014	68	LOT 1389/1 LORONG YATIMAN ,KAMPUNG ULU TERIS,SUNGAI PELEK,SEPANG		2.67588	101.664	2.675882, 101.6638223	Deceased	Malay	Citizen	Male	MALAYSIA	Single/Sporadic	Lab confirmed Positive	Passive	SEROLOGY	5
774	2014_170	2014	21	PUSAT LATIHAN REJIMEN 502, ASKAR WATANIYAH SUNGAI TENGGI, HULU SELANGOR		3.71253	100.964	3.7125298, 100.9644956	Alive	Malay	Citizen	Female	MALAYSIA	Cluster/Outbreak	Lab confirmed Positive	Passive	ELISA	5
772	2014_168	2014	18	PUSAT LATIHAN REJIMEN 502, ASKAR WATANIYAH SUNGAI TENGGI, HULU SELANGOR		3.71253	100.964	3.7125298, 100.9644956	Alive	Malay	Citizen	Female	MALAYSIA	Cluster/Outbreak	Lab confirmed Positive	Passive	ELISA	5
769	2014_165	2014	59	850, TAMAN WAWASAN, BATANG KALI		3.46635	101.651	3.466352, 101.650559	Alive	Indian	Citizen	Male	MALAYSIA	Single/Sporadic	Lab confirmed Positive	Passive	ELISA	5
784	2014_180	2014	18	K-1-7, APT. KENANGA, TMN BUNGARAYA, BUKIT BERUNTUNG, RAWANG.		3.42439	101.557	3.4243887, 101.5568671	Alive	Malay	Citizen	Male	MALAYSIA	Single/Sporadic	Lab confirmed Positive	Passive	SEROLOGY	5
638	2014_34	2014	19	A--4-10 PERSIARAN PUTRA PERMAI SELESA BANDAR PUTRA PERMAIO SERI KEMBANGAN		2.98346	101.667	2.9834648, 101.6665939	Alive	Foreigners	Non-citizen	Male	MYANMAR	Single/Sporadic	Lab confirmed Positive	Passive	SEROLOGY	5
678	2014_74	2014	15	LOT 1710 JLN SG TEKALI, BT 14 43100 HULU LANGAT SELANGOR		3.11274	101.828	3.1127368, 101.8275042	Alive	Malay	Citizen	Male	MALAYSIA	Single/Sporadic	Lab confirmed Positive	Passive	SEROLOGY	5
640	2014_36	2014	28	A2-04-05,BLOK A2,JALAN SB INDAH 5/1,PANGSAPURI KENARI,TAMAN SUNGAI BESI INDAH,SERI KEMBANGAN		3.02531	101.725	3.0253091, 101.7245544	Alive	Foreigners	Non-citizen	Male	PAKISTAN	Single/Sporadic	Lab confirmed Positive	Passive	SEROLOGY	5
732	2014_128	2014	30	GOLDEN EAGLE SERVICES G - 1A -PERDANA 6/6 TAMAN PANDAN PERDANA KL		3.11238	101.745	3.1123776, 101.7446889	Alive	Foreigners	Non-citizen	Male	ALGERIA	Single/Sporadic	Lab confirmed Positive	Passive	SEROLOGY	5
628	2014_24	2014	29	NO 60 JALAN 2 ,TAMAN SUBANG BARU ,40150 SHAH ALAM ,SELANGOR		3.1525	101.527	3.1525008, 101.5273731	Alive	Malay	Citizen	Male	MALAYSIA	Single/Sporadic	Lab confirmed Positive	Passive	SEROLOGY	5
730	2014_126	2014	27	NO 11 JLN MELUR 20, TMN MELUR AMPANG SELANGOR		3.11997	101.774	3.1199743, 101.7738134	Alive	Malay	Citizen	Male	MALAYSIA	Single/Sporadic	Lab confirmed Positive	Passive	SEROLOGY	5
721	2014_117	2014	76	NO 1192 KG TASIK 68000 AMPANG SEL		3.16648	101.748	3.16648, 101.7483451	Alive	Malay	Citizen	Male	MALAYSIA	Single/Sporadic	Lab confirmed Positive	Passive	SEROLOGY	5
757	2014_153	2014	17	NO 140, KAMPUNG SEJANTUNG, KALUMPANG		3.63871	101.573	3.638709, 101.5729639	Alive	Chinese	Citizen	Male	MALAYSIA	Single/Sporadic	Lab confirmed Positive	Passive	SEROLOGY	5
756	2014_152	2014	41	BLOK A-105 JALAN SERULING TAMAN SERULING Kuala Kubu Bharu, Selangor		3.57326	101.663	3.5732611, 101.6631232	Alive	Malay	Citizen	Male	MALAYSIA	Single/Sporadic	Lab confirmed Positive	Passive	SEROLOGY	5
771	2014_167	2014	22	PUSAT LATIHAN REJIMEN 502, ASKAR WATANIYAH SUNGAI TENGGI, HULU SELANGOR		3.71253	100.964	3.7125298, 100.9644956	Alive	Malay	Citizen	Female	MALAYSIA	Cluster/Outbreak	Lab confirmed Positive	Active	ELISA	5
766	2014_162	2014	33	NO. 3, JALAN MERANTI 3A/19, BANDAR BARU, BATANG KALI.		3.459	101.652	3.4589961, 101.6523373	Alive	Indian	Citizen	Male	MALAYSIA	Single/Sporadic	Lab confirmed Positive	Passive	SEROLOGY	5
777	2014_173	2014	36	NO. 74, KG TOK PINANG, SERENDAH.		3.37022	101.604	3.37022, 101.6036905	Alive	Indian	Citizen	Male	MALAYSIA	Single/Sporadic	Lab confirmed Positive	Passive	ELISA	5
783	2014_179	2014	16	SRD-1-3-A PANGSAPURI ROS 1, SEK BS 5,BKT SENTOSA		3.39846	101.568	3.398464, 101.5676399	Alive	Malay	Citizen	Female	MALAYSIA	Single/Sporadic	Lab confirmed Positive	Passive	SEROLOGY	5
608	2014_4	2014	1	LOT 21470,KG SERI INDAH A, LORONG 4 SG BULOH		3.21569	101.518	3.2156879, 101.5181222	Alive	Malay	Citizen	Female	MALAYSIA	Single/Sporadic	Lab confirmed Positive	Passive	PCR	6
754	2014_150	2014	43	NO 6, JALAN HANG LEKIR RUMAH AWAM PADANG GOLF KKB		3.57053	101.646	3.5705266, 101.6460492	Alive	Malay	Citizen	Female	MALAYSIA	Single/Sporadic	Lab confirmed Positive	Passive	SEROLOGY	6
781	2014_177	2014	22	NO 23, TAMAN ANUGERAH SURIA, SG CHOH		3.36199	101.568	3.3619934, 101.5681492	Alive	Foreigners	Non-citizen	Male	NEPAL	Single/Sporadic	Lab confirmed Positive	Passive	SEROLOGY	6
731	2014_127	2014	59	NO 195 LORONG PINANG 2, JALAN PINANG ,KAMPUNG MELAYU, AMPANG		3.15215	101.762	3.1521511, 101.7623268	Alive	Malay	Citizen	Female	MALAYSIA	Single/Sporadic	Lab confirmed Positive	Passive	SEROLOGY	6
654	2014_50	2014	59	NO 5 JALAN HJ ABD KADIR, JALAN SULTAN KAMPUNG SG. TENGAR,		3.82276	100.882	3.8227583, 100.8818096	Alive	Malay	Citizen	Male	MALAYSIA	Single/Sporadic	Lab confirmed Positive	Passive	Rapid Test	6
684	2014_80	2014	15	PUSAT TAHFIZ HAYATUL ULOOM SUNGAI SEMUNGKIS, HULU LANGAT		3.13616	101.813	3.1361554, 101.812727	Alive	Malay	Citizen	Male	MALAYSIA	Cluster/Outbreak	Lab confirmed Positive	Active	MAT	6
685	2014_81	2014	11	PUSAT TAHFIZ HAYATUL ULOOM SUNGAI SEMUNGKIS, HULU LANGAT		3.13616	101.813	3.1361554, 101.812727	Alive	Malay	Citizen	Male	MALAYSIA	Cluster/Outbreak	Lab confirmed Positive	Active	MAT	6
686	2014_82	2014	13	PUSAT TAHFIZ HAYATUL ULOOM SUNGAI SEMUNGKIS, HULU LANGAT		3.13616	101.813	3.1361554, 101.812727	Alive	Malay	Citizen	Male	MALAYSIA	Cluster/Outbreak	Lab confirmed Positive	Active	MAT	6
687	2014_83	2014	13	PUSAT TAHFIZ HAYATUL ULOOM SUNGAI SEMUNGKIS, HULU LANGAT		3.13616	101.813	3.1361554, 101.812727	Alive	Malay	Citizen	Male	MALAYSIA	Cluster/Outbreak	Lab confirmed Positive	Active	MAT	6
688	2014_84	2014	13	PUSAT TAHFIZ HAYATUL ULOOM SUNGAI SEMUNGKIS, HULU LANGAT		3.13616	101.813	3.1361554, 101.812727	Alive	Malay	Citizen	Male	MALAYSIA	Cluster/Outbreak	Lab confirmed Positive	Active	MAT	6
689	2014_85	2014	9	PUSAT TAHFIZ HAYATUL ULOOM SUNGAI SEMUNGKIS, HULU LANGAT		3.13616	101.813	3.1361554, 101.812727	Alive	Malay	Citizen	Male	MALAYSIA	Cluster/Outbreak	Lab confirmed Positive	Active	MAT	6
690	2014_86	2014	14	PUSAT TAHFIZ HAYATUL ULOOM SUNGA SEMUNGKIS, HULU LANGAT		3.13616	101.813	3.1361554, 101.812727	Alive	Malay	Citizen	Male	MALAYSIA	Cluster/Outbreak	Lab confirmed Positive	Active	MAT	6
691	2014_87	2014	13	PUSAT TAHFIZ HAYATUL ULOOM SUNGAI SEMUNGKIS, HULU LANGAT		3.13616	101.813	3.1361554, 101.812727	Alive	Malay	Citizen	Male	MALAYSIA	Cluster/Outbreak	Lab confirmed Positive	Active	MAT	6
692	2014_88	2014	14	PUSAT TAHFIZ HAYATUL ULOOM SUNGAI SEMUNGKIS, HULU LANGAT		3.13616	101.813	3.1361554, 101.812727	Alive	Malay	Citizen	Male	MALAYSIA	Cluster/Outbreak	Lab confirmed Positive	Active	MAT	6
693	2014_89	2014	15	PUSAT TAHFIZ HAYATUL ULOOM SUNGAI SEMUNGKIS, HULU LANGAT		3.13616	101.813	3.1361554, 101.812727	Alive	Malay	Citizen	Male	MALAYSIA	Cluster/Outbreak	Lab confirmed Positive	Active	MAT	6
694	2014_90	2014	15	PUSAT TAHFIZ HAYATUL ULOOM SUNGAI SEMUNGKIS, HULU LANGAT		3.13616	101.813	3.1361554, 101.812727	Alive	Malay	Citizen	Male	MALAYSIA	Cluster/Outbreak	Lab confirmed Positive	Active	MAT	6
695	2014_91	2014	18	PUSAT TAHFIZ HAYATUL ULOOM SUNGAI SEMUNGKIS, HULU LANGAT		3.13616	101.813	3.1361554, 101.812727	Alive	Malay	Citizen	Male	MALAYSIA	Cluster/Outbreak	Lab confirmed Positive	Active	MAT	6
696	2014_92	2014	14	PUSAT TAHFIZ HAYATUL ULOOM SUNGAI SEMUNGKIS, HULU LANGAT		3.13616	101.813	3.1361554, 101.812727	Alive	Malay	Citizen	Male	MALAYSIA	Cluster/Outbreak	Lab confirmed Positive	Active	MAT	6
697	2014_93	2014	13	PUSAT TAHFIZ HAYATUL ULOOM SUNGAI SEMUNGKIS, HULU LANGAT		3.13616	101.813	3.1361554, 101.812727	Alive	Malay	Citizen	Male	MALAYSIA	Cluster/Outbreak	Lab confirmed Positive	Active	MAT	6
698	2014_94	2014	24	PUSAT TAHFIZ HAYATUL ULOOM SUNGAI SEMUNGKIS, HULU LANGAT		3.13616	101.813	3.1361554, 101.812727	Alive	Malay	Citizen	Male	MALAYSIA	Cluster/Outbreak	Lab confirmed Positive	Active	MAT	6
765	2014_161	2014	17	LOT 169,KG ORANG ASLI HULU TAMU, BATANG KALI		3.46886	101.697	3.4688555, 101.6965114	Alive	Malay	Citizen	Male	MALAYSIA	Single/Sporadic	Lab confirmed Positive	Passive	SEROLOGY	6
723	2014_119	2014	32	A-1-9 TMN MULIA JAYA , 68000 AMPANG, SELANGOR.		3.13094	101.79	3.130935, 101.7897548	Alive	Foreigners	Non-citizen	Male	INDONESIA	Single/Sporadic	Lab confirmed Positive	Passive	SEROLOGY	6
622	2014_18	2014	3	17-3-11 BLOK 17 PNSPURI SRI NEVILLIA JALAN ANGGERIK 16400 NERVILLA 37/166 KOTA KEMUNING		2.9925	101.541	2.992505, 101.54146	Alive	Malay	Citizen	Female	MALAYSIA	Single/Sporadic	Lab confirmed Positive	Passive	ELISA	6
719	2014_115	2014	36	5130 P/PURI INTAN JLN BKT PERMAI TMN BKT PERMAI 56100 CHERAS KL		3.11136	101.759	3.1113553, 101.7588674	Alive	Malay	Citizen	Male	MALAYSIA	Single/Sporadic	Lab confirmed Positive	Passive	SEROLOGY	6
658	2014_54	2014	33	LOT 1134, JALAN BESAR NO. 4, KG. BAGAN LALANG		2.60593	101.698	2.6059258, 101.6982899	Alive	Foreigners	Non-citizen	Female	INDONESIA	Single/Sporadic	Lab confirmed Positive	Passive	SEROLOGY	6
788	2014_184	2014	21	D101 APARTMENT DAHLIA TMN BUNGA RAYA BKT BERUNTUNG , RAWANG SELANGOR		3.44077	101.552	3.44077, 101.551644	Alive	Malay	Citizen	Female	MALAYSIA	Single/Sporadic	Lab confirmed Positive	Passive	ELISA	6
750	2014_146	2014	39	NO 31 JALAN BERLIAN 5D TAMAN LEMBAH DAMAI KERLING		3.60058	101.614	3.6005844, 101.6136442	Alive	Malay	Citizen	Male	MALAYSIA	Single/Sporadic	Lab confirmed Positive	Passive	ELISA	7
655	2014_51	2014	20	8G-06- RUVENA VILLA PUTRA PERDANA PUCHONG		2.94109	101.608	2.9410878, 101.6077252	Alive	Indian	Citizen	Male	MALAYSIA	Single/Sporadic	Lab confirmed Positive	Passive	MAT	7
785	2014_181	2014	33	B-1-26 APARTMENT TERATAI TMN BUNGA RAYA, BUKIT BERUNTUNG		3.42439	101.557	3.4243887, 101.5568671	Alive	Malay	Citizen	Male	MALAYSIA	Single/Sporadic	Lab confirmed Positive	Passive	ELISA	7
712	2014_108	2014	52	NO 7 JLN RESAK 6 TAMAN IMPIAN EHSAN BALAKONG 43300 SERI KEMBANGAN SEL		3.01654	101.755	3.0165357, 101.7547525	Deceased	Foreigners	Non-citizen	Male	INDONESIA	Single/Sporadic	Lab confirmed Positive	Passive	SEROLOGY	7
646	2014_42	2014	21	KG. PARIT BARU, SABAK BERNAM		3.7696	100.984	3.769601, 100.9836551	Alive	Malay	Citizen	Male	MALAYSIA	Single/Sporadic	Lab confirmed Positive	Passive	SEROLOGY	7
663	2014_59	2014	67	NO 24, KM 26 JENDERAM HILIR DENGKIL 016-2324077 ANAK NORHAFIZA		2.88494	101.723	2.884939, 101.723171	Alive	Malay	Citizen	Male	MALAYSIA	Single/Sporadic	Lab confirmed Positive	Passive	SEROLOGY	7
780	2014_176	2014	10	NO 7 JALAN CEMPAKA 5 TAMAN CEMPAKA SERENDAH 48200 SELANGOR		3.36963	101.612	3.3696325, 101.6119746	Alive	Chinese	Citizen	Female	MALAYSIA	Single/Sporadic	Lab confirmed Positive	Passive	ELISA	7
702	2014_98	2014	12	PUSAT DARUL HUFFAZ HEAD QUARTERS, NO.11, JALAN PUTRA 4, TAMAN PUTRA KAJANG, 43000 KAJANG		2.97828	101.773	2.9782817, 101.772545	Alive	Malay	Citizen	Male	MALAYSIA	Cluster/Outbreak	Lab confirmed Positive	Active	MAT	7
703	2014_99	2014	15	PUSAT DARUL HUFFAZ HEAD QUARTERS, NO.11, JALAN PUTRA 4, TAMAN PUTRA KAJANG, 43000 KAJANG		2.97828	101.773	2.9782817, 101.772545	Alive	Malay	Citizen	Male	MALAYSIA	Cluster/Outbreak	Lab confirmed Positive	Active	MAT	7
704	2014_100	2014	16	PUSAT DARUL HUFFAZ HEAD QUARTERS, NO.11, JALAN PUTRA 4, TAMAN PUTRA KAJANG, 43000 KAJANG		2.97828	101.773	2.9782817, 101.772545	Alive	Malay	Citizen	Male	MALAYSIA	Cluster/Outbreak	Lab confirmed Positive	Active	MAT	7
705	2014_101	2014	14	PUSAT DARUL HUFFAZ HEAD QUARTERS, NO.11, JALAN PUTRA 4, TAMAN PUTRA KAJANG, 43000 KAJANG		2.97828	101.773	2.9782817, 101.772545	Alive	Malay	Citizen	Male	MALAYSIA	Cluster/Outbreak	Lab confirmed Positive	Active	MAT	7
706	2014_102	2014	11	PUSAT DARUL HUFFAZ HEAD QUARTERS, NO.11, JALAN PUTRA 4, TAMAN PUTRA KAJANG, 43000 KAJANG		2.97828	101.773	2.9782817, 101.772545	Alive	Malay	Citizen	Male	MALAYSIA	Cluster/Outbreak	Lab confirmed Positive	Active	PCR	7
707	2014_103	2014	11	PUSAT DARUL HUFFAZ HEAD QUARTERS, NO.11, JALAN PUTRA 4, TAMAN PUTRA KAJANG, 43000 KAJANG		2.97828	101.773	2.9782817, 101.772545	Alive	Malay	Citizen	Male	MALAYSIA	Cluster/Outbreak	Lab confirmed Positive	Active	PCR	7
795	2014_191	2014	27	NO 19 JALAN RAMPAISARI 1E BANDAR SG BUAYA Rawang SELANGOR		3.37631	101.527	3.3763115, 101.5269838	Alive	Malay	Citizen	Female	MALAYSIA	Single/Sporadic	Lab confirmed Positive	Passive	ELISA	7
739	2014_135	2014	63	KAMPUNG BATU 3, JALAN BANGI 43500 SEMENYIH 03-87236086		2.90392	101.805	2.9039237, 101.8051956	Alive	Malay	Citizen	Female	MALAYSIA	Single/Sporadic	Lab confirmed Positive	Passive	SEROLOGY	7
762	2014_158	2014	59	91-2, KG RAHMAT BARU, FELDA GEDANGSA		3.73558	101.382	3.735583, 101.382296	Alive	Malay	Citizen	Female	MALAYSIA	Single/Sporadic	Lab confirmed Positive	Passive	ELISA	7
617	2014_13	2014	27	TAMAN PERINDUSTRIAN PULAU INDAH		2.96807	101.341	2.968071, 101.3408179	Alive	Foreigners	Non-citizen	Male	BANGLADESH	Single/Sporadic	Lab confirmed Positive	Passive	ELISA	7
711	2014_107	2014	31	BLOK A-3-0319 TAMAN CHERAS PRIMA		3.01309	101.766	3.013088, 101.766029	Alive	Foreigners	Non-citizen	Male	INDONESIA	Single/Sporadic	Lab confirmed Positive	Passive	SEROLOGY	7
752	2014_148	2014	70	7 LOT 18 KG DAGANG SETIA KUALA KUBU BHARU		3.55811	101.647	3.558106, 101.6471992	Alive	Malay	Citizen	Female	MALAYSIA	Single/Sporadic	Lab confirmed Positive	Passive	ELISA	7
625	2014_21	2014	70	LOT 973, BT 36, LORONG HAJI BAKRI, KAMPUNG KUNDANG PANTAI, TANJUNG SEPAT, 42800 BANTING, SELANGOR		2.67346	101.532	2.673462, 101.5324009	Alive	Malay	Citizen	Female	MALAYSIA	Single/Sporadic	Lab confirmed Positive	Passive	MAT	7
775	2014_171	2014	72	NO 75 KG KOSKAN , JLN SG BUAYA, SG CHOH. RAWANG		3.37021	101.547	3.370213, 101.5474082	Alive	Indian	Citizen	Male	MALAYSIA	Single/Sporadic	Lab confirmed Positive	Passive	ELISA	7
637	2014_33	2014	79	NO.7,JALAN NIPAH,KAMPUNG BARU,BATU 14,PUCHONG,		2.9915	101.626	2.9914954, 101.6262433	Alive	Malay	Citizen	Female	MALAYSIA	Single/Sporadic	Lab confirmed Positive	Passive	Rapid Test	8
634	2014_30	2014	21	0-1-1-5 PURI ROSANA VILLA , PUCHONG SELANGOR		2.93495	101.605	2.9349485, 101.6048361	Alive	Indian	Citizen	Female	MALAYSIA	Single/Sporadic	Lab confirmed Positive	Passive	SEROLOGY	8
767	2014_163	2014	52	NO 18 JALAN MERANTI 6B/3 SEK 3 BANDAR BARU BATANG KALI		3.45588	101.658	3.455884, 101.6583994	Alive	Malay	Citizen	Female	MALAYSIA	Single/Sporadic	Lab confirmed Positive	Passive	ELISA	8
607	2014_3	2014	19	B2-4-4 BANJARIA COURT JALAN BATU CAVES SELANGOR		3.23526	101.7	3.2352593, 101.6997139	Alive	Malay	Citizen	Male	MALAYSIA	Single/Sporadic	Lab confirmed Positive	Passive	SEROLOGY	8
710	2014_106	2014	34	D4-20 TMN ASA JAYA KAJANG		2.98689	101.817	2.986887, 101.816806	Alive	Foreigners	Non-citizen	Female	INDONESIA	Single/Sporadic	Lab confirmed Positive	Passive	SEROLOGY	8
660	2014_56	2014	16	W03-G-01 P'PURI VISTA ,VILLA PUTRA PERDANA,47100 PUCHONG		2.94559	101.608	2.945587, 101.608317	Alive	Chinese	Citizen	Female	MALAYSIA	Single/Sporadic	Lab confirmed Positive	Passive	SEROLOGY	8
792	2014_188	2014	37	19, JALAN TANJUNG 1, SEKSYEN BB 7, BUKIT BERUNTUNG RAWANG, 48000 RAWANG, SELANGOR		3.42111	101.566	3.4211079, 101.5664503	Alive	Malay	Citizen	Male	MALAYSIA	Single/Sporadic	Lab confirmed Positive	Passive	ELISA	8
748	2014_144	2014	32	JKR 1511/1 QUARTERS BALAI POLIS ULU YAM BHARU		3.42496	101.66	3.424962, 101.659725	Alive	Malay	Citizen	Male	MALAYSIA	Single/Sporadic	Lab confirmed Positive	Passive	ELISA	8
776	2014_172	2014	6	NO 3 JALAN DAHLIASARI 1 BANDAR SUNGAI BUAYA		3.37277	101.534	3.3727677, 101.5336493	Alive	Malay	Citizen	Male	MALAYSIA	Single/Sporadic	Lab confirmed Positive	Passive	ELISA	8
782	2014_178	2014	30	NO.57, JALAN ANGGERIK 3A/3, SEKSYEN BS9, BUKIT SENTOSA		3.39846	101.568	3.398464, 101.5676399	Alive	Malay	Citizen	Male	MALAYSIA	Single/Sporadic	Lab confirmed Positive	Passive	ELISA	8
779	2014_175	2014	33	2051 KG TRADISI SG CHOH RAWANG		3.34352	101.587	3.343516, 101.5873729	Alive	Malay	Citizen	Male	MALAYSIA	Single/Sporadic	Lab confirmed Positive	Passive	ELISA	8
647	2014_43	2014	28	KAMPUNG SEKENDI JALAN SUNGAI PULAI, SABAK BERNAM		3.72899	100.939	3.728987, 100.9386619	Alive	Malay	Citizen	Male	MALAYSIA	Single/Sporadic	Lab confirmed Positive	Passive	Rapid Test	8
618	2014_14	2014	29	A-8-33 BLOK MAWAR PERSIARAN BKT RAJA KLANG		3.08745	101.433	3.0874456, 101.4333364	Alive	Malay	Citizen	Male	MALAYSIA	Single/Sporadic	Lab confirmed Positive	Passive	ELISA	8
743	2014_139	2014	37	NO 14,KG KALONG HILIR ULU YAM BARU		3.44633	101.665	3.446326, 101.6648021	Alive	Malay	Citizen	Male	MALAYSIA	Single/Sporadic	Lab confirmed Positive	Passive	ELISA	9
683	2014_79	2014	37	NO 220 BT 21 KG BARU SG LUI 43100 HULU LANGAT SELANGOR		3.1629	101.887	3.1629009, 101.8867913	Deceased	Malay	Citizen	Female	MALAYSIA	Single/Sporadic	Lab confirmed Positive	Passive	SEROLOGY	9
616	2014_12	2014	22	KOSSAN LATEX JLN MERU, KLANG		3.11254	101.439	3.1125433, 101.43871	Alive	Foreigners	Non-citizen	Male	NEPAL	Single/Sporadic	Lab confirmed Positive	Passive	ELISA	9
649	2014_45	2014	48	LORONG HAJI ISMAIL, PARIT 5 BARAT, SUNGAI BESAR, SELANGOR		3.70425	100.993	3.7042484, 100.9933334	Alive	Malay	Citizen	Male	MALAYSIA	Single/Sporadic	Lab confirmed Positive	Passive	Rapid Test	9
669	2014_65	2014	42	LOT 1115, KG. BAGAN LALANG, SUNGAI PELEK		2.60593	101.698	2.6059258, 101.6982899	Alive	Malay	Citizen	Male	MALAYSIA	Single/Sporadic	Lab confirmed Positive	Passive	SEROLOGY	9
736	2014_132	2014	53	NO I9 TKT 1 BLOK B JLN MAWAR 17, TMN MUSTIKA 56100 KL		3.11343	101.756	3.1134313, 101.7562505	Alive	Foreigners	Non-citizen	Female	INDONESIA	Single/Sporadic	Lab confirmed Positive	Passive	SEROLOGY	9
670	2014_66	2014	19	7608,JALAN BESAR, KG. BATU 1, SEPANG		2.69137	101.751	2.691369, 101.7505271	Alive	Foreigners	Non-citizen	Female	MYANMAR	Single/Sporadic	Lab confirmed Positive	Passive	SEROLOGY	9
675	2014_71	2014	41	KAWASAN PEMBINAN RUMAH BANGLO JALAN JAMBATAN PUTUS,CYBERJAYA 3 016-9011825 SUPERVISIOR		2.92132	101.656	2.921318, 101.6559349	Alive	Foreigners	Non-citizen	Male	INDONESIA	Single/Sporadic	Lab confirmed Positive	Passive	SEROLOGY	9
609	2014_5	2014	21	LOT 46185/5, JALAN NENAS, TANAH GANTIAN, SG.TUA, BANDAR SELAYANG, BATU CAVES		3.26344	101.692	3.2634375, 101.6921875	Alive	Malay	Citizen	Male	MALAYSIA	Single/Sporadic	Lab confirmed Positive	Passive	SEROLOGY	9
751	2014_147	2014	35	NO 218, KG ASSAM KUMBANG, KKB		3.56579	101.665	3.5657897, 101.6650728	Alive	Chinese	Citizen	Male	MALAYSIA	Single/Sporadic	Lab confirmed Positive	Passive	SEROLOGY	9
613	2014_9	2014	46	LOT 396-5 KG TENGAH 3 BATU 6/14 GOMBAK		3.22958	101.714	3.2295782, 101.714315	Alive	Malay	Citizen	Male	MALAYSIA	Single/Sporadic	Lab confirmed Positive	Passive	SEROLOGY	10
627	2014_23	2014	32	NO 42 JALAN BSC 1A/7 , BANDAR SERI COALFIELDS, 47000 SUNGAI BULOH		3.24984	101.478	3.2498363, 101.4775194	Alive	Indian	Citizen	Male	MALAYSIA	Single/Sporadic	Lab confirmed Positive	Passive	SEROLOGY	10
645	2014_41	2014	79	BATU 23 SG NIBONG, SABAK BERNAM.		3.59357	101.056	3.5935718, 101.0561476	Alive	Malay	Citizen	Male	MALAYSIA	Single/Sporadic	Lab confirmed Positive	Passive	Rapid Test	10
673	2014_69	2014	20	NO. 43 TAMAN SRI SIANTAN, 43950 SUNGAI PELEK, SELANGOR		2.64366	101.72	2.6436573, 101.7203833	Alive	Indian	Citizen	Female	MALAYSIA	Single/Sporadic	Lab confirmed Positive	Passive	Rapid Test	10
717	2014_113	2014	69	LOT 1525, LORONG INDAH, KAMPUNG INDAH, LEMBAH JAYA, AMPANG		3.13923	101.782	3.1392298, 101.7818502	Alive	Malay	Citizen	Male	MALAYSIA	Single/Sporadic	Lab confirmed Positive	Passive	SEROLOGY	10
740	2014_136	2014	31	BATU 26, KG. ORANG ASLI BROGA, SEMENYIH		2.93669	101.911	2.93669, 101.9111479	Alive	Aborigins	Citizen	Male	MALAYSIA	Single/Sporadic	Lab confirmed Positive	Passive	Rapid Test	10
674	2014_70	2014	34	RUMAH KONGSI TAPAK BINA IOI CITY MALL (SEBELAH IOI RESORT)		2.97066	101.714	2.970663, 101.7136681	Deceased	Foreigners	Non-citizen	Male	INDONESIA	Single/Sporadic	Lab confirmed Positive	Passive	SEROLOGY	10
716	2014_112	2014	18	LOT 179 JLN IKAN JELAWAT TASIK CAMPURAN		3.13202	101.77	3.13202, 101.7695625	Alive	Malay	Citizen	Male	MALAYSIA	Single/Sporadic	Lab confirmed Positive	Passive	SEROLOGY	10
615	2014_11	2014	75	LOT 237 KG BUKIT BELAH , KLANG		3.08523	101.433	3.085228, 101.433248	Alive	Malay	Citizen	Male	MALAYSIA	Single/Sporadic	Lab confirmed Positive	Passive	ELISA	10
681	2014_77	2014	40	MCA 001 TAMAN PINGGIRAN DELIMA, HULU LANGAT		3.12261	101.81	3.122606, 101.8095491	Alive	Malay	Citizen	Male	MALAYSIA	Single/Sporadic	Lab confirmed Positive	Passive	SEROLOGY	10
745	2014_141	2014	20	8 JLN 48 DESA KELISA ULU YAM		3.42496	101.66	3.424962, 101.659725	Alive	Malay	Citizen	Male	MALAYSIA	Single/Sporadic	Lab confirmed Positive	Passive	SEROLOGY	10
738	2014_134	2014	37	NO 18 LRG B5, KAMPUNG PANDAN DALAM, 55100 KUALA LUMPUR.		3.14541	101.748	3.145409, 101.7483728	Deceased	Foreigners	Non-citizen	Female	INDONESIA	Single/Sporadic	Lab confirmed Positive	Passive	MAT	10
708	2014_104	2014	6	NO 137 JALAN SEKSYEN 3/13C, TAMAN KAJANG UTAMA		2.97252	101.801	2.9725249, 101.8013224	Alive	Malay	Citizen	Male	MALAYSIA	Single/Sporadic	Lab confirmed Positive	Passive	PCR	10
709	2014_105	2014	8	NO 137 JALAN SEKSYEN 3/13C, TAMAN KAJANG UTAMA		2.97252	101.801	2.9725249, 101.8013224	Alive	Malay	Citizen	Female	MALAYSIA	Single/Sporadic	Lab confirmed Positive	Passive	PCR	10
667	2014_63	2014	54	NO. 33, JLN SEROJA 14 ,TMN SEROJA, BDR BARU SALAK TINGGI,43900		2.82764	101.728	2.827638, 101.728475	Alive	Malay	Citizen	Male	MALAYSIA	Single/Sporadic	Lab confirmed Positive	Passive	SEROLOGY	10
718	2014_114	2014	5	NO 147 BLOK A TINGKAT 5 TMN MULIA JAYA AMPANG		3.13089	101.79	3.1308865, 101.7897021	Alive	Malay	Citizen	Female	MALAYSIA	Single/Sporadic	Lab confirmed Positive	Passive	Rapid Test	11
793	2014_189	2014	23	NO 17 , JALAN TERATAI ,BUKIT BERUNTUNG		3.42439	101.557	3.4243887, 101.5568671	Alive	Malay	Citizen	Male	MALAYSIA	Single/Sporadic	Lab confirmed Positive	Passive	SEROLOGY	11
741	2014_137	2014	47	NO 287 2 KG RAJA HALIM GEDANGSA		3.73861	101.381	3.738607, 101.3814059	Alive	Malay	Citizen	Female	MALAYSIA	Single/Sporadic	Lab confirmed Positive	Passive	SEROLOGY	11
630	2014_26	2014	46	106, JALAN BK 5B/1, BANDAR KINRARA, PUCHONG, SELANGOR.		3.03513	101.64	3.0351278, 101.639633	Alive	Malay	Citizen	Female	MALAYSIA	Single/Sporadic	Lab confirmed Positive	Passive	Rapid Test	11
671	2014_67	2014	12	LOT 1362, JLN. BALAI RAYA, KG. ULU CHUCHOH, SG. PELEK, SELANGOR		2.65911	101.677	2.6591128, 101.6766261	Alive	Malay	Citizen	Female	MALAYSIA	Single/Sporadic	Lab confirmed Positive	Passive	Rapid Test	11
768	2014_164	2014	44	NO 35 JALAN MERANTI6B/1BANDAR UTAMA BATANG KALI		3.45737	101.655	3.4573657, 101.6547487	Alive	Malay	Citizen	Female	MALAYSIA	Single/Sporadic	Lab confirmed Positive	Passive	ELISA	11
796	2014_192	2014	36	3 JLN KEMBOJA 4C/1 48300 RAWANG BUKIT SENTOSA		3.41149	101.595	3.4114887, 101.5949357	Alive	Malay	Citizen	Male	MALAYSIA	Single/Sporadic	Lab confirmed Positive	Passive	SEROLOGY	11
763	2014_159	2014	21	NO 20 KG ORG ASLI BTG KALI		3.46014	101.655	3.4601368, 101.6550138	Alive	Aborigins	Citizen	Male	MALAYSIA	Single/Sporadic	Lab confirmed Positive	Passive	SEROLOGY	11
656	2014_52	2014	28	NO.45 JLN AMANPUTRA 1/3, TMN AMANPUTRA,PUCHONG		2.93706	101.621	2.9370571, 101.6210936	Alive	Malay	Citizen	Male	MALAYSIA	Single/Sporadic	Lab confirmed Positive	Passive	SEROLOGY	12
677	2014_73	2014	11	CHALET CAHAYA QASEH, SUNGAI CONGKAK		3.2019	101.849	3.2018955, 101.8491459	Alive	Malay	Citizen	Female	MALAYSIA	Cluster/Outbreak	Lab confirmed Positive	Active	MAT	12
680	2014_76	2014	2	CHALET CAHAYA QASEH, SUNGAI CONGKAK		3.2019	101.849	3.2018955, 101.8491459	Alive	Malay	Citizen	Female	MALAYSIA	Cluster/Outbreak	Lab confirmed Positive	Active	MAT	12
626	2014_22	2014	32	NO.63,LOT 110,KG RTB BUKIT CHANGGANG,BANTING		2.80428	101.656	2.8042805, 101.6558278	Alive	Malay	Citizen	Male	MALAYSIA	Single/Sporadic	Lab confirmed Positive	Passive	SEROLOGY	12
715	2014_111	2014	2	NO 19, JALAN 4/9, KAMPUNG TASIK TAMBAHAN 68000 AMPANG, SELANGOR		3.12424	101.769	3.1242418, 101.7688466	Alive	Malay	Citizen	Female	MALAYSIA	Single/Sporadic	Lab confirmed Positive	Passive	SEROLOGY	12
747	2014_143	2014	15	NO 20 JLN AROWANA 8 TMN DESA ULU YAM BHARU		3.43776	101.659	3.437758, 101.6586815	Alive	Malay	Citizen	Male	MALAYSIA	Single/Sporadic	Lab confirmed Positive	Passive	SEROLOGY	12
661	2014_57	2014	10	NO. 73-02-G1 SPRING COURT 2 ,JLN LINGKARAN MAS, TMN MAS,47130 PUCHONG		2.93651	101.613	2.9365116, 101.6131916	Alive	Malay	Citizen	Female	MALAYSIA	Single/Sporadic	Lab confirmed Positive	Passive	SEROLOGY	12
742	2014_138	2014	32	KG ORG ASLI BATANG KALI		3.46014	101.655	3.4601368, 101.6550138	Alive	Aborigins	Citizen	Female	MALAYSIA	Single/Sporadic	Lab confirmed Positive	Passive	SEROLOGY	12
672	2014_68	2014	13	LOT 59, JALAN SUNGAI KEROH, TAMAN SERI SEPANG, SEPANG		2.68398	101.748	2.683977, 101.7478249	Alive	Indian	Citizen	Male	MALAYSIA	Single/Sporadic	Lab confirmed Positive	Passive	SEROLOGY	12
786	2014_182	2014	19	BLOK D-G-22 APT TERATAI TMN BUNGA RAYA BUKIT BERUNTUNG		3.42439	101.557	3.4243887, 101.5568671	Alive	Malay	Citizen	Male	MALAYSIA	Single/Sporadic	Lab confirmed Positive	Passive	SEROLOGY	12
700	2014_96	2014	10	PUSAT DARUL HUFFAZ HEAD QUARTERS NO 11, JALAN PUTRA 4 TAMAN PUTRA KAJANG, 43000 KAJANG		2.97828	101.773	2.9782817, 101.772545	Alive	Malay	Citizen	Male	MALAYSIA	Cluster/Outbreak	Lab confirmed Positive	Active	PCR	12
659	2014_55	2014	45	B3-8-1 CYBERIA SMARTHOMES, CYBERJAYA		2.92246	101.64	2.9224607, 101.6395879	Alive	Malay	Citizen	Female	MALAYSIA	Single/Sporadic	Lab confirmed Positive	Passive	SEROLOGY	12
701	2014_97	2014	42	12A, JALAN DESA MEWAH 17, DESA MEWAH, KAJANG		2.96157	101.845	2.9615733, 101.8449931	Alive	Malay	Citizen	Female	MALAYSIA	Single/Sporadic	Lab confirmed Positive	Passive	Rapid Test	12
665	2014_61	2014	8	NO.110, BLOK 5, TAMAN PERMATA DENGKIL		2.86266	101.682	2.862655, 101.6823481	Alive	Indian	Citizen	Female	MALAYSIA	Single/Sporadic	Lab confirmed Positive	Passive	SEROLOGY	12
664	2014_60	2014	7	LOT 156 A, KAMPUNG BATU 2 1/2, JALAN AIR HITAM, DENGKIL 012-2701359		2.88622	101.663	2.88622, 101.6626721	Alive	Malay	Citizen	Male	MALAYSIA	Single/Sporadic	Lab confirmed Positive	Passive	SEROLOGY	12
676	2014_72	2014	22	NO. 18, LOT E RISTA VILLA, TAMAN PUTRA PERDANA, PUCHONG		2.94605	101.608	2.946046, 101.6075961	Alive	Malay	Citizen	Male	MALAYSIA	Single/Sporadic	Lab confirmed Positive	Passive	Rapid Test	12
621	2014_17	2014	54	NO 47 JLN ARWAH 28 OFF JLN MERU, KLANG		3.04492	101.446	3.044917, 101.4455621	Alive	Foreigners	Non-citizen	Female	MYANMAR	Single/Sporadic	Lab confirmed Positive	Passive	ELISA	12
631	2014_27	2014	19	NO.411, TINGKAT 3, BLOK 41, FASA 3C, SEK.7, SHAH ALAM		3.04485	101.524	3.0448518, 101.5242703	Alive	Malay	Citizen	Male	MALAYSIA	Single/Sporadic	Lab confirmed Positive	Passive	SEROLOGY	12
632	2014_28	2014	48	NO. 26, JALAN PUTRA BAHAGIA 8/2L, PUTRA HEIGHT, SUBANG JAYA		2.99811	101.563	2.9981093, 101.5631813	Alive	Malay	Citizen	Female	MALAYSIA	Single/Sporadic	Lab confirmed Positive	Passive	SEROLOGY	12
847	2015_51	2015	4	NO. 15, JLN TAMING 2, TAMAN TAMING IMPIAN, 43000 KAJANG, SELANGOR		3.0195	101.733	3.0195028, 101.7330644	Alive	Malay	Citizen	Female	MALAYSIA	Single/Sporadic	Lab confirmed Positive	Passive	SEROLOGY	12
652	2014_48	2014	22	BATU 49 PARIT 9 SUNGAI LEMAN, SEKINCHAN.		3.56606	101.113	3.5660636, 101.1133974	Alive	Malay	Citizen	Male	MALAYSIA	Single/Sporadic	Lab confirmed Positive	Passive	SEROLOGY	1
755	2014_151	2014	26	22, Jln Seruling 14, 44000 Kuala Kubu Bharu, Selangor		3.5742	101.662	3.5741991, 101.6621985	Alive	Malay	Citizen	Male	MALAYSIA	Single/Sporadic	Lab confirmed Positive	Passive	SEROLOGY	1
835	2015_39	2015	45	BATU 22 1/2 KAMPUNG KUALA PANGASUN HULU LANGAT		3.2096	101.877	3.209598094, 101.8765662	Alive	Malay	Citizen	Male	MALAYSIA	Single/Sporadic	Lab confirmed Positive	Passive	SEROLOGY	1
802	2015_6	2015	17	NO 7 JLN MEMPARI 5, TMN MERU , KLANG		3.13179	101.444	3.1317927, 101.4440697	Alive	Indian	Citizen	Male	MALAYSIA	Single/Sporadic	Lab confirmed Positive	Passive	ELISA	1
855	2015_59	2015	50	M6-03-09 JLN PANDAN INDAH 6/8 PANDAN INDAH		3.13683	101.755	3.1368321, 101.7547616	Alive	Malay	Citizen	Male	MALAYSIA	Single/Sporadic	Lab confirmed Positive	Passive	SEROLOGY	1
804	2015_8	2015	9	NO 504 BLOK 72 SEK 24 , SHAH ALAM		3.03517	101.518	3.0351687, 101.5181014	Alive	Malay	Citizen	Male	MALAYSIA	Single/Sporadic	Lab confirmed Positive	Passive	ELISA	1
801	2015_5	2015	25	0-5-16 PPURI PALMA BDR BOTANIK, KLANG		2.98786	101.44	2.987855, 101.4400822	Alive	Malay	Citizen	Male	MALAYSIA	Single/Sporadic	Lab confirmed Positive	Passive	ELISA	1
825	2015_29	2015	54	NO. 7, KAMPUNG BARU LANJUT, SALAK, SEPANG, SELANGOR		2.79616	101.722	2.796161, 101.7222991	Alive	Malay	Citizen	Male	MALAYSIA	Single/Sporadic	Lab confirmed Positive	Passive	SEROLOGY	1
812	2015_16	2015	34	ASRAMA SYARIKAT HAYAT MAJU SDN.BHD. LOT 209, KG TOK KHALIFAH, PARIT 13 MUKIM SG. PANJANG		3.73563	101.066	3.7356325, 101.0655672	Alive	Foreigners	Non-citizen	Male	NEPAL	Single/Sporadic	Lab confirmed Positive	Passive	MAT	1
851	2015_55	2015	35	BLOK D-03-11 FLAT SRI NILAM AMPANG		3.13824	101.769	3.1382421, 101.7691478	Alive	Malay	Citizen	Female	MALAYSIA	Single/Sporadic	Lab confirmed Positive	Passive	SEROLOGY	1
811	2015_15	2015	84	KG. BAGAN NIRA SABAK BERNAM, 45200 SELANGOR		3.78918	100.993	3.7891783, 100.9934131	Alive	Malay	Citizen	Male	MALAYSIA	Single/Sporadic	Lab confirmed Positive	Passive	SEROLOGY	1
852	2015_56	2015	18	NO 649 LORONG 20 KAMPUNG TASEK PERMAI		3.12791	101.781	3.1279057, 101.7806033	Alive	Foreigners	Non-citizen	Male	MYANMAR	Single/Sporadic	Lab confirmed Positive	Passive	SEROLOGY	1
832	2015_36	2015	8	NO 5, JLN WAWASAN 1A, TMN WAWASAN,HULU LANGAT, SELANGOR		3.11843	101.81	3.1184265, 101.8102729	Deceased	Malay	Citizen	Male	MALAYSIA	Single/Sporadic	Lab confirmed Positive	Passive	Rapid Test	1
822	2015_26	2015	34	NO 46, JALAN 3, TAMAN MURNI, SEPANG		2.68568	101.748	2.6856763, 101.748465	Alive	Indian	Citizen	Female	MALAYSIA	Single/Sporadic	Lab confirmed Positive	Passive	SEROLOGY	1
858	2015_62	2015	17	NO 12 TGKT 1 JLN DAGANG 10 TMN DAGANG		3.1468	101.755	3.1467979, 101.7553616	Alive	Foreigners	Non-citizen	Male	NEPAL	Single/Sporadic	Lab confirmed Positive	Passive	SEROLOGY	2
818	2015_22	2015	29	KLINIK CURE N CARE, KOTA WARISAN		2.82422	101.696	2.824222, 101.6958172	Alive	Malay	Citizen	Male	MALAYSIA	Single/Sporadic	Lab confirmed Positive	Passive	SEROLOGY	2
834	2015_38	2015	59	NO 95 JALAN CEMPAKA 4, TAMAN DESA RAYA, HULU LANGAT		3.10137	101.803	3.1013652, 101.8026681	Alive	Malay	Citizen	Male	MALAYSIA	Single/Sporadic	Lab confirmed Positive	Passive	SEROLOGY	2
803	2015_7	2015	31	12, Jalan Kiai Khusairi 8, Taman Aneka Baru, 41100 Klang, Selangor		3.0494	101.423	3.0494004, 101.4234285	Alive	Malay	Citizen	Female	MALAYSIA	Single/Sporadic	Lab confirmed Positive	Passive	ELISA	2
823	2015_27	2015	35	RUMAH KONGSI BERDEKATAN IOI CITY MALL JALAN PUCHONG		2.97066	101.714	2.970663, 101.7136681	Alive	Foreigners	Non-citizen	Male	INDIA	Single/Sporadic	Lab confirmed Positive	Passive	SEROLOGY	2
829	2015_33	2015	42	LOT 314 LORONG 52B KPG CHERAS BARU 56100 KL		3.11526	101.753	3.1152564, 101.7528527	Alive	Malay	Citizen	Female	MALAYSIA	Single/Sporadic	Lab confirmed Positive	Passive	SEROLOGY	2
816	2015_20	2015	25	LOT 44 JALAN 16, TAMAN DESA AIR HITAM, 47100 PUCHONG		3.05515	101.639	3.0551468, 101.638754	Alive	Malay	Citizen	Male	MALAYSIA	Single/Sporadic	Lab confirmed Positive	Passive	SEROLOGY	3
826	2015_30	2015	19	BLOK 3-1-6 P/PURI INTAN TMN BKT PERMAI 56100 KL		3.12296	101.726	3.1229641, 101.7255891	Alive	Malay	Citizen	Male	MALAYSIA	Single/Sporadic	Lab confirmed Positive	Passive	SEROLOGY	3
798	2015_2	2015	21	14 JLN SU 36 TMN SELAYANG UTAMA		3.23508	101.642	3.235083, 101.6421222	Alive	Indian	Citizen	Female	MALAYSIA	Single/Sporadic	Lab confirmed Positive	Passive	SEROLOGY	3
874	2015_78	2015	36	C1 5 APT SRI SEROJA BB7 BUKIT BERUNTUNG		3.4217	101.572	3.4216984, 101.5721051	Alive	Malay	Citizen	Male	MALAYSIA	Single/Sporadic	Lab confirmed Positive	Passive	SEROLOGY	3
820	2015_24	2015	28	35 TAMAN KOTA WARISAN ,43900 SEPANG SELANGOR		2.82375	101.696	2.8237459, 101.6962146	Alive	Foreigners	Non-citizen	Male	CHINA	Single/Sporadic	Lab confirmed Positive	Passive	SEROLOGY	3
849	2015_53	2015	23	RUMAH KONGSI BERDEKATAN RUMAH ORANG TUA AMPANG,KAMPUNG BARU AMPANG 68000 AMPANG SELANGOR (SUDAH 4 TAHUN TINGGAL DISANA)		3.14249	101.765	3.1424949, 101.7648011	Alive	Foreigners	Non-citizen	Male	INDONESIA	Single/Sporadic	Lab confirmed Positive	Passive	SEROLOGY	3
854	2015_58	2015	24	NO 7 JALAN 1/1 PANDAN PERDANA 55100 KUALA LUMPUR		3.14946	101.744	3.1494606, 101.7443536	Alive	Malay	Citizen	Female	MALAYSIA	Single/Sporadic	Lab confirmed Positive	Passive	SEROLOGY	3
862	2015_66	2015	28	NO 3A-15, RUMAH PANGSA SAGA, JALAN SAGA 30, TAMAN SAGA, AMPANG		3.11433	101.772	3.1143339, 101.7716103	Deceased	Malay	Citizen	Male	MALAYSIA	Single/Sporadic	Lab confirmed Positive	Passive	SEROLOGY	3
819	2015_23	2015	68	C-1-13 APT MEGAH VILLA JLN WARISAN 1/6 TMN KOTA WARISAN 43900 SEPANG		2.82533	101.707	2.8253341, 101.7072048	Alive	Indian	Citizen	Female	MALAYSIA	Single/Sporadic	Lab confirmed Positive	Passive	SEROLOGY	3
859	2015_63	2015	1	178 JLN DESA AMPANG 1 TMN SRI AMPANG		3.14174	101.775	3.1417377, 101.7747592	Alive	Malay	Citizen	Female	MALAYSIA	Single/Sporadic	Lab confirmed Positive	Passive	SEROLOGY	3
853	2015_57	2015	59	NO 46 BLOK I TAMAN DATO AHMAD RAZALI		3.15675	101.752	3.156748, 101.7520628	Alive	Malay	Citizen	Female	MALAYSIA	Single/Sporadic	Lab confirmed Positive	Passive	SEROLOGY	3
868	2015_72	2015	22	IKBN PERETAK KUALA KUBU BHARU		3.54726	101.678	3.5472602, 101.6780548	Alive	Malay	Citizen	Male	MALAYSIA	Single/Sporadic	Lab confirmed Positive	Passive	SEROLOGY	3
840	2015_44	2015	20	ASRAMA KOLEJ UNIVERSITY ISLAM SELANGOR		2.89076	101.79	2.8907553, 101.789594	Alive	Malay	Citizen	Male	MALAYSIA	Single/Sporadic	Lab confirmed Positive	Passive	SEROLOGY	3
806	2015_10	2015	59	LOT 595,JALAN BESAR ,BUKIT LANCHONG,PUTRA HEIGHTS,40400 SHAH ALAM		2.9913	101.559	2.9912998, 101.5594209	Alive	Malay	Citizen	Male	MALAYSIA	Single/Sporadic	Lab confirmed Positive	Passive	SEROLOGY	4
831	2015_35	2015	75	NO.42 JAAN TAMING NDAH 2, TAMAN TAMING INDAH, CHERAS		3.03731	101.795	3.0373087, 101.7947783	Alive	Chinese	Citizen	Female	MALAYSIA	Single/Sporadic	Lab confirmed Positive	Passive	SEROLOGY	4
843	2015_47	2015	26	BLOK D-1-8 PANGSAPURI MELATI JALAN SRI PUTRA 3/8 BANDAR SRI PUTRA 0123668671		2.88712	101.783	2.8871178, 101.7831915	Alive	Malay	Citizen	Male	MALAYSIA	Single/Sporadic	Lab confirmed Positive	Passive	SEROLOGY	4
810	2015_14	2015	46	NO. D-7-14, BLOK DENAK, P'PURI SERI MUTIARA JLN PUTRA INDAH 9/1C, SS9 PUTRA HEIGHT		3.00581	101.578	3.005805, 101.5777559	Alive	Malay	Citizen	Male	MALAYSIA	Single/Sporadic	Lab confirmed Positive	Passive	SEROLOGY	4
827	2015_31	2015	54	59 JALAN BAHAGIA 22 TAMAN SRI BAHAGIA KUALA LUMPUR		3.06022	101.755	3.0602219, 101.7551666	Alive	Chinese	Citizen	Female	MALAYSIA	Single/Sporadic	Lab confirmed Positive	Passive	MAT	4
869	2015_73	2015	25	C/O KILANG ULU YAM BATANG KALI		3.42496	101.66	3.424962, 101.659725	Alive	Foreigners	Non-citizen	Male	NEPAL	Single/Sporadic	Lab confirmed Positive	Passive	SEROLOGY	4
844	2015_48	2015	53	39 JLN DAMAI PERDANA BANDAR DAMAI PERDANA CHERAS KUALA LUMPUR		3.04737	101.74	3.0473696, 101.7395581	Alive	Chinese	Citizen	Female	MALAYSIA	Single/Sporadic	Lab confirmed Positive	Passive	SEROLOGY	4
828	2015_32	2015	17	503 BLOK 4, JALAN 2/4 F , BANDAR BARU BANGI , 43650		2.94757	101.772	2.9475674, 101.7723336	Alive	Malay	Citizen	Male	MALAYSIA	Single/Sporadic	Lab confirmed Positive	Passive	SEROLOGY	5
866	2015_70	2015	24	SRA G-16 TMN ROS 2 BKT BERUNTUNG, RAWANG		3.42439	101.557	3.4243887, 101.5568671	Alive	Malay	Citizen	Male	MALAYSIA	Single/Sporadic	Lab confirmed Positive	Passive	SEROLOGY	5
870	2015_74	2015	30	KG ASLI ULU TAMU BTG KALI		3.46886	101.697	3.4688555, 101.6965114	Alive	Aborigins	Citizen	Female	MALAYSIA	Single/Sporadic	Lab confirmed Positive	Passive	Rapid Test	5
850	2015_54	2015	46	BLOK 10 TINGKAT 4 NO 28 JALAN PANDAN MEWAH 68000 AMPANG SELANGOR		3.12659	101.763	3.1265913, 101.7632403	Alive	Foreigners	Non-citizen	Male	NEPAL	Single/Sporadic	Lab confirmed Positive	Passive	SEROLOGY	5
815	2015_19	2015	2	D-2-01 PPURI GOLDEN HEIGHT PINGGIRAN MAS 2 TMN MAS 43900 SEPANG, SELANGOR PRIMARY RESI NO 0126087308 OTHER RESI NO 0193508608		2.97329	101.58	2.9732863, 101.5795717	Alive	Malay	Citizen	Male	MALAYSIA	Single/Sporadic	Lab confirmed Positive	Passive	SEROLOGY	5
861	2015_65	2015	20	TAMAN KOMERSIAL PANDAN MEWAH 68000 AMPANG		3.13217	101.767	3.1321741, 101.7668495	Alive	Malay	Citizen	Male	MALAYSIA	Single/Sporadic	Lab confirmed Positive	Passive	SEROLOGY	5
871	2015_75	2015	14	NO 11 JLN MAHAGONI 2A/4 BTG KALI		3.45944	101.662	3.4594366, 101.661901	Alive	Malay	Citizen	Male	MALAYSIA	Single/Sporadic	Lab confirmed Positive	Passive	SEROLOGY	5
857	2015_61	2015	53	NO 112 BLOK M SUN RISE PARK LORONG 3 KG BARU AMPANG		3.13862	101.763	3.138623, 101.76264	Alive	Malay	Citizen	Male	MALAYSIA	Single/Sporadic	Lab confirmed Positive	Passive	SEROLOGY	5
836	2015_40	2015	27	NO 21 JALAN ZAMRUD 5 TAMAN SRI NANDING		3.10414	101.809	3.1041427, 101.808903	Alive	Malay	Citizen	Male	MALAYSIA	Single/Sporadic	Lab confirmed Positive	Passive	SEROLOGY	5
864	2015_68	2015	27	NO 52A,TAMAN DESA MEWAH, JALAN DESA MEWAH 12 SELANGOR		2.96343	101.844	2.963426, 101.8436912	Alive	Indian	Citizen	Female	MALAYSIA	Single/Sporadic	Lab confirmed Positive	Passive	Rapid Test	6
867	2015_71	2015	33	NO 31 JLN 2 TAMAN SRI BATANG KALI		3.46239	101.648	3.4623943, 101.6484579	Alive	Malay	Citizen	Male	MALAYSIA	Single/Sporadic	Lab confirmed Positive	Passive	SEROLOGY	6
837	2015_41	2015	21	NO 19 JLN NILAM 4 TMN SRI NANDING HULU LANGAT		3.09959	101.805	3.0995945, 101.8046494	Alive	Malay	Citizen	Male	MALAYSIA	Single/Sporadic	Lab confirmed Positive	Passive	SEROLOGY	6
872	2015_76	2015	37	NO.45 JLN JEJARUM 2 BUKIT SENTOSA		3.40229	101.572	3.4022909, 101.5720887	Alive	Malay	Citizen	Male	MALAYSIA	Single/Sporadic	Lab confirmed Positive	Passive	SEROLOGY	6
799	2015_3	2015	36	NO 3 JALAN HIJAU 11/2, BANDAR TASIK PUTERI RAWANG SELANGOR		3.28033	101.469	3.2803318, 101.46893	Alive	Malay	Citizen	Male	MALAYSIA	Single/Sporadic	Lab confirmed Positive	Passive	PCR	6
848	2015_52	2015	28	NO 12 JALAN 14/1D TAMAN CHERAS JAYA FASA 5 , CHERAS		3.02122	101.761	3.021224, 101.7605775	Alive	Indian	Citizen	Male	MALAYSIA	Single/Sporadic	Lab confirmed Positive	Active	SEROLOGY	6
817	2015_21	2015	5	NO 13 JALAN NUSAPUTRA 4/1C PRESINT 2 BANDAR NUSAPUTRA PUCHONG		2.936	101.61	2.935998, 101.609711	Alive	Malay	Citizen	Male	MALAYSIA	Single/Sporadic	Lab confirmed Positive	Passive	SEROLOGY	6
805	2015_9	2015	7	NO 1 JLN FATWA U2/46 TTDI JAYA SHAH ALAM		3.09692	101.552	3.0969237, 101.5518154	Alive	Malay	Citizen	Male	MALAYSIA	Single/Sporadic	Lab confirmed Positive	Passive	SEROLOGY	6
845	2015_49	2015	56	D-07-3A KONDOMINIUM MONTE BAYU, KG CHERAS BARU.		3.10756	101.755	3.1075626, 101.7547668	Alive	Malay	Citizen	Male	MALAYSIA	Single/Sporadic	Lab confirmed Positive	Passive	SEROLOGY	7
865	2015_69	2015	16	6 JLN KEKWA 11 TMN SERENDAH MAKMUR SERENDAH		3.39026	101.625	3.3902613, 101.6253487	Alive	Malay	Citizen	Male	MALAYSIA	Single/Sporadic	Lab confirmed Positive	Passive	SEROLOGY	7
856	2015_60	2015	20	LOT 1767 KG AMPANG INDAH		3.1491	101.762	3.149099, 101.7624521	Alive	Malay	Citizen	Male	MALAYSIA	Single/Sporadic	Lab confirmed Positive	Passive	SEROLOGY	7
808	2015_12	2015	62	NO 11, JALAN BUNGA KEKWA 2/12, SEKSYEN 2		3.06934	101.509	3.0693446, 101.5090858	Alive	Malay	Citizen	Male	MALAYSIA	Single/Sporadic	Lab confirmed Positive	Passive	MAT	7
860	2015_64	2015	2	A16-9, KUARTERS HOSPITAL AMPANG, 68000 AMPANG SELANGOR.		3.12834	101.763	3.128339, 101.7634717	Alive	Malay	Citizen	Male	MALAYSIA	Single/Sporadic	Lab confirmed Positive	Passive	SEROLOGY	7
841	2015_45	2015	35	NO.33 JALAN 3/64 43650 BANDAR BARU BANGI SELANGOR 0196626366		2.93812	101.776	2.9381197, 101.7762779	Alive	Malay	Citizen	Male	MALAYSIA	Single/Sporadic	Lab confirmed Positive	Passive	SEROLOGY	7
821	2015_25	2015	25	JABATAN IMEGRESEN MALAYSIA NEGERI SELANGOR,JLN PEKELILING 4,KLIA SEPANG,43900 SEPANG 0387766867		2.74175	101.702	2.7417476, 101.7015569	Deceased	Foreigners	Non-citizen	Male	MYANMAR	Single/Sporadic	Lab confirmed Positive	Passive	SEROLOGY	8
873	2015_77	2015	18	NO 25 JLN 10/F DESA MELUR SERENDAH		3.36301	101.627	3.363008, 101.6267591	Alive	Malay	Citizen	Female	MALAYSIA	Single/Sporadic	Lab confirmed Positive	Passive	SEROLOGY	8
839	2015_43	2015	4	25 JLN 6/5B ,SEKSYEN 6,PUNCAK BANGI,BANDAR BARU BANGI 0178859202 AYAH		2.95851	101.762	2.9585141, 101.7618071	Alive	Malay	Citizen	Female	MALAYSIA	Single/Sporadic	Lab confirmed Positive	Passive	SEROLOGY	8
842	2015_46	2015	29	A 211, PANGSAPURI SERI MAWAR, BANDAR SERI PUTERA, KAJANG,SELANGOR		2.89017	101.777	2.8901707, 101.7771737	Alive	Malay	Citizen	Female	MALAYSIA	Single/Sporadic	Lab confirmed Positive	Passive	Rapid Test	8
830	2015_34	2015	12	B3-116 ,PPURI INANG,TMN IMPIAN EHSAN,BALAKONG,SERI KEMBANGAN,		3.01147	101.755	3.0114674, 101.7548088	Alive	Malay	Citizen	Male	MALAYSIA	Single/Sporadic	Lab confirmed Positive	Passive	SEROLOGY	8
846	2015_50	2015	22	62-03A JALAN JUARA 1/6 TAMAN JUARA JAYA BALAKONG		3.03815	101.731	3.0381493, 101.7307003	Alive	Malay	Citizen	Female	MALAYSIA	Single/Sporadic	Lab confirmed Positive	Passive	SEROLOGY	8
863	2015_67	2015	32	NO 22 JALAN BJ/1 TAMAN BAIDURI JAYA BDR TEKNOLOGI KAJANG SEK.2 SEMENYIH		2.96228	101.827	2.9622782, 101.8267115	Alive	Indian	Citizen	Male	MALAYSIA	Single/Sporadic	Lab confirmed Positive	Passive	SEROLOGY	8
833	2015_37	2015	45	M5-G-03 TAMAN PERKASA JALAN 2/10, HULU LANGAT		3.101	101.797	3.1009977, 101.7974061	Alive	Malay	Citizen	Female	MALAYSIA	Single/Sporadic	Lab confirmed Positive	Passive	SEROLOGY	8
813	2015_17	2015	40	NO 41A, KUARTERS Ladang Sepang (Sime Darby Plantation Sdn Bhd		2.70353	101.744	2.7035253, 101.7438203	Alive	Foreigners	Non-citizen	Male	INDONESIA	Single/Sporadic	Lab confirmed Positive	Passive	SEROLOGY	9
809	2015_13	2015	1	NO 12 JLN PUJ 2/19C ,TMN PUNCAK JALIL,SERI KEMBANGAN,43300 SELANGOR 01112201530		3.01561	101.68	3.0156105, 101.680448	Alive	Malay	Citizen	Female	MALAYSIA	Single/Sporadic	Lab confirmed Positive	Passive	SEROLOGY	9
824	2015_28	2015	62	NO 59 JALAN VISTA 2/6, DESA VISTA BANDAR BARU SALAK TINGGI, SEPANG		2.83916	101.749	2.8391638, 101.749279	Alive	Malay	Citizen	Male	MALAYSIA	Single/Sporadic	Lab confirmed Positive	Passive	SEROLOGY	9
838	2015_42	2015	22	BATU 19 1/2 KG LUBUK KELUBI 43100 HULU LANGAT		3.11164	101.813	3.111642, 101.8131599	Alive	Malay	Citizen	Male	MALAYSIA	Single/Sporadic	Lab confirmed Positive	Passive	SEROLOGY	9
800	2015_4	2015	15	SH-3C-BILIK NO. 2, UIA JUNCTION 5A, SHEIKH AL-HUMAID, GOMBAK		3.24843	101.733	3.2484294, 101.7326136	Alive	Malay	Citizen	Female	MALAYSIA	Single/Sporadic	Lab confirmed Positive	Passive	Rapid Test	9
814	2015_18	2015	25	36A DESA PUTRA JALAN HAJI HANAFI SUNGAI MERAB 43000 KAJANG		2.91345	101.724	2.9134484, 101.7242035	Alive	Malay	Citizen	Male	MALAYSIA	Single/Sporadic	Lab confirmed Positive	Passive	SEROLOGY	9
797	2015_1	2015	36	NO 41, GARDEN TERRACE, JALAN VILLAMAS SIERRAMAS WEST, SELANGOR SIERRAMAS WEST 47000 SUNGAI BULOH SELANGOR		3.20855	101.579	3.2085536, 101.5793932	Alive	Chinese	Citizen	Male	MALAYSIA	Single/Sporadic	Lab confirmed Positive	Passive	PCR	12
807	2015_11	2015	52	NO 46 JALAN RAYA 7, SERDANG JAYA, 43300, SERI KEMBANGAN, SELANGOR		3.01085	101.704	3.0108546, 101.7040768	Alive	Malay	Citizen	Female	MALAYSIA	Single/Sporadic	Lab confirmed Positive	Passive	Rapid Test	12
897	2016_23	2015	8	LOT 751, JLN. NANGKA, KG. TG. MAS BATU 2, SEPANG		2.65579	101.739	2.6557889, 101.7389808	Alive	Malay	Citizen	Male	MALAYSIA	Single/Sporadic	Lab confirmed Positive	Passive	Rapid Test	12
940	2016_66	2016	7	NO 45 JALAN 3A/1 TAMAN SEROJA BUKIT SENTOSA		3.39846	101.568	3.398464, 101.5676399	Alive	Malay	Citizen	Female	MALAYSIA	Single/Sporadic	Lab confirmed Positive	Passive	SEROLOGY	1
887	2016_13	2016	33	NO 187, JLN UP 3/1, TMN UKAY PERDANA, AMPANG, SELANGOR		3.21051	101.777	3.2105062, 101.7768596	Alive	Malay	Citizen	Male	MALAYSIA	Single/Sporadic	Lab confirmed Positive	Passive	SEROLOGY	1
938	2016_64	2016	58	NO 106 JALAN TAMAN ARIF KUALA KUBU BHARU		3.56093	101.659	3.560932, 101.658546	Alive	Malay	Citizen	Male	MALAYSIA	Single/Sporadic	Lab confirmed Positive	Passive	SEROLOGY	1
937	2016_63	2016	5	NO 33JALAN MERANTI 3A/2 BATANG KALI		3.45903	101.653	3.4590305, 101.6528585	Alive	Indian	Citizen	Male	MALAYSIA	Single/Sporadic	Lab confirmed Positive	Passive	SEROLOGY	1
885	2016_11	2016	59	NO.25L, BATU 6 3/4, JALAN GOMBAK		3.20213	101.702	3.2021318, 101.7021121	Alive	Malay	Citizen	Male	MALAYSIA	Single/Sporadic	Lab confirmed Positive	Passive	SEROLOGY	1
931	2016_57	2016	67	NO.19A, LORONG RAYA 9(B9), KAMPUNG PANDAN DALAM		3.14152	101.744	3.1415189, 101.7443928	Alive	Malay	Citizen	Female	MALAYSIA	Single/Sporadic	Lab confirmed Positive	Passive	SEROLOGY	1
929	2016_55	2016	27	NO 21 JALAN WATAN 1 TMN SRI WATAN 1 AMPANG		3.13959	101.775	3.1395928, 101.77498	Alive	Malay	Citizen	Male	MALAYSIA	Single/Sporadic	Lab confirmed Positive	Passive	SEROLOGY	1
930	2016_56	2016	8	NO 74 TKT 4 BLOK A JLN BUNGA CEMPAKA 2 TMN MUDA AMPANG SELANGOR		3.11947	101.754	3.1194726, 101.7542059	Alive	Malay	Citizen	Female	MALAYSIA	Single/Sporadic	Lab confirmed Positive	Passive	SEROLOGY	1
893	2016_19	2016	30	D-18-05, CASA TIARA APT S16, SUBANG JAYA, SELANGOR.		3.08271	101.59	3.0827136, 101.5903611	Alive	Foreigners	Non-citizen	Male	INDIA	Single/Sporadic	Lab confirmed Positive	Passive	SEROLOGY	1
875	2016_1	2016	4	B-9-5 KUARTERS INTEGRASI HOSPITAL SG.BULOH		3.20933	101.561	3.20933, 101.5613392	Alive	Malay	Citizen	Female	MALAYSIA	Single/Sporadic	Lab confirmed Positive	Passive	SEROLOGY	2
921	2016_47	2016	26	ASRAMA KILANG MEDIA CONVERSE CHERAS BALAKONG		3.10684	101.726	3.1068447, 101.7259197	Alive	Chinese	Citizen	Male	MALAYSIA	Single/Sporadic	Lab confirmed Positive	Passive	Rapid Test	3
919	2016_45	2016	13	NO 12 JALAN 7/2D SEKSYEN 7 BANDAR BARU BANGI		2.96832	101.776	2.968318, 101.7760833	Alive	Malay	Citizen	Female	MALAYSIA	Single/Sporadic	Lab confirmed Positive	Passive	SEROLOGY	3
920	2016_46	2016	12	NO 4 JALAN 6/6C,BANGI LAKEHILL VILLA,SEKSYEN 6,BANDAR BARU BANGI 012-2021072		2.96073	101.763	2.9607257, 101.7626878	Alive	Malay	Citizen	Male	MALAYSIA	Single/Sporadic	Lab confirmed Positive	Active	MAT	3
918	2016_44	2016	25	2-4-8, KELOMPOK SRI WIDURI, JALAN 7/4, SEKSYEN 7, BANDAR BARU BANGI		2.97106	101.78	2.9710625, 101.7804877	Alive	Malay	Citizen	Female	MALAYSIA	Single/Sporadic	Lab confirmed Positive	Passive	SEROLOGY	3
907	2016_33	2016	14	NO 30 JLN 7/3G SEKSYEN 7 BANDAR BARU BANGI		2.96996	101.779	2.9699597, 101.7792223	Alive	Malay	Citizen	Male	MALAYSIA	Single/Sporadic	Lab confirmed Positive	Passive	SEROLOGY	3
913	2016_39	2016	48	NO.10,JALAN 4/7N,BANDAR BARU BANGI 43650 KAJANG		2.95573	101.781	2.9557344, 101.7812797	Alive	Malay	Citizen	Male	MALAYSIA	Single/Sporadic	Lab confirmed Positive	Passive	SEROLOGY	3
925	2016_51	2016	33	L1-03-07JALAN PENGHULU SEKSYEN 2 BANDAR MAHKOTA CHERAS		3.06039	101.785	3.0603878, 101.7852266	Alive	Malay	Citizen	Female	MALAYSIA	Single/Sporadic	Lab confirmed Positive	Passive	SEROLOGY	3
926	2016_52	2016	56	NO 29 JALAN SUADAMAI 6/2 BANDAR TUN HUSSEIN ONN BATU 9 CHERAS		3.04722	101.755	3.0472153, 101.7549935	Alive	Malay	Citizen	Female	MALAYSIA	Single/Sporadic	Lab confirmed Positive	Passive	SEROLOGY	3
936	2016_62	2016	7	NO 1/13, APARTMENT SEMARAK, BUKIT BERUNTUNG		3.41463	101.565	3.414632, 101.564818	Alive	Malay	Citizen	Female	MALAYSIA	Single/Sporadic	Lab confirmed Positive	Passive	MAT	3
894	2016_20	2016	65	NO 6 BLOK 3, SEK.16 FLAT PKNS SHAH ALAM		3.04786	101.523	3.0478556, 101.5234475	Alive	Malay	Citizen	Female	MALAYSIA	Single/Sporadic	Lab confirmed Positive	Passive	SEROLOGY	4
910	2016_36	2016	19	ASRAMA KOLEJ TINGGI MARA, BERANANG,SELANGOR		2.90368	101.867	2.9036803, 101.867055	Alive	Malay	Citizen	Male	MALAYSIA	Single/Sporadic	Lab confirmed Positive	Passive	SEROLOGY	4
923	2016_49	2016	20	NO 10 JALAN 14/1A TAMAN CHERAS JAYA BATU 9 CHERAS		3.02122	101.76	3.0212234, 101.7596802	Alive	Chinese	Citizen	Female	MALAYSIA	Single/Sporadic	Lab confirmed Positive	Passive	Rapid Test	4
922	2016_48	2016	27	NO 26 JALAN 12 TMN BALAKONG JAYA CHERAS		3.05853	101.76	3.0585322, 101.7602913	Alive	Indian	Citizen	Female	MALAYSIA	Single/Sporadic	Lab confirmed Positive	Passive	SEROLOGY	4
882	2016_8	2016	64	NO 13 JLN 7/8 TMN DESA SEK. 7 BANDAR COUNTRY HOME RAWANG		3.28101	101.477	3.2810088, 101.4773751	Deceased	Malay	Citizen	Female	MALAYSIA	Single/Sporadic	Lab confirmed Positive	Passive	Rapid Test	4
891	2016_17	2016	51	NO 190,JALAN PERIGI NENAS 8/MS,TAMAN PULAU INDAH,KLANG		2.93054	101.307	2.930536, 101.3069369	Alive	Foreigners	Non-citizen	Male	BANGLADESH	Single/Sporadic	Lab confirmed Positive	Passive	ELISA	4
903	2016_29	2016	20	NO 55 BATU 27 KAMPUNG JENDERAM HULU		2.84723	101.738	2.847232, 101.7383422	Alive	Malay	Citizen	Male	MALAYSIA	Single/Sporadic	Lab confirmed Positive	Passive	MAT	5
896	2016_22	2016	19	27-B JLN PUTRA PERDANA 5F, TAMAN PUTRA PERDANA, PUCHONG		2.94163	101.613	2.9416318, 101.6134283	Alive	Malay	Citizen	Female	MALAYSIA	Cluster/Outbreak	Lab confirmed Positive	Passive	SEROLOGY	5
901	2016_27	2016	31	27-B JLN PUTRA PERDANA 5F, TAMAN PUTRA PERDANA, PUCHONG		2.94163	101.613	2.9416318, 101.6134283	Alive	Malay	Citizen	Female	MALAYSIA	Cluster/Outbreak	Lab confirmed Positive	Passive	SEROLOGY	5
902	2016_28	2016	31	27-B JLN PUTRA PERDANA 5F, TAMAN PUTRA PERDANA, PUCHONG		2.94163	101.613	2.9416318, 101.6134283	Alive	Malay	Citizen	Male	MALAYSIA	Cluster/Outbreak	Lab confirmed Positive	Passive	SEROLOGY	5
900	2016_26	2016	26	LOT 2730C,JALAN RANGKAYO SUTAN,KAMPUNG SUNGAI MERAB LUAR 43300 KAJANG		2.93778	101.745	2.937777, 101.744941	Alive	Malay	Citizen	Male	MALAYSIA	Single/Sporadic	Lab confirmed Positive	Passive	SEROLOGY	5
928	2016_54	2016	23	BLOK 3 TINGKAT 3 NO 17 PANDAN PERDANA AMPANG		3.11716	101.742	3.117157, 101.742133	Alive	Malay	Citizen	Male	MALAYSIA	Single/Sporadic	Lab confirmed Positive	Passive	SEROLOGY	5
939	2016_65	2016	11	30 JALAN CEMPAKA 5, TAMAN CEMPAKA, SERENDAH,		3.36912	101.612	3.3691202, 101.6122792	Alive	Malay	Citizen	Female	MALAYSIA	Single/Sporadic	Lab confirmed Positive	Passive	SEROLOGY	5
899	2016_25	2016	22	BLOK D-04-07, JALAN PUTRA PERDANA 3A,APPT. SIANTAN, PUTRA PERDANA, PUCHONG,SELANGOR.		2.94732	101.622	2.94732, 101.62206	Alive	Foreigners	Non-citizen	Male	INDONESIA	Single/Sporadic	Lab confirmed Positive	Passive	SEROLOGY	5
906	2016_32	2016	34	A-1-003 PUTERI PALMA CONDO IOI RESORT CITY		2.9667	101.711	2.9667019, 101.7108648	Alive	Malay	Citizen	Female	MALAYSIA	Single/Sporadic	Lab confirmed Positive	Passive	SEROLOGY	5
877	2016_3	2016	35	BLOK D 204 BLOK DELIMA,PUTRI LAKSAMANA JALAN BATU CAVES, TAMAN BATU CAVES, 68100 BATU CAVES, SELANGOR, MALAYSIA		3.23568	101.678	3.2356849, 101.6784908	Alive	Malay	Citizen	Male	MALAYSIA	Single/Sporadic	Lab confirmed Positive	Passive	SEROLOGY	5
881	2016_7	2016	31	BLOK DAHLIA, UNIT 5/8, TAMAN TUN TEJA, RAWANG SELANGOR.		3.25313	101.651	3.2531349, 101.6508636	Alive	Malay	Citizen	Male	MALAYSIA	Single/Sporadic	Lab confirmed Positive	Passive	Rapid Test	5
924	2016_50	2016	48	NO 2 JALAN 4 TAMAN MURNI BATU 9 CHERAS 016-306 0642		3.05969	101.769	3.0596924, 101.7691736	Alive	Chinese	Citizen	Female	MALAYSIA	Single/Sporadic	Lab confirmed Positive	Passive	SEROLOGY	5
884	2016_10	2016	49	NO 23 LORONG SUNGAI SERAI KUANG		3.09168	101.794	3.091682, 101.7940079	Deceased	Malay	Citizen	Female	MALAYSIA	Single/Sporadic	Lab confirmed Positive	Passive	SEROLOGY	5
932	2016_58	2016	23	30-17-06, BUKIT PANDAN 1, KONDOMINIUM 2,PANDAN PERDANA, KUALA LUMPUR		3.11506	101.738	3.1150589, 101.7380136	Alive	Malay	Citizen	Male	MALAYSIA	Single/Sporadic	Lab confirmed Positive	Passive	Rapid Test	6
892	2016_18	2016	32	2-G-7 FLAT SRI SEMENTA,TAMAN SRI SEMENTA,KAPAR		3.08962	101.375	3.089616, 101.3748772	Alive	Pribumi Sarawak	Citizen	Male	MALAYSIA	Single/Sporadic	Lab confirmed Positive	Passive	ELISA	6
917	2016_43	2016	10	NO.11 JLN SERI PUTRA 2/3D BANDAR SERI PUTRA 43000 KAJANG KUALA LUMPUR		2.88394	101.787	2.8839445, 101.7871652	Alive	Malay	Citizen	Male	MALAYSIA	Single/Sporadic	Lab confirmed Positive	Passive	Rapid Test	7
908	2016_34	2016	29	3-3-4-61 D'TINGGIAN SUASANA APARTMENT JALAN SUASANA 3/4 BANDAR TUN HUSSEIN ONN CHERAS		3.0544	101.766	3.0544036, 101.7661362	Alive	Malay	Citizen	Female	MALAYSIA	Single/Sporadic	Lab confirmed Positive	Passive	SEROLOGY	7
911	2016_37	2016	26	BATU 19 KG KUALA PERDEK 43100 HULU LANGAT		3.1752	101.854	3.175196, 101.8537409	Alive	Malay	Citizen	Male	MALAYSIA	Single/Sporadic	Lab confirmed Positive	Passive	SEROLOGY	8
886	2016_12	2016	32	F-4-02 SRI PUTERI APT JALAN UKAY PERDANA 2/1 AMPANG		3.21178	101.779	3.2117825, 101.7785182	Alive	Malay	Citizen	Male	MALAYSIA	Single/Sporadic	Lab confirmed Positive	Passive	SEROLOGY	8
878	2016_4	2016	51	LOT 8329-C JALAN BUNGA RAYA SATU, KAMPUNG BARU, BATU CAVES		3.2386	101.677	3.2385992, 101.67712	Alive	Malay	Citizen	Female	MALAYSIA	Single/Sporadic	Lab confirmed Positive	Passive	PCR	8
876	2016_2	2016	30	4-304 APT KENANGA, BDR BARU KENANGA, BATU CAVES, 68100, SELANGOR		3.23652	101.682	3.236516, 101.6816512	Deceased	Malay	Citizen	Male	MALAYSIA	Single/Sporadic	Lab confirmed Positive	Passive	SEROLOGY	8
898	2016_24	2016	30	CAFE MALAKAT UNITEN, BANDAR BARU BANGI UNITEN JALAN SERDANG, SEKSYEN 11, SELANGOR, 43650 BANDAR BARU BANGI		2.97749	101.731	2.9774901, 101.7307035	Alive	Malay	Citizen	Male	MALAYSIA	Single/Sporadic	Lab confirmed Positive	Passive	SEROLOGY	8
914	2016_40	2016	21	30-1 JALAN 8 TAMAN KAJANG PERDANA KAJANG		2.99579	101.804	2.9957851, 101.8040616	Alive	Malay	Citizen	Female	MALAYSIA	Single/Sporadic	Lab confirmed Positive	Passive	SEROLOGY	9
904	2016_30	2016	17	NO 12 KG TENGAH DESA PUTRA KAJANG		2.92199	101.72	2.9219943, 101.7197499	Alive	Malay	Citizen	Male	MALAYSIA	Single/Sporadic	Lab confirmed Positive	Passive	SEROLOGY	9
883	2016_9	2016	24	NO.70, JALAN DM 3/2A, TAMAN DESA MAS BANDAR COUNTRY HOMES, RAWANG		3.33655	101.526	3.3365547, 101.5264126	Alive	Malay	Citizen	Male	MALAYSIA	Single/Sporadic	Lab confirmed Positive	Passive	SEROLOGY	9
879	2016_5	2016	36	TIADA A ONE PRO CONTRUCTION KN52 LOT 8483 D KG NAKHODA BT CAVES, SELANGOR 68100		3.23314	101.706	3.2331401, 101.7060121	Alive	Foreigners	Non-citizen	Male	BANGLADESH	Single/Sporadic	Lab confirmed Positive	Passive	SEROLOGY	9
880	2016_6	2016	13	NO B02-01-03 PNGSAPURI PALMA JLN DESA RIA, BDR COUNTRY HOMES RAWANG, SELANGOR 48000		3.32627	101.536	3.3262705, 101.536189	Alive	Indian	Citizen	Male	MALAYSIA	Single/Sporadic	Lab confirmed Positive	Passive	SEROLOGY	9
912	2016_38	2016	24	NO 1 JLN MEDAN BANGI ,OFF JLN PERSIARAN KEMAJUAN,SEKSYEN 6,43650 BANDAR BARU BANGI		2.95286	101.757	2.9528558, 101.7573146	Alive	Malay	Citizen	Male	MALAYSIA	Single/Sporadic	Lab confirmed Positive	Passive	SEROLOGY	10
889	2016_15	2016	21	NO 19,JALAN 15,PANDAMARAN JAYA,PORT KLANG		3.00248	101.424	3.0024821, 101.4237882	Alive	Malay	Citizen	Male	MALAYSIA	Single/Sporadic	Lab confirmed Positive	Passive	ELISA	10
933	2016_59	2016	39	KG ORANG ASLI, SG CEMONG, SG LALANG, SEMENYIH		2.97952	101.865	2.9795169, 101.8645974	Alive	Malay	Citizen	Female	MALAYSIA	Single/Sporadic	Lab confirmed Positive	Passive	SEROLOGY	10
890	2016_16	2016	38	NO 91,JALAN ABDUL SAMAD,BANDAR SULTAN SULAIMAN,PORT KLANG		3.03099	101.382	3.0309948, 101.3821337	Alive	Malay	Citizen	Male	MALAYSIA	Single/Sporadic	Lab confirmed Positive	Passive	ELISA	10
909	2016_35	2016	26	JALAN BUNGA MATAHARI 2, TAMAN MAJU JAYA FASA 3, PANDAN INDAH, SELANGOR		3.12393	101.749	3.1239347, 101.7486338	Alive	Malay	Citizen	Male	MALAYSIA	Single/Sporadic	Lab confirmed Positive	Passive	SEROLOGY	10
934	2016_60	2016	19	NO 9 JALAN 14 TAMAN SRI TANJUNG 43500 SEMENYIH		2.94949	101.842	2.9494878, 101.8419087	Alive	Malay	Citizen	Male	MALAYSIA	Single/Sporadic	Lab confirmed Positive	Passive	SEROLOGY	11
915	2016_41	2016	40	NO.2, JLN. KOTA TAMAN KOTA, KAJANG, SELANGOR.		3.07148	101.766	3.0714847, 101.7661737	Alive	Foreigners	Non-citizen	Female	BANGLADESH	Single/Sporadic	Lab confirmed Positive	Passive	SEROLOGY	11
927	2016_53	2016	29	NO 6 LORONG 1 DESA PAHLAWAN BATU 10 JALAN AMPANG		3.16648	101.748	3.16648, 101.7483451	Alive	Malay	Citizen	Male	MALAYSIA	Single/Sporadic	Lab confirmed Positive	Passive	SEROLOGY	11
916	2016_42	2016	19	NO 54 JALAN PUNCAK 1/1 TAMAN PUNCAK UTAMA KAJANG		2.99497	101.744	2.9949692, 101.7435009	Alive	Chinese	Citizen	Male	MALAYSIA	Single/Sporadic	Lab confirmed Positive	Passive	SEROLOGY	11
888	2016_14	2016	72	NO 350 SG BERANG PULAU KETAM SELANGOR		3.03341	101.247	3.0334114, 101.2467116	Alive	Chinese	Citizen	Female	MALAYSIA	Single/Sporadic	Lab confirmed Positive	Passive	ELISA	12
905	2016_31	2016	51	RUMAH KONGSI, BUKIT DAMAR DENGKIL		2.8882	101.644	2.8882005, 101.643905	Alive	Foreigners	Non-citizen	Male	INDONESIA	Single/Sporadic	Lab confirmed Positive	Passive	SEROLOGY	12
895	2016_21	2016	43	TANJUNG MEDAN, BELIA 1 SUNGAI PANJNG		3.72838	101.134	3.7283809, 101.1342571	Alive	Others	Citizen	Male	MALAYSIA	Single/Sporadic	Lab confirmed Positive	Passive	Rapid Test	12
935	2016_61	2016	30	KG ORANG ASLI SUNGAI CEMONG JALAN SUNGAI LALANG,SEMENYIH 017-3788342-ISTERI		3.00737	101.869	3.0073744, 101.8690653	Deceased	Aborigins	Citizen	Male	MALAYSIA	Single/Sporadic	Lab confirmed Positive	Passive	SEROLOGY	12
950	2017_10	2017	11	1-3-05 PANGSAPURI BERINGIN TAMAN TUN PERAK, BATU 17 RAWANG		3.30228	101.583	3.302282, 101.582953	Alive	Malay	Citizen	Female	MALAYSIA	Single/Sporadic	Lab confirmed Positive	Passive	SEROLOGY	12
975	2017_35	2017	22	NO.403B,PARCEL 3,HOSTEL KUIS BANDAR SERI PUTRA 43000 KAJANG 0142977296 KWN		2.89076	101.79	2.8907553, 101.789594	Alive	Malay	Citizen	Male	MALAYSIA	Single/Sporadic	Lab confirmed Positive	Passive	SEROLOGY	1
969	2017_29	2017	24	NO 23 JALAN BALAKONG JAYA 2 ,TMN IMPIAN EHSAN,BALAKONG,43300 SERI KEMBANGAN		3.01345	101.752	3.0134515, 101.7516901	Alive	Malay	Citizen	Male	MALAYSIA	Single/Sporadic	Lab confirmed Positive	Passive	SEROLOGY	1
963	2017_23	2017	34	99B JLN ANGGERIK SG BESAR SABAK BERNAM		3.67754	100.986	3.6775408, 100.9860711	Alive	Malay	Citizen	Male	MALAYSIA	Single/Sporadic	Lab confirmed Positive	Passive	SEROLOGY	1
981	2017_41	2017	22	NO 4 JALAN 18 TAMAN PUTRA AMPANG		3.12037	101.765	3.1203727, 101.7651024	Alive	Indian	Citizen	Female	MALAYSIA	Single/Sporadic	Lab confirmed Positive	Passive	SEROLOGY	1
961	2017_21	2017	21	3317 KOLEJ SEROJA UITM SHAH ALAM, 40450 SHAH ALAM, SELANGOR		3.06838	101.506	3.0683797, 101.5058879	Alive	Malay	Citizen	Female	MALAYSIA	Single/Sporadic	Lab confirmed Positive	Passive	Rapid Test	1
943	2017_3	2017	55	NO. 9 JLN 9/16 TAMAN SRI GOMBAK, BATU CAVES SELANGOR		3.23132	101.703	3.2313187, 101.7031996	Alive	Chinese	Citizen	Female	MALAYSIA	Single/Sporadic	Lab confirmed Positive	Passive	PCR	2
976	2017_36	2017	48	NO.31,JALAN 3/24,SEKSYEN 3I,BANDAR BARU BANGI 43000 KAJANG		2.94218	101.782	2.9421813, 101.7818102	Alive	Malay	Citizen	Male	MALAYSIA	Single/Sporadic	Lab confirmed Positive	Passive	SEROLOGY	2
960	2017_20	2017	29	NO 7LORONG SENTOSA, TAMAN DAMAI TAMAN DAMAI 45500 TANJONG KARANG		3.41763	101.185	3.4176298, 101.1851699	Alive	Malay	Citizen	Female	MALAYSIA	Single/Sporadic	Lab confirmed Positive	Passive	SEROLOGY	3
945	2017_5	2017	50	LOT 13A KAMPUNG SERI INDAH SUNGAI BULOH		3.22597	101.571	3.225966, 101.570647	Alive	Malay	Citizen	Male	MALAYSIA	Single/Sporadic	Lab confirmed Positive	Passive	SEROLOGY	3
974	2017_34	2017	9	NO 13 JALAN SRI KENARI,TAMAN SERI KENARI,SG RAMAL,4300 KAJANG		2.99283	101.768	2.9928264, 101.7683075	Alive	Malay	Citizen	Female	MALAYSIA	Cluster/Outbreak	Lab confirmed Positive	Passive	SEROLOGY	3
942	2017_2	2017	55	NO 8 B JLN 26 SELAYANG BARU BT CAVES, SELANGOR 6810		3.2493	101.665	3.2492963, 101.6646501	Alive	Malay	Citizen	Female	MALAYSIA	Single/Sporadic	Lab confirmed Positive	Passive	SEROLOGY	3
953	2017_13	2017	23	MAHALLAH BILAL UIAM GOMBAK 53100 KUALA LUMPUR		3.24666	101.74	3.2466607, 101.7404171	Alive	Malay	Citizen	Male	MALAYSIA	Single/Sporadic	Lab confirmed Positive	Passive	SEROLOGY	4
971	2017_31	2017	10	NO 14 JALAN 89,TAMAN SAKAP KAJANG,PERDANA ,43000 KAJANG		2.99322	101.817	2.993218, 101.8170209	Alive	Indian	Citizen	Female	MALAYSIA	Single/Sporadic	Lab confirmed Positive	Passive	PCR	4
949	2017_9	2017	17	NO 170 JLN NAKHODA DLM KG NAKHODA BT CAVES, SELANGOR 68100		3.2515	101.682	3.2515035, 101.6823614	Alive	Malay	Citizen	Male	MALAYSIA	Single/Sporadic	Lab confirmed Positive	Passive	SEROLOGY	4
956	2017_16	2017	19	BLOK H-2-9 PANGSAPURI FLAT REBANA,BANDAR BUKIT RAJA		3.08745	101.433	3.0874456, 101.4333364	Alive	Malay	Citizen	Male	MALAYSIA	Single/Sporadic	Lab confirmed Positive	Passive	ELISA	5
980	2017_40	2017	46	42, TGKAT 3, FLAT TAMAN MUDA AMPANG		3.11753	101.754	3.11753, 101.7538984	Alive	Foreigners	Non-citizen	Male	MYANMAR	Single/Sporadic	Lab confirmed Positive	Passive	SEROLOGY	5
947	2017_7	2017	38	NO:22 JALAN MATANG JAYA 4 TAMAN MATANG JAYA, SG BULOH		3.24499	101.567	3.2449853, 101.5668823	Alive	Malay	Citizen	Female	MALAYSIA	Single/Sporadic	Lab confirmed Positive	Passive	Rapid Test	5
952	2017_12	2017	15	BATU 7 3/4 KAMPUNG SUNGAI CHIN -CHIN GOMBAK		3.24107	101.713	3.2410703, 101.7125451	Alive	Malay	Citizen	Male	MALAYSIA	Single/Sporadic	Lab confirmed Positive	Passive	SEROLOGY	5
955	2017_15	2017	52	4-3-07, RESIDENSI BISTARIA, JALAN UKAY BISTARI, AMPANG		3.19652	101.767	3.1965173, 101.766545	Alive	Malay	Citizen	Male	MALAYSIA	Single/Sporadic	Lab confirmed Positive	Passive	SEROLOGY	5
962	2017_22	2017	13	PT 7104, JALAN MAKMUR 3/1 TAMAN MAKMUR, SG BESAR		3.67733	100.976	3.6773303, 100.9761443	Alive	Chinese	Citizen	Male	MALAYSIA	Single/Sporadic	Lab confirmed Positive	Passive	SEROLOGY	5
959	2017_19	2017	45	LOT 2819, JALAN BELIMBING, MERU, 41050 KLANG		3.15318	101.42	3.1531793, 101.4197067	Deceased	Malay	Citizen	Male	MALAYSIA	Single/Sporadic	Lab confirmed Positive	Passive	SEROLOGY	5
970	2017_30	2017	5	NO.8-8, APARTMENT ANGGERIK RESIDENSI, TAMAN ANGGERIK RESIDENSI, KAJANG		2.97586	101.826	2.9758618, 101.8257932	Alive	Malay	Citizen	Male	MALAYSIA	Single/Sporadic	Lab confirmed Positive	Passive	SEROLOGY	5
965	2017_25	2017	4	1-A71 ALPHA ARENA APARTMENT LINGKARAN PUTRA PERDANA TAMAN PUTRA PERDANA 47100 PUCHONG SELANGOR		2.94586	101.614	2.9458595, 101.6137744	Alive	Malay	Citizen	Female	MALAYSIA	Single/Sporadic	Lab confirmed Positive	Passive	SEROLOGY	6
958	2017_18	2017	23	LOT 3207 LORONG HAJI TAHIR, JLN KEBUN, KLANG		2.96112	101.526	2.9611204, 101.5263417	Alive	Malay	Citizen	Male	MALAYSIA	Single/Sporadic	Lab confirmed Positive	Passive	ELISA	6
973	2017_33	2017	60	NO. 12, JALAN IMPIAN INDAH 1 SAUJANA IMPIAN		3.01339	101.792	3.0133867, 101.7924746	Alive	Malay	Citizen	Male	MALAYSIA	Single/Sporadic	Lab confirmed Positive	Passive	SEROLOGY	6
977	2017_37	2017	14	NO 47 JALAN BM 9/2C SEKSYEN 9 BUKIT MAHKOTA KAJANG		2.8774	101.807	2.877404, 101.8068548	Alive	Malay	Citizen	Male	MALAYSIA	Single/Sporadic	Lab confirmed Positive	Passive	SEROLOGY	6
944	2017_4	2017	63	NO 126 JLN SG 9/1 TAMAN SRI GOMBAK 68100 KUALA LUMPUR		3.25134	101.707	3.2513444, 101.7065687	Alive	Malay	Citizen	Male	MALAYSIA	Single/Sporadic	Lab confirmed Positive	Passive	PCR	6
968	2017_28	2017	35	NO 77, TAMAN BAHAGIA SG PELEK, SEPANG SELANGOR		2.64249	101.721	2.6424914, 101.7208127	Alive	Indian	Citizen	Male	MALAYSIA	Single/Sporadic	Lab confirmed Positive	Passive	Rapid Test	6
982	2017_42	2017	3	NO.15 JALAN TPS 3/13 TAMAN PELANGI SEMENYIH		2.93942	101.863	2.939418, 101.8627577	Alive	Indian	Citizen	Female	MALAYSIA	Single/Sporadic	Lab confirmed Positive	Passive	PCR	7
966	2017_26	2017	19	NO 5, JLN TASIK DEDAP 5, PANTAI SEPANG PUTRA, BAGAN LALANG		2.62602	101.694	2.626016, 101.6942853	Alive	Malay	Citizen	Male	MALAYSIA	Single/Sporadic	Lab confirmed Positive	Passive	SEROLOGY	7
978	2017_38	2017	19	NO 14 JALAN INDAH 3/7 TAMAN INDAH BT 11 CHERAS		3.04355	101.77	3.0435522, 101.7701611	Alive	Chinese	Citizen	Male	MALAYSIA	Single/Sporadic	Lab confirmed Positive	Passive	SEROLOGY	7
957	2017_17	2017	15	NO 52-2B JLN RAYA BARAT KS1 PERNIAGAAN JALAN RAYA BARAT		3.03694	101.443	3.0369387, 101.4428486	Alive	Malay	Citizen	Male	MALAYSIA	Single/Sporadic	Lab confirmed Positive	Passive	ELISA	7
951	2017_11	2017	8	11 A JALAN SP1 TAMAN SRI PUTRA 43000 SUNGAI BULOH		3.2406	101.649	3.2406002, 101.6493823	Alive	Foreigners	Non-citizen	Male	INDIA	Single/Sporadic	Lab confirmed Positive	Passive	SEROLOGY	7
979	2017_39	2017	63	22 JALAN RASMI 6 TAMAN RASMI JAYA AMPANG		3.15339	101.769	3.153393, 101.7686834	Alive	Malay	Citizen	Male	MALAYSIA	Single/Sporadic	Lab confirmed Positive	Passive	SEROLOGY	7
964	2017_24	2017	22	NO 58 RUMAH MURAH PERINGKAT 3 SEKINCHAN		3.50415	101.103	3.5041472, 101.1032892	Alive	Indian	Citizen	Male	MALAYSIA	Single/Sporadic	Lab confirmed Positive	Passive	MAT	7
948	2017_8	2017	31	11-5, PANGSAPURI RIA, JALAN AMANIAH MULIA 5, TAMAN AMANIAH MULIA, BATU CAVES		3.23595	101.676	3.2359501, 101.6760908	Alive	Malay	Citizen	Male	MALAYSIA	Single/Sporadic	Lab confirmed Positive	Passive	SEROLOGY	9
972	2017_32	2017	13	NO 1 JALAN BANGI AVENUE 1/3 BANGI AVENUE 1 KAJANG		2.89707	101.794	2.897069, 101.7936859	Alive	Malay	Citizen	Male	MALAYSIA	Single/Sporadic	Lab confirmed Positive	Passive	SEROLOGY	9
946	2017_6	2017	34	NO. 21A JALAN ST-1 OFF SG8/11, SERI GOMBAK TOWN VILLA, TAMAN SERI GOMBAK		3.25135	101.7	3.2513524, 101.6995653	Alive	Malay	Citizen	Male	MALAYSIA	Single/Sporadic	Lab confirmed Positive	Passive	Rapid Test	10
954	2017_14	2017	21	MAHALLAH SAFIYYAH UNIVERSITY ISLAM ANTARABANGSA, GOMBAK		3.25032	101.735	3.2503177, 101.73453	Alive	Malay	Citizen	Female	MALAYSIA	Single/Sporadic	Lab confirmed Positive	Passive	SEROLOGY	10
967	2017_27	2017	18	BLOK D1-A-06, ASRAMA XIAMEN UNIVERSITY, SEPANG		2.83243	101.707	2.8324251, 101.706975	Alive	Chinese	Citizen	Female	MALAYSIA	Single/Sporadic	Lab confirmed Positive	Passive	SEROLOGY	10
941	2017_1	2017	20	BAHAGIAN LATIHAN PERHUTANAN, JABATAN PERHUTANAN SEMENANJUNG MALAYSIA, 52100 KEPONG, KUALA LUMPUR		3.23584	101.63	3.2358353, 101.6296386	Alive	Malay	Citizen	Male	MALAYSIA	Single/Sporadic	Lab confirmed Positive	Passive	MAT	11
1012	2018_30	2018	40	LOT 2220 KAMPUNG BARU LABU LANJUT SEPANG		2.79215	101.714	2.792147, 101.713712	Alive	Malay	Citizen	Female	MALAYSIA	Single/Sporadic	Lab confirmed Positive	Passive	Rapid Test	1
999	2018_17	2018	28	C-3-24, PANGSAPURI SRI PUTERI, JALAN UKAY PERDANA 2/1, TAMAN UKAY PERDANA		3.21168	101.778	3.211683, 101.778183	Alive	Indian	Citizen	Male	MALAYSIA	Single/Sporadic	Lab confirmed Positive	Passive	SEROLOGY	1
1007	2018_25	2018	67	NO.683, JALAN SK 4/3, KAMPUNG BARU SERI KEMBANGAN, 43300 SERI KEMBANGAN		3.02689	101.702	3.026888, 101.7018788	Deceased	Chinese	Citizen	Male	MALAYSIA	Single/Sporadic	Lab confirmed Positive	Passive	PCR	1
1011	2018_29	2018	43	NO 30 LOT 4031 LORONG AMAN KG BARU JENDERAM HILIR 43800 DENGKIL		2.88234	101.728	2.8823354, 101.7279286	Alive	Malay	Citizen	Male	MALAYSIA	Single/Sporadic	Lab confirmed Positive	Passive	SEROLOGY	1
1034	2018_52	2018	49	NO 19 JALAN MERANTI 8A/6 BNADAR UTAMA BATANGKALI		3.45273	101.654	3.4527274, 101.6537952	Alive	Malay	Citizen	Male	MALAYSIA	Single/Sporadic	Lab confirmed Positive	Passive	Rapid Test	1
1026	2018_44	2018	26	NO.27,JALAN CP 6/52 TAMAN CHERAS PERDANA 43200 CHERAS 019-8023488		3.04035	101.763	3.0403457, 101.7632491	Alive	Malay	Citizen	Male	MALAYSIA	Single/Sporadic	Lab confirmed Positive	Passive	SEROLOGY	1
1029	2018_47	2018	27	BLOK E-2-04 PANDAN TERRACE APARTMENT JALAN TAMAN PERDANA, PANDAN PERDANA, 55300		3.12203	101.742	3.1220278, 101.7416204	Alive	Pribumi Sabah	Citizen	Male	MALAYSIA	Single/Sporadic	Lab confirmed Positive	Passive	SEROLOGY	2
1020	2018_38	2018	33	NO 28 JALAN INTAN 5/1 TAMAN SRI NANDING ,HULU LANGAT		3.1045	101.809	3.1044964, 101.8091775	Alive	Indian	Citizen	Male	MALAYSIA	Single/Sporadic	Lab confirmed Positive	Passive	SEROLOGY	2
998	2018_16	2018	6	LOT 392-B1, JLN TENGAH 7, Kampung Tengah Lembah Gombak, 53100, Selangor		3.22999	101.711	3.2299925, 101.7107859	Alive	Malay	Citizen	Male	MALAYSIA	Single/Sporadic	Lab confirmed Positive	Passive	Rapid Test	2
1015	2018_33	2018	27	NO.10,LOT 5642 BATU 1,JALAN AIR HITAM 43800 DENGKIL 0166950500SUAMI		2.88622	101.663	2.88622, 101.6626721	Alive	Indian	Citizen	Female	MALAYSIA	Single/Sporadic	Lab confirmed Positive	Passive	PCR	2
1022	2018_40	2018	48	BATU 21 KG SG GABAI, HULU LANGAT		3.16609	101.909	3.1660921, 101.9090289	Alive	Foreigners	Non-citizen	Male	INDONESIA	Single/Sporadic	Lab confirmed Positive	Passive	SEROLOGY	2
1025	2018_43	2018	40	NO 4 LORONG CP 3/26, TAMAN CHERAS PERDANA, 43200 BATU 9 CHERAS		3.04226	101.767	3.042265, 101.7674393	Alive	Malay	Citizen	Female	MALAYSIA	Single/Sporadic	Lab confirmed Positive	Passive	SEROLOGY	3
1004	2018_22	2018	27	FLAT SRI MANJA, JALAN SRI MANJA, TAMAN SRI MANJA, 46000 PETALING JAYA, SELANGOR (ALAMAT LENGKAP TIDAK INGAT)		3.0738	101.643	3.0738039, 101.6427556	Alive	Foreigners	Non-citizen	Male	INDONESIA	Single/Sporadic	Lab confirmed Positive	Passive	SEROLOGY	3
1008	2018_26	2018	21	NO. 52, JALAN GASING, BUKIT GASING, PETALING JAYA		3.0984	101.653	3.0984043, 101.6526464	Alive	Indian	Citizen	Female	MALAYSIA	Single/Sporadic	Lab confirmed Positive	Passive	SEROLOGY	3
1003	2018_21	2018	31	NO. 11, JALAN AMPANG TENAR 28/27, TAMAN ALAM MEGAH, SHAH ALAM		3.0075	101.561	3.0075001, 101.5611076	Alive	Foreigners	Non-citizen	Male	MYANMAR	Single/Sporadic	Lab confirmed Positive	Passive	SEROLOGY	3
1010	2018_28	2018	35	LOT H1526, FLAT LEMBAH SUBANG, TAMAN PUTRA DAMAI, PETALING JAYA		3.11209	101.591	3.1120902, 101.5912397	Alive	Malay	Citizen	Female	MALAYSIA	Single/Sporadic	Lab confirmed Positive	Passive	SEROLOGY	3
989	2018_7	2018	49	NO 442 JLN 16 KEPONG ULU		3.22669	101.635	3.2266911, 101.6349712	Alive	Chinese	Citizen	Male	MALAYSIA	Single/Sporadic	Lab confirmed Positive	Passive	SEROLOGY	3
1031	2018_49	2018	18	10-15 PERMAI SRI KG MELAYU AMPANG, AMPANG		3.15683	101.757	3.1568347, 101.7570047	Alive	Foreigners	Non-citizen	Male	INDIA	Single/Sporadic	Lab confirmed Positive	Passive	SEROLOGY	3
1024	2018_42	2018	39	LOT 5209 SEALAND TEKNIKAL SDN BHD JALAN BALAKONG JAYA TAMAN BALAKONG JAYA 03-79847299 OFFICE 012-9891943 SUPERVISOR SITE 012-9893461 SUPERVISOR STOR		3.00735	101.739	3.0073544, 101.7390124	Alive	Foreigners	Non-citizen	Male	PAKISTAN	Single/Sporadic	Lab confirmed Positive	Passive	SEROLOGY	4
1021	2018_39	2018	16	NO 5 TAMAN SERI MASJID BATU 20 SG LUI HULU LANGAT		3.16459	101.881	3.1645905, 101.8814269	Alive	Malay	Citizen	Male	MALAYSIA	Single/Sporadic	Lab confirmed Positive	Passive	SEROLOGY	4
1005	2018_23	2018	10	NO. 14, JALAN SS 4C/9, KELANA JAYA, PETALING JAYA		3.11022	101.602	3.1102172, 101.6024595	Alive	Chinese	Citizen	Male	MALAYSIA	Single/Sporadic	Lab confirmed Positive	Passive	SEROLOGY	4
1017	2018_35	2018	27	LOT 714 JALAN PERMAI J KG TASIK PERMAI AMPANG HULU LANGAT		3.12776	101.781	3.1277631, 101.7813799	Alive	Foreigners	Non-citizen	Male	PAKISTAN	Single/Sporadic	Lab confirmed Positive	Passive	SEROLOGY	4
1032	2018_50	2018	19	NO 12 JALAN AROWANA 8 TAMAN DESA ULU YAM BHARU		3.43783	101.659	3.4378273, 101.6588444	Alive	Malay	Citizen	Male	MALAYSIA	Single/Sporadic	Lab confirmed Positive	Passive	Rapid Test	4
988	2018_6	2018	16	E06-18 SIMFONY HEIGHTS JLN MEDAN BT CAVES BT CAVES, SELANGOR 68100		3.23341	101.674	3.2334084, 101.6742456	Alive	Malay	Citizen	Male	MALAYSIA	Single/Sporadic	Lab confirmed Positive	Passive	SEROLOGY	4
983	2018_1	2018	21	NO 14 JALAN 16 SELAYANG BARU BATU CAVES, SELANGOR 68100		3.24524	101.672	3.2452354, 101.6721752	Alive	Indian	Citizen	Female	MALAYSIA	Single/Sporadic	Lab confirmed Positive	Passive	SEROLOGY	4
991	2018_9	2018	14	KAMPUNG ORANG ASLI SUNGAI BULOH,		3.22992	101.588	3.2299191, 101.5882339	Alive	Indian	Citizen	Male	MALAYSIA	Single/Sporadic	Lab confirmed Positive	Passive	SEROLOGY	5
1033	2018_51	2018	38	NO 1 JLN BESARA KG KALONG TENGAH ULU YAM BHARU BATANG KALI SELANGOR		3.43797	101.658	3.437965, 101.657637	Alive	Malay	Citizen	Male	MALAYSIA	Single/Sporadic	Lab confirmed Positive	Passive	SEROLOGY	5
993	2018_11	2018	39	19-1 JLN DM 2 TAMAN DESA MUTIARA BDR COUNTRY HOMES RAWANG SELANGOR		3.32735	101.523	3.3273481, 101.5227219	Alive	Malay	Citizen	Male	MALAYSIA	Single/Sporadic	Lab confirmed Positive	Passive	SEROLOGY	5
1016	2018_34	2018	31	NO 22, JALAN SL 13/5 BANDAR SUNGAI LONG 43200 KAJANG		3.04036	101.786	3.0403626, 101.7856184	Alive	Malay	Citizen	Male	MALAYSIA	Single/Sporadic	Lab confirmed Positive	Passive	SEROLOGY	6
987	2018_5	2018	49	NO. 944 JALAN E4/5 TAMAN EHSAN, KEPONG KL		3.22057	101.625	3.220572, 101.625291	Alive	Malay	Citizen	Male	MALAYSIA	Single/Sporadic	Lab confirmed Positive	Passive	SEROLOGY	7
1030	2018_48	2018	50	12R -12B NO 4- JALAN PERDANA 4/3 PANDAN PERDANA 018-2442390		3.12017	101.743	3.1201654, 101.7428424	Alive	Foreigners	Non-citizen	Female	INDONESIA	Single/Sporadic	Lab confirmed Positive	Passive	SEROLOGY	7
984	2018_2	2018	23	404,BLOK D 4 ENGGANG APARTMENT BUKIT IDAMAN BATI, SELANGOR 68100		3.2467	101.644	3.2467008, 101.6441228	Deceased	Malay	Citizen	Male	MALAYSIA	Single/Sporadic	Lab confirmed Positive	Passive	PCR	7
1006	2018_24	2018	52	A31-4-38, FLAT TAMAN PUCHONG PERMAI, JALAN PERMAI 1/14, TAMAN PUCHONG PERMAI, 47150 PUCHONG		3.0076	101.597	3.0076034, 101.5967806	Alive	Indian	Citizen	Female	MALAYSIA	Single/Sporadic	Lab confirmed Positive	Passive	PCR	7
986	2018_4	2018	38	(NO 27 JLN MUTIARA 5/5 TMN SELAYANG MUTIARA BATU CAVES)		3.25913	101.663	3.2591345, 101.6632791	Alive	Indian	Citizen	Male	MALAYSIA	Single/Sporadic	Lab confirmed Positive	Passive	SEROLOGY	7
1000	2018_18	2018	36	NO.6 JALAN TANJUNG BIDARA, 30/210, SEKSYEN 30, JALAN KEBUN SHAH ALAM, SELANGOR.		2.97826	101.512	2.9782631, 101.5118771	Deceased	Malay	Citizen	Male	MALAYSIA	Single/Sporadic	Lab confirmed Positive	Passive	SEROLOGY	8
1014	2018_32	2018	23	D-2-7-3 KOLEJ 17 UPM SERDANG 43400 SERDANG SELANGOR 01110161434 KAWAN		2.97833	101.716	2.9783333, 101.7155556	Alive	Malay	Citizen	Male	MALAYSIA	Single/Sporadic	Lab confirmed Positive	Passive	SEROLOGY	8
1028	2018_46	2018	42	7BF JALAN KOSAS 1/3 TAMAN KOSAS AMPANG		3.14703	101.771	3.1470306, 101.7710535	Alive	Foreigners	Non-citizen	Female	PHILIPINE	Single/Sporadic	Lab confirmed Positive	Passive	SEROLOGY	8
1009	2018_27	2018	27	211, BLOK 5, FLAT PKNS, JALAN CANGKUL 19/3, 40000 SHAH ALAM SELANGOR		3.04861	101.523	3.0486063, 101.5232758	Alive	Malay	Citizen	Male	MALAYSIA	Single/Sporadic	Lab confirmed Positive	Passive	PCR	9
985	2018_3	2018	42	NO.15BR, JALAN DAYA 6, TAMAN DAYA KEPONG		3.2231	101.638	3.2230954, 101.6379497	Alive	Foreigners	Non-citizen	Male	INDONESIA	Single/Sporadic	Lab confirmed Positive	Passive	SEROLOGY	9
1019	2018_37	2018	32	NO 24 JALAN MUTIARA 9 TAMAN SRI NANDING HULU LANGAT		3.10275	101.807	3.1027479, 101.8073948	Alive	Malay	Citizen	Female	MALAYSIA	Single/Sporadic	Lab confirmed Positive	Passive	SEROLOGY	9
990	2018_8	2018	18	BLOK K1-12/2 LEBUHRAYA PINGGIRAN BATU CAVES, SELANGOR 68100		3.25113	101.693	3.2511277, 101.6925306	Alive	Malay	Citizen	Male	MALAYSIA	Single/Sporadic	Lab confirmed Positive	Passive	SEROLOGY	9
1001	2018_19	2018	62	NO 11 JALAN CENDERAI TAMAN SINARAN BATANG BERJUNTAI		3.37592	101.393	3.375921, 101.3925791	Deceased	Indian	Citizen	Female	MALAYSIA	Single/Sporadic	Lab confirmed Positive	Passive	SEROLOGY	9
1018	2018_36	2018	12	LOT 481-B, KG SESAPAN BT MINANGKABAU 43700 BERANANG SELANGOR		2.89226	101.89	2.8922645, 101.8898088	Alive	Malay	Citizen	Male	MALAYSIA	Single/Sporadic	Lab confirmed Positive	Passive	SEROLOGY	9
1013	2018_31	2018	26	LOT 1873, KG BARU LANJUT, SALAK TINGGI 43900 SEPANG, SELANGOR		2.78994	101.719	2.7899396, 101.7191357	Alive	Malay	Citizen	Male	MALAYSIA	Single/Sporadic	Lab confirmed Positive	Passive	Rapid Test	9
995	2018_13	2018	41	NO 13D JALAN WATERPARK TAMAN HIJAU RAWANG 0173163806-SAUDARA		3.32048	101.576	3.320482, 101.5759238	Alive	Indian	Citizen	Female	MALAYSIA	Single/Sporadic	Lab confirmed Positive	Passive	Immunohistochemical staining	10
997	2018_15	2018	54	LOT 2652/18 JALAN KERDAS 5, SELANGOR		3.2253	101.714	3.2253036, 101.7137382	Alive	Malay	Citizen	Male	MALAYSIA	Single/Sporadic	Lab confirmed Positive	Passive	SEROLOGY	10
1055	2019_21	2019	40	BLOCK C, PACIFIC PLACE, PJU1A/4, KELANA JAYA		3.10396	101.597	3.103959, 101.5970884	Deceased	Foreigners	Non-citizen	Male	BANGLADESH	Single/Sporadic	Lab confirmed Positive	Active	MAT	10
1023	2018_41	2018	36	D-1-19 BLOK D JALAN 1/18 FLAT SEKSYEN 1 BANDAR TEKNOLOGI KAJANG SELANGOR		2.96767	101.827	2.96767, 101.8270058	Alive	Malay	Citizen	Female	MALAYSIA	Single/Sporadic	Lab confirmed Positive	Passive	Rapid Test	11
1027	2018_45	2018	63	NO 29 JALAN PUTRI JAYA 7 TAMAN PUTRI JAYA 43200 CHERAS SEL		3.06769	101.764	3.0676885, 101.763698	Alive	Indian	Citizen	Male	MALAYSIA	Single/Sporadic	Lab confirmed Positive	Passive	SEROLOGY	11
994	2018_12	2018	69	NO 49 JALAN 2 RUMAH PKNS BATU 16 RAWANG SELANGOR 48000		3.30383	101.593	3.3038317, 101.5933489	Alive	Chinese	Citizen	Male	MALAYSIA	Single/Sporadic	Lab confirmed Positive	Passive	ELISA	11
996	2018_14	2018	45	3422 - 15 NEW GREEN PARK RAWANG, SELANGOR		3.33166	101.572	3.331655, 101.5720589	Alive	Malay	Citizen	Male	MALAYSIA	Single/Sporadic	Lab confirmed Positive	Passive	SEROLOGY	12
1002	2018_20	2018	23	NO 34, JALAN SS21/39, DAMANSARA UTAMA, 47400 PJ, SELANGOR		3.13602	101.621	3.1360231, 101.6214376	Deceased	Foreigners	Non-citizen	Male	MYANMAR	Single/Sporadic	Lab confirmed Positive	Passive	MAT	12
992	2018_10	2018	13	B7-3-03 BIRCHWOOD COURT, JALAN HIJAU 9 BANDAR TASIK RAWANG		3.32048	101.576	3.320482, 101.5759238	Alive	Malay	Citizen	Male	MALAYSIA	Single/Sporadic	Lab confirmed Positive	Passive	SEROLOGY	12
1064	2019_30	2019	28	AK-01 PANGSAPURI SUASANA IDAMAN SUNGAI MERAB LUAR 43000 KAJANG 0148044617 ADIK. 0143665651-SAUDARA		2.93645	101.743	2.9364487, 101.7425739	Alive	Malay	Citizen	Male	MALAYSIA	Single/Sporadic	Lab confirmed Positive	Passive	PCR	1
1063	2019_29	2019	38	SUBUR SEJAHTERA SDB BHD NO 23 JLN AIRPORT 43900 SEPANG		2.69137	101.751	2.691369, 101.7505271	Alive	Foreigners	Non-citizen	Male	MYANMAR	Single/Sporadic	Lab confirmed Positive	Passive	SEROLOGY	1
1062	2019_28	2019	23	NO.20, TAMAN TANJUNG MAS BATU 2, SEPANG		2.69137	101.751	2.691369, 101.7505271	Alive	Malay	Citizen	Male	MALAYSIA	Single/Sporadic	Lab confirmed Positive	Passive	SEROLOGY	1
1056	2019_22	2019	39	NO. 374, JALAN CITIZEN, KAMPUNG BARU SUNGAI BULOH		3.19566	101.564	3.1956552, 101.5637296	Alive	Chinese	Citizen	Male	MALAYSIA	Single/Sporadic	Lab confirmed Positive	Passive	PCR	1
1072	2019_38	2019	14	NO 17, JALAN MELOR 8F, DESA MELOR, SERENDAH		3.36137	101.631	3.3613734, 101.630999	Alive	Malay	Citizen	Female	MALAYSIA	Single/Sporadic	Lab confirmed Positive	Passive	PCR	2
1049	2019_15	2019	43	NO 97 JLN SP 2/3 TMN SRI PRISTANA 47000 SG BULOH SEL		3.20644	101.471	3.2064404, 101.4711289	Alive	Malay	Citizen	Male	MALAYSIA	Single/Sporadic	Lab confirmed Positive	Passive	SEROLOGY	2
1051	2019_17	2019	31	I-3-5, PARK LAND COMMERCIAL HUB, JALAN SS7/26 KELANA JAYA (STAFF HOSTEL)		3.10621	101.593	3.1062138, 101.593328	Deceased	Foreigners	Non-citizen	Male	NEPAL	Single/Sporadic	Lab confirmed Positive	Passive	SEROLOGY	3
1041	2019_7	2019	59	11 JLN DESA 13/20 BDR COUNTRY HOME RAWANG		3.33233	101.527	3.3323327, 101.5274055	Alive	Chinese	Citizen	Male	MALAYSIA	Single/Sporadic	Lab confirmed Positive	Passive	SEROLOGY	3
1075	2019_41	2019	12	1014 JALAN HAJI IBRAHIM KAMPUNG SUNGAI CHOH RAWANG, SELANGOR 48200		3.34673	101.592	3.3467261, 101.5917115	Alive	Malay	Citizen	Female	MALAYSIA	Single/Sporadic	Lab confirmed Positive	Passive	SEROLOGY	3
1040	2019_6	2019	36	KG ORANG ASLI , KUALA GARING, 48000 RAWANG, SELANGOR ( BAWAH MEMORIAL PARK RAWANG UTAMA)		3.26552	101.572	3.2655236, 101.5717603	Alive	Malay	Citizen	Male	MALAYSIA	Single/Sporadic	Lab confirmed Positive	Passive	SEROLOGY	3
1073	2019_39	2019	83	NO 5A, TAMAN BUKIT BUNGA, KUALA KUBU BHARU		3.56494	101.667	3.5649388, 101.6667392	Alive	Chinese	Citizen	Male	MALAYSIA	Single/Sporadic	Lab confirmed Positive	Passive	Rapid Test	4
1071	2019_37	2019	49	NO 6, JALAN TERATAI 15A, SEKSYEN BB11 BANDAR BUKIT BERUNTUNG		3.40043	101.556	3.4004328, 101.5556985	Alive	Indian	Citizen	Female	MALAYSIA	Single/Sporadic	Lab confirmed Positive	Passive	SEROLOGY	4
1070	2019_36	2019	44	NO 3 LORONG LAMAN (C3) KAMPUNG PANDAN DALAM AMPANG		3.14392	101.746	3.1439187, 101.7460891	Deceased	Malay	Citizen	Male	MALAYSIA	Single/Sporadic	Lab confirmed Positive	Passive	SEROLOGY	4
1069	2019_35	2019	57	NO 4 JALAN BUNGA CEMPAKA 14 TAMAN KENCANA AMPANG		3.11844	101.752	3.1184421, 101.7521917	Alive	Malay	Citizen	Male	MALAYSIA	Single/Sporadic	Lab confirmed Positive	Passive	SEROLOGY	5
1074	2019_40	2019	35	NO.6 JLN TRU 2 TAMAN RASA UTAMA 44200,RASA SELANGOR		3.48932	101.631	3.4893213, 101.6314212	Alive	Malay	Citizen	Male	MALAYSIA	Single/Sporadic	Lab confirmed Positive	Passive	Rapid Test	5
1038	2019_4	2019	28	NO 27 GARING PERMAI TMN GARING UTAMA 48000 RAWANG SELANGOR		3.34357	101.558	3.3435723, 101.5581999	Alive	Foreigners	Non-citizen	Male	INDIA	Cluster/Outbreak	Lab confirmed Positive	Passive	SEROLOGY	5
1039	2019_5	2019	34	NO 27, GARING PERMAI, TAMAN GARING UTAMA, RAWANG		3.34357	101.558	3.3435723, 101.5581999	Alive	Foreigners	Non-citizen	Male	INDIA	Cluster/Outbreak	Lab confirmed Positive	Passive	SEROLOGY	5
1054	2019_20	2019	25	1405, BLOK B, PALM SPRING CONDOMINIUMS, JALAN PJU 3/29, SUNWAY DAMANSARA, 47810 PETALING JAYA, SELANGOR		3.15233	101.6	3.1523278, 101.5997979	Alive	Indian	Citizen	Male	MALAYSIA	Single/Sporadic	Lab confirmed Positive	Passive	SEROLOGY	6
1043	2019_9	2019	32	NO 38 JALAN 13 TAMAN PELANGI, RAWANG SELANGOR		3.29545	101.554	3.2954508, 101.5539362	Alive	Foreigners	Non-citizen	Female	MYANMAR	Single/Sporadic	Lab confirmed Positive	Passive	SEROLOGY	6
1046	2019_12	2019	15	NO 84 JALAN VELOX 12 TAMAN VELOX 48000. RAWANG		3.31693	101.525	3.3169286, 101.5252417	Alive	Malay	Citizen	Male	MALAYSIA	Single/Sporadic	Lab confirmed Positive	Passive	SEROLOGY	6
1048	2019_14	2019	18	NO 42 JALAN MEMPELAM TAMAN SRI JAROM SUNGAI JAROM 42600 JENJAROM		2.87536	101.491	2.8753565, 101.491213	Alive	Malay	Citizen	Male	MALAYSIA	Single/Sporadic	Lab confirmed Positive	Passive	SEROLOGY	7
1057	2019_23	2019	37	F-2-3, BLOK F, PUCHONG UTAMA COURT 1, TAMAN PUCHONG UTAMA, 47100 PUCHONG ( 01267828994 SUAMI)		2.99174	101.616	2.9917412, 101.6156008	Alive	Malay	Citizen	Female	MALAYSIA	Single/Sporadic	Lab confirmed Positive	Passive	SEROLOGY	7
1045	2019_11	2019	30	NO 13 M RESIDEN RAWANG		3.31819	101.509	3.318193, 101.509326	Alive	Malay	Citizen	Male	MALAYSIA	Single/Sporadic	Lab confirmed Positive	Passive	SEROLOGY	7
1058	2019_24	2019	49	NO. 130, JALAN BUNGA ROS, KAMPUNG PASIR, BATU 14, PUCHONG		3.00024	101.624	3.0002373, 101.6238324	Alive	Chinese	Citizen	Male	MALAYSIA	Single/Sporadic	Lab confirmed Positive	Passive	ELISA	7
1068	2019_34	2019	52	NO 3 JALAN BUNGA KERTAS TAMAN MUDUN BATU 9 CHERAS		3.08224	101.769	3.0822408, 101.768937	Alive	Malay	Citizen	Male	MALAYSIA	Single/Sporadic	Lab confirmed Positive	Passive	SEROLOGY	8
1036	2019_2	2019	10	B-02-07 JALAN SM 1/1 SELAYANG MULIA, BATU CAVES		3.27041	101.676	3.2704147, 101.6762657	Alive	Indian	Citizen	Male	MALAYSIA	Single/Sporadic	Lab confirmed Positive	Passive	SEROLOGY	8
1076	2019_42	2019	21	K-2-1 APT KENANGA TMN BUNGA RAYA BKT BERUNTUNG RAWANG		3.43905	101.545	3.439045, 101.545301	Alive	Malay	Citizen	Male	MALAYSIA	Single/Sporadic	Lab confirmed Positive	Passive	SEROLOGY	8
1042	2019_8	2019	13	NO.17, JALAN PUTERI HEIGHTS BANDAR COUNTRY HOMES RAWANG SELANGOR		3.33843	101.526	3.3384276, 101.5264669	Alive	Malay	Citizen	Male	MALAYSIA	Single/Sporadic	Lab confirmed Positive	Passive	PCR	8
1047	2019_13	2019	54	49, JALAN BU 1/1 TAMAN BUKIT UTAMA BUKIT ANTARABANGSAR AMPANG		3.18045	101.771	3.1804528, 101.7706057	Alive	Malay	Citizen	Male	MALAYSIA	Single/Sporadic	Lab confirmed Positive	Passive	SEROLOGY	8
1052	2019_18	2019	28	E-3-9, BLOCK E, SRI ARA APARTMENT, JALAN PJU 1A/5, TAMAN PERINDUSTRIAN JAYA, ARA DAMANSARA, 47301 PETALING JAYA		3.1189	101.571	3.1189036, 101.5712626	Deceased	Chinese	Citizen	Male	MALAYSIA	Single/Sporadic	Lab confirmed Positive	Passive	SEROLOGY	8
1066	2019_32	2019	44	B1316 APT IMPIAN WARISAN TAMAN IMPIAN WARISAN PEKAN BATU 18 HULU LANGAT		3.16463	101.847	3.16463, 101.8466963	Alive	Malay	Citizen	Male	MALAYSIA	Single/Sporadic	Lab confirmed Positive	Passive	SEROLOGY	9
1067	2019_33	2019	25	LOT 44B JALAN KELISA 4 KAMPUNG SUNGAI TANGKAS KAJANG (SEBELAH RUMAH KETUA KAMPUNG SUNGAI TANGKAS)		2.9439	101.788	2.9439026, 101.7883204	Alive	Malay	Citizen	Female	MALAYSIA	Single/Sporadic	Lab confirmed Positive	Passive	SEROLOGY	9
1053	2019_19	2019	88	NO. 2018, JALAN SK 13/11, KAMPUNG BARU SERI KEMBANGAN, 43300 SERI KEMBANGAN, SELANGOR		3.02711	101.697	3.0271147, 101.6972283	Deceased	Indian	Citizen	Female	MALAYSIA	Single/Sporadic	Lab confirmed Positive	Passive	SEROLOGY	9
1044	2019_10	2019	20	PARA MANUFACTURING NO 6&8 JALAN TIGA, TAMAN, KAWASAN INDUSTRI GREATYEAR CAPITAL 48000 RAWANG SLENAGOR		3.30466	101.578	3.3046644, 101.5775198	Alive	Foreigners	Non-citizen	Male	NEPAL	Single/Sporadic	Lab confirmed Positive	Passive	SEROLOGY	10
1037	2019_3	2019	16	LOT 2540-1 LORONG KENANGA KPG KENANGA BATU 17 3/4 RAWANG		3.32048	101.576	3.320482, 101.5759238	Alive	Malay	Citizen	Male	MALAYSIA	Single/Sporadic	Lab confirmed Positive	Passive	PCR	10
1059	2019_25	2019	39	LADANG SUNGAI BERNAM		3.76473	101.049	3.76473, 101.0489955	Alive	Foreigners	Non-citizen	Male	INDIA	Single/Sporadic	Lab confirmed Positive	Passive	Rapid Test	12
1060	2019_26	2019	67	NO 16, LORONG 1 KAMPUNG BARU NELAYAN, SUNGAI BESAR,SELANGOR		3.67124	100.977	3.67124, 100.9773715	Alive	Malay	Citizen	Male	MALAYSIA	Single/Sporadic	Lab confirmed Positive	Passive	SEROLOGY	12
1061	2019_27	2019	59	NO 5. JLN 1. BLOK C. RANCANGAN TANAH BELIA 2. SG BESAR 45300 SELANGOR		3.76518	100.989	3.7651793, 100.9886709	Alive	Malay	Citizen	Female	MALAYSIA	Single/Sporadic	Lab confirmed Positive	Passive	SEROLOGY	12
1050	2019_16	2019	34	A 15-06 PANGSAPURI KEMUNING SEKSYEN 8 PPR KOTA DAMANSARA		3.08985	101.508	3.089848, 101.5078201	Alive	Malay	Citizen	Male	MALAYSIA	Single/Sporadic	Lab confirmed Positive	Passive	SEROLOGY	12
1065	2019_31	2019	25	BLOK A3, FLAT TAMAN BUKIT SEGAR, CHERAS		3.09225	101.755	3.092248, 101.7545551	Alive	Pribumi Sarawak	Citizen	Female	MALAYSIA	Single/Sporadic	Lab confirmed Positive	Passive	Rapid Test	12
1035	2019_1	2019	21	BLOK B-3-6 P/PURI LAKSAMANA JALAN LAKSAMANA KAMPUNG LAKSAMANA		3.24635	101.676	3.2463486, 101.6757051	Alive	Malay	Citizen	Male	MALAYSIA	Single/Sporadic	Lab confirmed Positive	Passive	SEROLOGY	12
